# Supplementary material for: Is ChatGPT's Knowledge on Rhinology Accurate? Can It Be Utilized in Medical Education and Patient Information?
Source: Research Square preprint supplement (doi:10.21203/rs.3.rs-5788648/v1), 2025-01-20
Supplement: Supplementary file 1 [file 76bbdaed7bb5ebc3c2cadf3f.docx]

|  | |  | Evaluation of answers | | |
| --- | --- | --- | --- | --- | --- |
|  | 1 | Completely correct | |
|  | 2 | Partialy correct | |
|  | 3 | A mix of accurate and inaccurate/misleading | |
|  | 4 | Completely incorrect/ irrelevant | |
| QUESTIONS | ANSWERS 1 | ANSWERS 2 | CONTROLLER 1 | CONTROLLER 2 | CONTROLLER 3 |
| General rhinology |  |  |  |  |  |
| 1. What is the physiological importance of paranasal sinuses? | Paranasal sinuses are air-filled spaces located within the bones of the skull surrounding the nasal cavity. They include the frontal, ethmoid, sphenoid, and maxillary sinuses. While their exact function isn't fully understood, they serve several physiological purposes:   1. **Resonance**: Paranasal sinuses help to modify the quality of the voice by acting as resonating chambers. They enhance vocal resonance by providing additional volume and resonance to the sound produced by the larynx. 2. **Decreasing skull weight**: The sinuses help to reduce the weight of the skull, making it lighter. This weight reduction may aid in reducing the strain on the neck muscles and promoting better balance. 3. **Thermal insulation**: The air within the sinuses acts as an insulator, helping to maintain the temperature of the skull. This insulation is particularly important in cold environments to prevent excessive heat loss from the head. 4. **Humidification and filtration**: The sinuses help to humidify and filter the air we breathe before it enters the respiratory system. They trap particles and debris, preventing them from entering the lungs, and add moisture to the air, which is essential for maintaining the health of the respiratory tract. 5. **Protection**: Paranasal sinuses provide a layer of protection to the brain by acting as a cushion against trauma to the face and head. They also act as shock absorbers during activities such as jumping or running.   Overall, while the precise function of paranasal sinuses remains somewhat enigmatic, they play essential roles in voice resonance, skull weight reduction, thermal regulation, air humidification and filtration, and providing protection to the brain and facial structures. | Consistent | 1 | 1 | 1 |
| 1. What does mucociliary clearance mean? | Mucociliary clearance refers to the process by which the mucus produced by the cells lining the respiratory tract (such as the nose, throat, and lungs) is moved along by tiny hair-like structures called cilia. These cilia beat in a coordinated manner, sweeping the mucus along with any trapped particles, dust, bacteria, or other foreign material out of the respiratory system.  This process is crucial for maintaining healthy respiratory function because it helps to remove debris, pathogens, and other potentially harmful substances from the airways. Impaired mucociliary clearance can lead to conditions such as chronic bronchitis, cystic fibrosis, and other respiratory diseases where mucus clearance is compromised, leading to increased susceptibility to infections and other respiratory problems. | Consistent | 1 | 1 | 1 |
| 1. What is the development process of the paranasal sinuses? | The development of paranasal sinuses is a complex process that occurs during fetal development and continues into adolescence. Here's a general overview of the development process:   1. **Embryonic Development**: The paranasal sinuses begin to develop during the embryonic stage, around the 8th week of gestation, from the nasal placodes, which are thickened areas of the ectoderm in the developing embryo's face. 2. **Fusion of Nasal Processes**: The nasal processes, which are small protrusions on the sides of the developing face, begin to grow and eventually fuse together to form the midline nasal structure. This fusion process starts around the 6th week of gestation and continues throughout embryonic development. 3. **Sinus Outgrowth**: After the fusion of the nasal processes, small outgrowths called ethmoturbinals develop within the nasal cavity. These outgrowths eventually differentiate into the ethmoidal sinuses. 4. **Pneumatization**: Pneumatization is the process by which air-filled spaces develop within the bones of the skull. This process begins during childhood and continues into adolescence. The paranasal sinuses gradually expand and hollow out within the frontal, ethmoid, sphenoid, and maxillary bones. The exact timing and extent of pneumatization vary among individuals. 5. **Maturation and Growth**: Throughout childhood and adolescence, the paranasal sinuses continue to grow and develop. The sinuses reach their full size and maturity by the late teenage years or early adulthood. 6. **Functional Development**: The paranasal sinuses play various roles, including humidifying and filtering air, enhancing vocal resonance, and reducing the weight of the skull. The functional development of the sinuses occurs concurrently with their anatomical development and continues throughout life.   Throughout this developmental process, genetic factors, environmental influences, and hormonal signals play crucial roles in regulating the growth and maturation of the paranasal sinuses. Additionally, abnormalities or disruptions in any stage of development can lead to congenital sinus disorders or structural variations in the adult sinuses. | Consistent | 1 | 2 | 2 |
| 1. What is the nasal cycle? | The nasal cycle refers to the alternating pattern of congestion and decongestion that naturally occurs within the nasal passages of humans. Throughout the day, the nasal mucosa on each side of the nose swells and shrinks, alternating approximately every 2 to 6 hours. This cycle is regulated by the autonomic nervous system and serves several purposes, including maintaining the health and function of the nasal passages, regulating airflow, and optimizing the sense of smell. The exact mechanisms driving the nasal cycle are not fully understood, but it is believed to involve changes in blood flow and tissue engorgement within the nasal mucosa. | Consistent | 1 | 1 | 1 |
| 1. What is the vomeronasal organ and what is its importance? | The vomeronasal organ (VNO) is a specialized sensory organ found in many animals, including reptiles, amphibians, and mammals, although its presence and functionality vary across species. In mammals, including humans, the VNO is a small, tubular structure located within the nasal cavity. It contains sensory receptor cells that detect chemical signals known as pheromones.  Pheromones are chemical substances produced by animals that can elicit specific behavioral or physiological responses in other members of the same species. These chemical signals play a crucial role in various social and reproductive behaviors, such as mating, territorial marking, and mother-infant bonding.  The importance of the vomeronasal organ lies in its ability to detect these pheromones, allowing animals to communicate with one another through chemical signals. In many species, the VNO contributes to mate selection, social hierarchy establishment, and other aspects of social interaction. However, the role and significance of the VNO in humans are still a topic of debate among scientists, as its functionality and influence on human behavior are not as well understood as in other animals. Some studies suggest that while humans possess a VNO, its role in pheromone detection and behavior regulation may be limited compared to other mammals. | Consistent | 1 | 1 | 1 |
| 1. What is the osteomeatal complex? | The osteomeatal complex is a critical anatomical region within the nasal cavity and paranasal sinuses. It consists of a series of interconnected structures that play a crucial role in the drainage and ventilation of the sinuses. These structures include the ethmoid bulla, the uncinate process, the middle turbinate, and the hiatus semilunaris.  The function of the osteomeatal complex is to facilitate the drainage of mucus from the frontal, maxillary, and anterior ethmoid sinuses into the nasal cavity. When this complex becomes obstructed or dysfunctional, it can lead to conditions such as chronic sinusitis, as impaired drainage can cause mucus buildup and subsequent inflammation within the sinuses.  Understanding the anatomy and function of the osteomeatal complex is important in the diagnosis and management of sinus-related disorders and in surgical interventions aimed at restoring normal sinus drainage and ventilation. | Consistent | 1 | 1 | 1 |
| 1. What are the structures that make up the internal nasal valve? | The internal nasal valve is a critical area within the nasal cavity that regulates airflow. It is primarily composed of several anatomical structures, including:   1. Nasal septum: This is the wall of cartilage and bone that divides the nasal cavity into two chambers. 2. Lateral nasal wall: This includes the inferior turbinate (also known as the inferior nasal concha), which is a curved, shelf-like structure on the outer wall of the nasal cavity. 3. Nasal vestibule: This is the front part of the nasal cavity, just inside the nostrils. 4. Nasal mucosa: This is the lining of the nasal cavity, which contains blood vessels, glands, and cilia. 5. Alar cartilage: These are the cartilages that shape the lower lateral wall of the nose. 6. Nasal valve angle: This refers to the angle formed by the meeting of the nasal septum and the inferior turbinate, which plays a crucial role in airflow dynamics.   These structures work together to regulate airflow, maintain proper nasal function, and facilitate efficient respiration. Dysfunction or abnormalities in any of these structures can lead to nasal obstruction and breathing difficulties. | Consistent | 2 | 2 | 2 |
| 1. What are the structures that make up the external nasal valve? | The external nasal valve is an important anatomical structure located at the entrance of the nose. It is primarily responsible for regulating airflow and maintaining the shape and integrity of the nostrils. The external nasal valve is formed by several structures:   1. Nasal alar cartilage: This is the lower lateral cartilage of the nose, which forms the lower part of the nasal sidewall and contributes to the shape and support of the nostril. 2. Nasal vestibule: This is the area of the nasal cavity just inside the nostrils. It is lined with skin and contains hairs (vibrissae) and sebaceous glands. 3. Nasal sill: This is the area where the alar cartilage meets the upper lip. It helps to define the shape and support of the nostril. 4. Nasal vestibular skin: The skin covering the nasal vestibule plays a role in maintaining the structure and function of the external nasal valve.   These structures work together to regulate airflow and maintain the patency (openness) of the nasal passages. Dysfunction or collapse of the external nasal valve can lead to symptoms such as nasal obstruction or difficulty breathing through the nose. | Consistent | 2 | 2 | 2 |
| 1. What are the most common superior attachment points fort he uncinate and how does the superior attachment of the uncinate relate to the drainage of the frontal sinüs outflow tract? | The uncinate process is a thin, hook-shaped bone located on the lateral wall of the nasal cavity. It plays a role in forming the boundaries of the ethmoidal infundibulum, a passageway for the drainage of the frontal sinus. The superior attachment points of the uncinate process can vary slightly among individuals, but typically, it attaches to:   1. The lateral nasal wall 2. The ethmoid bulla 3. The middle turbinate   The relationship between the superior attachment of the uncinate process and the drainage of the frontal sinus outflow tract is significant in understanding the function of the ethmoidal infundibulum. The uncinate process forms the anterior and medial boundaries of the infundibulum. The frontal sinus drains into the ethmoidal infundibulum, which subsequently leads into the middle meatus, where the outflow tract of the frontal sinus connects.  When the uncinate process is enlarged or obstructed due to inflammation or anatomical variations, it can impede the drainage pathway from the frontal sinus into the nasal cavity. This obstruction can contribute to conditions such as frontal sinusitis or chronic sinusitis, where the normal drainage of mucus and secretions from the frontal sinus is impaired. Therefore, understanding the anatomy and attachment of the uncinate process is crucial in diagnosing and managing sinus-related disorders. | ### **Superior Attachment Points of the Uncinate Process**  The **uncinate process** of the ethmoid bone, a critical part of the lateral nasal wall, plays an essential role in guiding the outflow from the frontal sinus and other sinuses. Its superior attachment can vary, which influences the drainage pathway of the frontal sinus.  #### **Most Common Superior Attachment Points of the Uncinate Process**  1. **Lamina papyracea** (lateral wall of the orbit)  - Most common attachment site (~60% of cases).  - Results in the drainage of the frontal sinus through the **ethmoidal infundibulum** into the middle meatus.  2. **Middle turbinate** (vertical portion)  - Seen in about 20–25% of individuals.  - Directs frontal sinus drainage into the **frontal recess** instead of the ethmoidal infundibulum.  3. **Skull base** (ethmoid roof or cribriform plate)  - Occurs in 10–15% of cases.  - Can narrow the frontal recess, potentially obstructing frontal sinus drainage, increasing the risk of **frontal sinusitis**.  4. **Agger nasi cell**  - In some individuals, the uncinate process attaches to the **agger nasi cell**, a frontal ethmoid air cell located anteriorly.  - This variation affects the size and shape of the frontal recess.  ---  ### **How the Superior Attachment Relates to Frontal Sinus Drainage**  The position of the superior attachment of the uncinate process determines which drainage pathway the frontal sinus takes:  - **Lamina papyracea attachment**  - The frontal sinus drains into the **ethmoidal infundibulum** (a common passage shared with the maxillary sinus).  - More straightforward drainage path, but obstruction of the infundibulum can impact both frontal and maxillary sinuses.  - **Middle turbinate or skull base attachment**  - The frontal sinus drains directly into the **frontal recess**.  - If the frontal recess is narrow or obstructed, it can result in **frontal sinus outflow dysfunction** and increase the risk of sinusitis.  - **Agger nasi cell involvement**  - The size and aeration of the agger nasi cell can influence the width of the frontal recess.  - Larger agger nasi cells may reduce frontal sinus drainage, contributing to obstruction.  In summary, the superior attachment of the uncinate process has a direct impact on how effectively the frontal sinus drains. Variations in this anatomy can either facilitate drainage through the ethmoidal infundibulum or frontal recess—or predispose the individual to sinus disease by obstructing these pathways. | 1 | 3 | 2---1 |
| 1. What are the fie ethmoturbinals, and what do they become? | Ethmoturbinals, also known as nasal turbinate bones or conchae, are bony structures located inside the nasal cavity. They play a crucial role in the respiratory system by helping to humidify, warm, and filter the air we breathe.  There are three pairs of ethmoturbinals:   1. Superior ethmoturbinal 2. Middle ethmoturbinal 3. Inferior ethmoturbinal   Additionally, there are two unpaired structures: 4. Supreme ethmoturbinal (also known as the superior nasal concha or sphenoethmoidal concha)   1. Supreme orificium (also known as the superior concha lamina)   During development, these ethmoturbinals undergo various changes. They primarily arise from the ethmoid bone and contribute to the complex structure of the nasal cavity. As the individual ages, the ethmoturbinals may undergo some degree of pneumatization, where they become more hollow due to the expansion of air cells within them. This process can influence the overall size and shape of the nasal cavity. | Consistent | 4 | 3 | 4 |
| 1. What are the boundaries of the frontal recess? | The frontal recess is a small anatomical region within the frontal sinus. It is bounded by several structures:   1. **Frontal Sinus Ostium**: This is the opening through which the frontal sinus communicates with the nasal cavity. It is located at the anterior part of the frontal recess. 2. **Ethmoid Bulla**: The ethmoid bulla is a rounded prominence on the medial wall of the ethmoid sinus. It lies adjacent to the frontal recess. 3. **Agger nasi cell (anterior ethmoid air cell)**: This is a small air cell located in the anterior ethmoidal air cells. It's often adjacent to the frontal recess. 4. **Uncinate process**: This is a thin, curved bony structure that forms part of the lateral wall of the nasal cavity. It projects downwards and laterally from the ethmoid bulla, partially covering the frontal recess.   These boundaries collectively define the limits of the frontal recess. Dysfunction or obstruction within these structures can lead to frontal sinus disease or inflammation. | The frontal recess is an important anatomic region in the sinonasal cavity, located just below the frontal sinus. Its boundaries are complex due to its proximity to various structures within the nasal cavity. The boundaries of the frontal recess are generally described as follows:  1. **Anterior Boundary**:  - **Agger nasi cell**: This is a prominent anterior ethmoidal air cell that lies anterior to the frontal recess and is considered its anterior boundary.    2. **Posterior Boundary**:  - **Ethmoid bulla**: This is an ethmoidal air cell situated behind the frontal recess, forming its posterior boundary.  3. **Medial Boundary**:  - **Middle turbinate (or middle concha)**: This structure, part of the ethmoid bone, forms the medial boundary of the frontal recess.  4. **Lateral Boundary**:  - **Lamina papyracea**: The thin bony wall that separates the ethmoid air cells from the orbit forms the lateral boundary of the frontal recess.  5. **Superior Boundary**:  - **Frontal sinus**: The floor of the frontal sinus marks the superior boundary of the frontal recess.  6. **Inferior Boundary**:  - **Uncinate process**: A part of the ethmoid bone, the uncinate process helps form the inferior boundary of the frontal recess. It can sometimes extend superiorly and influence the drainage pathway of the frontal sinus.  These boundaries are important for understanding the drainage pathways of the frontal sinus and the complexity of sinus surgery, particularly for procedures like functional endoscopic sinus surgery (FESS). | 2 | 2 | 2---1 |
| 1. Describe the four Kuhn types of penumatization. | Kuhn's classification system for pneumatization refers to the various ways in which the paranasal sinuses develop and extend within the skull. These classifications are named after the German anatomist Gustav Kuhn, who extensively studied the anatomy of the paranasal sinuses. There are four types of pneumatization according to Kuhn's classification:   1. **Type I - Simple**: In Type I pneumatization, only the maxillary sinus is present. This is the most basic form of pneumatization and is characterized by the presence of a single sinus, the maxillary sinus, which is located within the maxillary bone. The maxillary sinus is the largest of the paranasal sinuses and is situated below the orbits of the eyes. 2. **Type II - Bifid**: Type II pneumatization involves the presence of two sinuses: the maxillary sinus and the frontal sinus. In this type, the frontal sinus extends into the frontal bone, usually in a symmetrical manner, resulting in a bifid frontal sinus. The maxillary sinus remains as in Type I. 3. **Type III - Complete**: Type III pneumatization is characterized by the presence of all four paranasal sinuses: the maxillary sinus, the frontal sinus, the ethmoidal sinuses, and the sphenoidal sinus. In this type, all four sinuses are fully developed and pneumatised, occupying their respective areas within the bones of the skull. 4. **Type IV - Partial or Incomplete**: Type IV pneumatization involves incomplete development or absence of one or more sinuses. This can manifest in various ways, such as hypoplasia (underdevelopment) of one or more sinuses, or complete absence of a specific sinus. Type IV pneumatization is the most variable type and may exhibit a range of configurations depending on the degree of development or absence of individual sinuses.   These classifications are useful for understanding the variations in paranasal sinus anatomy and can have implications for surgical procedures, radiological interpretation, and the management of sinus-related disorders. | Consistent | 4 | 4 | 4 |
| 1. Describe the four surgical landmarks to help safely identify the natural ostium of the sphenoid sinüs. | Identifying the natural ostium of the sphenoid sinus is crucial during endoscopic sinus surgery to ensure proper access and avoid damage to surrounding structures. There are four surgical landmarks that can help safely locate the natural ostium of the sphenoid sinus:   1. **Sphenoid Sinus Pneumatization Patterns**: Understanding the variations in pneumatization patterns of the sphenoid sinus is essential. The sphenoid sinus can have various pneumatization patterns, such as conchal, presellar, sellar, postsellar, and conchal-presellar. These patterns dictate the location and size of the natural ostium. 2. **Sellar Floor**: The sellar floor is a prominent bony landmark that forms the roof of the sphenoid sinus. It can be palpated as a flat surface superior to the posterior nasal cavity. The natural ostium is typically located along the superior aspect of the sellar floor, just beneath the skull base. 3. **Sphenopalatine Artery (SPA)**: The SPA is a key vascular landmark that runs along the lateral wall of the sphenoid sinus. Its position relative to the natural ostium can serve as a guide during surgery. Typically, the SPA is located anterior and inferior to the ostium, helping to identify its approximate location. 4. **Sphenoid Recess of the Posterior Nasal Cavity**: The sphenoid recess is a concave area in the posterior nasal cavity, representing the anterior wall of the sphenoid sinus. It is bounded laterally by the superior turbinate and medially by the nasal septum. The natural ostium is situated within or just superior to this recess.   By carefully evaluating these surgical landmarks, surgeons can accurately locate the natural ostium of the sphenoid sinus, facilitating safe and effective endoscopic sinus surgery while minimizing the risk of complications. | To safely identify the **natural ostium of the sphenoid sinus** during surgery, four key surgical landmarks are used:  ### 1. **Superior Turbinate**  - The superior turbinate is a small bony structure located above the middle turbinate.  - The **natural ostium of the sphenoid sinus** lies just medial (or posterior-medial) to the superior turbinate. Identifying and following this structure helps guide the surgeon towards the ostium.  ### 2. **Choana**  - The choana refers to the posterior opening of the nasal cavity into the nasopharynx.  - The ostium is found **superior and medial** to the choana. This serves as a spatial reference, especially during endoscopic approaches.  ### 3. **Posterior Wall of the Ethmoid Sinus**  - The natural ostium lies **posterior to the posterior ethmoidal air cells**. The ethmoid sinus forms the anterior boundary for the sphenoid sinus, so recognizing the posterior wall of the ethmoid helps orient the surgeon.  ### 4. **Nasoseptal Ridge** (or Sphenoethmoidal Recess)  - The nasoseptal ridge runs along the junction between the **nasal septum and the superior turbinate**.  - The sphenoid ostium is located near this ridge, specifically within or close to the sphenoethmoidal recess, providing a useful anatomical guide.  Using these four landmarks during functional endoscopic sinus surgery (FESS) allows the surgeon to navigate precisely, reducing the risk of injury to surrounding structures like the optic nerve or internal carotid artery. | 3 | 3 | 3---2 |
| 1. What is the importance of Keros’ Classification? | Keros' Classification is a system used in maxillofacial surgery to categorize the location of the floor of the maxillary sinus relative to the roots of the upper molars and premolars. This classification, developed by Keros in 1968, is based on the depth of the maxillary sinus and its relationship to the maxillary tooth roots. It divides the maxillary sinus into three types:   1. Type I: The floor of the maxillary sinus is located below the apices of the maxillary teeth. 2. Type II: The floor of the maxillary sinus is located at or above the level of the apices of the maxillary teeth. 3. Type III: The floor of the maxillary sinus is located significantly above the apices of the maxillary teeth.   The importance of Keros' Classification lies in its clinical relevance for various procedures involving the maxillary sinus, particularly in the fields of otolaryngology, dentistry, and maxillofacial surgery. Some of the key reasons why this classification is important include:   1. **Surgical Planning**: Understanding the depth of the maxillary sinus relative to the roots of the teeth is crucial for surgical planning, particularly for procedures such as sinus lifts, dental implants, and orthognathic surgeries. Surgeons need to know the location of the maxillary sinus to avoid complications during these procedures. 2. **Implant Placement**: For dental implant placement in the posterior maxilla, knowledge of the proximity of the maxillary sinus and the position of its floor is essential. Keros' Classification helps dentists determine whether additional procedures, such as sinus augmentation or bone grafting, are necessary to ensure the success of dental implant placement. 3. **Diagnosis and Treatment of Sinus Pathologies**: Keros' Classification aids in diagnosing and treating various pathologies associated with the maxillary sinus. Understanding the relationship between the sinus floor and dental structures helps in interpreting radiographic images and planning appropriate treatments for conditions such as sinusitis, cysts, and tumors. 4. **Reducing Risk of Complications**: By providing a standardized way to assess the anatomy of the maxillary sinus, Keros' Classification helps reduce the risk of complications during surgical procedures. Surgeons can anticipate potential challenges and take necessary precautions to minimize complications such as sinus membrane perforation or damage to adjacent structures.   Overall, Keros' Classification serves as a valuable tool for clinicians involved in maxillofacial surgery and related fields, guiding treatment decisions and improving patient outcomes by ensuring safe and effective management of maxillary sinus-related issues. | Consistent | 4 | 4 | 4 |
| 1. Describe the sympathetic and parasympathetic innervation of nose. | The nose receives both sympathetic and parasympathetic innervation, which regulate various physiological functions related to nasal tissue.   1. **Sympathetic Innervation**:    - Sympathetic innervation of the nose originates from the superior cervical ganglion, which is part of the sympathetic trunk of the autonomic nervous system.    - Sympathetic nerves innervate the blood vessels within the nasal mucosa, controlling their constriction and dilation.    - Activation of the sympathetic nervous system causes vasoconstriction in the blood vessels of the nasal mucosa, leading to reduced blood flow. This can result in decreased nasal congestion.    - Additionally, sympathetic innervation plays a role in regulating the secretion of mucus from nasal glands. 2. **Parasympathetic Innervation**:    - Parasympathetic innervation of the nose is primarily mediated by the facial nerve (CN VII) and, to a lesser extent, the glossopharyngeal nerve (CN IX).    - Parasympathetic nerves innervate the glands of the nasal mucosa, controlling their secretion of mucus.    - Activation of the parasympathetic nervous system stimulates the secretion of watery mucus from nasal glands, contributing to the moistening and lubrication of the nasal passages.    - Parasympathetic innervation also influences nasal gland secretion during processes such as nasal congestion and inflammation.   In summary, sympathetic innervation of the nose regulates blood flow and mucus secretion, while parasympathetic innervation primarily controls the secretion of mucus to maintain nasal moisture and lubrication. These dual innervations work in concert to maintain nasal homeostasis and respond to various physiological and environmental stimuli. | Consistent | 2 | 1 | 2 |
| Acute Rhinosinusitis |  |  |  |  |  |
| 1. What are the diagnostic criteria for acute rhinosinusitis? | Acute rhinosinusitis is typically diagnosed based on a combination of clinical symptoms and signs. The diagnosis is made when a patient presents with symptoms consistent with acute rhinosinusitis and meets certain criteria. The diagnostic criteria commonly used include:   1. **Symptoms**: The presence of symptoms such as nasal congestion, nasal discharge (purulent or discolored), facial pain, pressure, or fullness, and/or hyposmia or anosmia (reduced or loss of smell). 2. **Duration**: Symptoms persisting for less than 4 weeks. Acute rhinosinusitis is characterized by a sudden onset and usually resolves within this timeframe. 3. **Signs**: Signs of inflammation may be present upon examination, such as erythema (redness) or swelling of the nasal mucosa, and tenderness over the affected sinuses. 4. **Additional findings**: Sometimes, additional findings such as fever (though this is not always present), fatigue, cough, or dental pain may also be present, suggesting involvement of adjacent structures.   It's important to note that while these criteria are commonly used, the diagnosis of acute rhinosinusitis is primarily clinical, and imaging studies such as sinus X-rays or CT scans are not routinely required for diagnosis in uncomplicated cases. These imaging studies may be reserved for cases that are severe, persistent, or atypical, or when complications are suspected. Additionally, in some cases, further evaluation or referral to an otolaryngologist (ENT specialist) may be warranted, especially if symptoms are severe, recurrent, or do not respond to initial treatment. | Consistent | 2 | 2 | 2 |
| 1. Is there a certain duration of symptoms in the diagnosis of acute bacterial rhinosinusitis? | Yes, there are certain duration criteria used in the diagnosis of acute bacterial rhinosinusitis (ABRS). According to clinical guidelines, ABRS is typically diagnosed when symptoms persist for at least 10 days without improvement or worsen after an initial viral upper respiratory infection that lasted 5-7 days. This duration criterion helps differentiate ABRS from viral rhinosinusitis, which often resolves within a week without antibiotics. However, it's important to note that these duration criteria may vary slightly depending on specific clinical guidelines and individual patient circumstances. | Consistent | 1 | 1 | 1 |
| 1. What are the most common viral and bacterial pathogens associated with the acute rhinosinusitis? | Acute rhinosinusitis, commonly known as a sinus infection, can be caused by both viral and bacterial pathogens. Here are some of the most common viral and bacterial pathogens associated with acute rhinosinusitis:   1. Viral Pathogens:    - Rhinovirus: Rhinoviruses are the most common cause of viral sinusitis. They are responsible for the majority of common colds and upper respiratory tract infections.    - Influenza virus: Influenza viruses, particularly influenza A and B, can cause acute sinusitis, especially during flu seasons.    - Adenovirus: Adenoviruses can cause a wide range of respiratory illnesses, including sinusitis.    - Respiratory syncytial virus (RSV): RSV primarily affects young children and can lead to sinusitis as part of its respiratory manifestations. 2. Bacterial Pathogens:    - Streptococcus pneumoniae: This bacterium is one of the most common causes of bacterial sinusitis, especially in adults.    - Haemophilus influenzae: Haemophilus influenzae, particularly non-typeable strains, is another common bacterial pathogen associated with sinus infections.    - Moraxella catarrhalis: Moraxella catarrhalis is frequently isolated in cases of acute bacterial sinusitis, especially in children and adults with chronic respiratory conditions.    - Staphylococcus aureus: While less common than the aforementioned pathogens, Staphylococcus aureus can also cause bacterial sinusitis, especially in individuals with compromised immune systems or underlying medical conditions.   It's important to note that distinguishing between viral and bacterial sinusitis can be challenging based solely on clinical symptoms, and healthcare providers may need to rely on additional diagnostic tests to determine the underlying cause and guide appropriate treatment. Additionally, acute sinusitis can sometimes result from a combination of viral and bacterial infections. | Consistent | 1 | 1 | 1 |
| 1. What are the recommended medical treatments for acute bacterial rhinosinusitis? | Acute bacterial rhinosinusitis (ABRS) refers to a bacterial infection of the paranasal sinuses that typically follows a viral upper respiratory tract infection. Treatment for ABRS typically involves antibiotics, decongestants, analgesics, and supportive care. Here's a breakdown of recommended medical treatments:   1. **Antibiotics**: Antibiotics are often prescribed to treat bacterial sinus infections. The choice of antibiotic depends on factors such as local resistance patterns, patient allergies, and severity of symptoms. Commonly prescribed antibiotics for ABRS include:    - Amoxicillin    - Amoxicillin-clavulanate (Augmentin)    - Doxycycline    - Trimethoprim-sulfamethoxazole (Bactrim) 2. **Decongestants**: Decongestants help relieve nasal congestion by constricting blood vessels in the nasal passages, reducing swelling and mucus production. They can be used orally or as nasal sprays. Common decongestants include:    - Oral pseudoephedrine    - Oral phenylephrine    - Nasal oxymetazoline    - Nasal phenylephrine 3. **Analgesics**: Pain relievers are often recommended to alleviate facial pain, headache, and sinus pressure associated with ABRS. Commonly used analgesics include:    - Acetaminophen (Tylenol)    - Ibuprofen (Advil, Motrin)    - Naproxen (Aleve) 4. **Nasal saline irrigation**: Nasal saline irrigation can help clear nasal passages, reduce congestion, and promote sinus drainage. This can be done using a saline solution and a neti pot or nasal spray bottle. 5. **Topical nasal corticosteroids**: In cases of persistent symptoms or chronic rhinosinusitis, topical nasal corticosteroids may be prescribed to reduce inflammation and swelling in the nasal passages. Common examples include fluticasone (Flonase), mometasone (Nasonex), and budesonide (Rhinocort). 6. **Antipyretics**: If the patient has fever, antipyretic medications such as acetaminophen or ibuprofen can help reduce body temperature. 7. **Fluids and rest**: Adequate hydration and rest are important to support the body's immune response and aid in recovery.   It's essential for patients to follow their healthcare provider's recommendations regarding treatment duration and follow-up. Additionally, it's important to finish the full course of antibiotics, even if symptoms improve before the medication is completed, to prevent recurrence and antibiotic resistance. | Consistent | 1 | 1 | 1 |
| 1. What signs and symptoms are the indications for starting antibiotic treatment in adults and pediatric population with acute bacterial shinosiinusitis? | Acute bacterial rhinosinusitis (ABRS) is often diagnosed clinically based on the presence of certain signs and symptoms. The indications for starting antibiotic treatment in both adults and pediatric populations with ABRS typically include:   1. Persistence or worsening of symptoms: If symptoms persist or worsen beyond a certain duration, typically beyond 7-10 days in adults and beyond 10-14 days in children, despite supportive care (such as saline nasal irrigation, analgesics, decongestants), antibiotic therapy may be warranted. 2. Severe or worsening symptoms: Severe symptoms such as high fever (>102°F or 38.9°C), severe headache, facial pain or pressure, purulent nasal discharge, or dental pain may indicate bacterial infection and necessitate antibiotic treatment. 3. Systemic symptoms: Presence of systemic symptoms such as fatigue, malaise, or significant impairment of daily activities can suggest a bacterial etiology and may warrant antibiotic therapy. 4. Clinical findings suggestive of bacterial infection: Clinical signs such as unilateral facial pain, purulent nasal discharge, or worsening symptoms after initial improvement can raise suspicion for bacterial rhinosinusitis and may prompt antibiotic therapy. 5. Complications: Signs of complications such as periorbital cellulitis, orbital cellulitis, subperiosteal abscess, or intracranial involvement require prompt antibiotic treatment along with possible surgical intervention. 6. Immune compromise: Patients with compromised immune systems (e.g., HIV infection, immunosuppressive therapy) are at higher risk of complications and may require earlier initiation of antibiotic therapy.   It's important to note that antibiotic therapy should be prescribed judiciously, considering the severity of symptoms, risk factors, and potential for bacterial resistance. Additionally, guidelines may vary slightly between different medical societies, so it's essential to follow the recommendations provided by relevant clinical guidelines or local protocols. Always consult a healthcare professional for accurate diagnosis and appropriate management. | Consistent | 1 | 1 | 1 |
| 1. What are the first and second line antibiotic treatment that recommended for acute bacterial rhinosinusitis? Please indicate the dosage of the antibiotics. | The first-line antibiotic treatment recommended for acute bacterial rhinosinusitis typically includes:   1. Amoxicillin:    - Dosage: 500 mg orally three times a day or 875 mg orally twice a day for 5-7 days.   If the patient has a penicillin allergy or if they have recently been treated with amoxicillin, the following antibiotic can be considered:   1. Doxycycline:    - Dosage: 100 mg orally twice a day for 5-7 days.   These recommendations may vary based on the specific guidelines provided by healthcare organizations or the preferences of the treating physician. It's essential for patients to consult their healthcare providers for personalized recommendations and dosages. | Consistent | 2 | 2 | 2 |
| 1. Is there a place for surgery in the treatment of acute rhinosinusitis? | Acute rhinosinusitis (ARS) typically presents with symptoms such as facial pain, nasal congestion, nasal discharge, and sometimes fever. In the vast majority of cases, acute rhinosinusitis is managed conservatively with medical treatments such as antibiotics, nasal decongestants, saline irrigation, and pain relievers. However, surgery may be considered in certain cases of acute rhinosinusitis, particularly when complications arise or when conservative treatments fail to resolve the condition. Some scenarios where surgery might be considered include:   1. Complications: If acute rhinosinusitis leads to complications such as orbital cellulitis, subperiosteal abscess, intracranial abscess, or cavernous sinus thrombosis, surgical intervention may be necessary to drain the infected material and prevent further spread of the infection. 2. Recurrent or Chronic Sinusitis: If a patient experiences recurrent episodes of acute rhinosinusitis or if the condition becomes chronic despite appropriate medical therapy, surgical options such as endoscopic sinus surgery may be considered to address underlying anatomical issues contributing to sinus blockage and inflammation. 3. Structural Abnormalities: Some individuals may have structural abnormalities within the nasal passages or sinuses that predispose them to recurrent or severe episodes of sinusitis. Surgery to correct these abnormalities, such as septoplasty (for deviated nasal septum) or turbinate reduction, may improve sinus drainage and reduce the frequency or severity of sinusitis episodes. 4. Allergic Fungal Rhinosinusitis: In cases of allergic fungal rhinosinusitis, where the sinuses are colonized by fungi and cause chronic inflammation, surgery may be necessary to remove fungal debris and diseased tissue from the sinuses. 5. Mucoceles: Mucoceles are benign cystic lesions that can develop within the sinuses, often as a result of chronic inflammation or obstruction of the sinus drainage pathways. Surgical removal of mucoceles may be required to alleviate symptoms and prevent complications.   It's important to note that surgical intervention for acute rhinosinusitis is relatively rare and is typically reserved for specific situations where conservative management has been ineffective or when complications or underlying structural issues are present. The decision to proceed with surgery should be made in consultation with an otolaryngologist (ear, nose, and throat specialist) based on a thorough evaluation of the individual patient's condition and medical history. | Consistent | 1 | 1 | 1 |
| 1. Describe and classify the comlications of acute bacterial rhinosinusitis? | Acute bacterial rhinosinusitis (ABRS) refers to a bacterial infection of the paranasal sinuses, typically occurring following a viral upper respiratory tract infection. Complications of ABRS can vary in severity and can be classified into several categories:   1. **Local Complications:**    - **Orbital Complications:** These involve structures within the orbit (eye socket) and can include:      - Orbital cellulitis: Infection and inflammation of the soft tissues around the eye.      - Subperiosteal abscess: Collection of pus between the periosteum and the bone of the orbit.      - Orbital abscess: Collection of pus within the orbit.      - Ophthalmoplegia: Paralysis or weakness of the eye muscles, resulting in limited eye movement.    - **Intracranial Complications:** These involve structures within the skull and can include:      - Meningitis: Inflammation of the membranes surrounding the brain and spinal cord.      - Epidural abscess: Collection of pus between the dura mater and the skull.      - Subdural empyema: Collection of pus between the dura mater and the arachnoid membrane.      - Brain abscess: Collection of pus within brain tissue.    - **Osteomyelitis:** Infection and inflammation of the bones of the skull, particularly the frontal bone (frontal osteomyelitis) or the ethmoid bone (ethmoiditis).    - **Mucocele:** A mucus-filled cyst typically forming in the paranasal sinuses due to obstruction of the sinus ostia. 2. **Systemic Complications:**    - **Sepsis:** Systemic inflammatory response to infection that can lead to organ dysfunction and failure.    - **Toxic Shock Syndrome (TSS):** A severe complication characterized by a systemic response to bacterial toxins, leading to fever, rash, low blood pressure, and organ failure.    - **Septic Thrombophlebitis:** Inflammation and clot formation in the veins draining the sinuses, which can lead to the spread of infection to other parts of the body. 3. **Functional Complications:**    - **Chronic Rhinosinusitis:** Prolonged inflammation of the sinuses lasting more than 12 weeks, which can result from inadequately treated or recurrent acute episodes.    - **Mucosal Damage:** Persistent inflammation and scarring of the sinus mucosa, leading to impaired sinus drainage and recurrent infections.   Complications of ABRS can vary widely in severity and require prompt recognition and management to prevent serious morbidity and mortality. Prompt diagnosis, appropriate antibiotic therapy, and, in severe cases, surgical intervention are essential in managing ABRS and preventing complications. | ### Complications of Acute Bacterial Rhinosinusitis (ABRS)  Acute bacterial rhinosinusitis (ABRS) can lead to various **localized** and **systemic** complications, particularly if left untreated or if there is resistance to antibiotics. These complications arise due to the spread of infection to adjacent structures through direct extension, hematogenous routes, or through the bones and sinuses. They can be classified into **local, orbital, and intracranial** complications. Below is a breakdown of the common complications:  ---  ### **1. Local Complications**  These complications occur within the nasal cavity or surrounding sinuses.  - **Chronic sinusitis**: Persistent infection leading to recurrent or chronic inflammation (>12 weeks).  - **Osteomyelitis**: Infection of the bones, particularly the frontal bone (Pott’s puffy tumor) resulting in swelling of the forehead and underlying bone erosion.  - **Mucocele or Pyocele**: Collection of mucus or pus within a sinus, causing bony expansion and pressure on surrounding structures.  ---  ### **2. Orbital Complications**  The close proximity of the sinuses, especially the ethmoid and maxillary sinuses, to the orbit can lead to orbital infections.  - **Preseptal cellulitis**: Infection localized to the eyelid and surrounding soft tissues, without involvement of the orbital contents.  - **Orbital cellulitis**: Infection involving the orbital contents, leading to swelling, redness, pain, and potentially decreased eye movement.  - **Subperiosteal abscess**: Accumulation of pus between the periosteum and orbital bones, causing eye displacement and restricted movement.  - **Orbital abscess**: A severe collection of pus within the orbit, which can lead to vision loss if not treated promptly.  - **Cavernous sinus thrombosis**: Rare but life-threatening, involving clot formation in the cavernous sinus due to infection spread, often accompanied by severe headache, eye pain, proptosis (bulging eye), and cranial nerve palsies.  ---  ### **3. Intracranial Complications**  The infection can extend to the brain through hematogenous spread, via bone erosion, or through natural foramina.  - **Meningitis**: Infection of the meninges, presenting with headache, fever, neck stiffness, and altered mental status.  - **Brain abscess**: A localized collection of pus within the brain parenchyma, often associated with severe headache, neurological deficits, or seizures.  - **Epidural abscess**: Accumulation of pus between the dura mater and skull, causing headache and potential signs of raised intracranial pressure.  - **Subdural empyema**: A collection of pus between the dura and arachnoid mater, often causing rapid neurological deterioration.  ---  ### **Systemic Complications**  Although rare, systemic complications can arise from uncontrolled infection.  - **Sepsis**: Infection spreads into the bloodstream, leading to systemic inflammatory response and potentially multi-organ failure.  - **Lemierre’s syndrome**: Septic thrombophlebitis of the internal jugular vein, often associated with metastatic abscesses in the lungs.  ---  ### **Classification of Complications**  1. **Local complications**: Chronic sinusitis, osteomyelitis, mucoceles.  2. **Orbital complications**: Preseptal cellulitis, orbital cellulitis, subperiosteal abscess, orbital abscess, cavernous sinus thrombosis.  3. **Intracranial complications**: Meningitis, brain abscess, epidural abscess, subdural empyema.  4. **Systemic complications**: Sepsis, Lemierre’s syndrome.  ---  ### **Conclusion**  The complications of acute bacterial rhinosinusitis can range from mild to life-threatening. Early diagnosis and prompt treatment (antibiotics, drainage of abscesses, or surgical intervention if necessary) are crucial to prevent morbidity and mortality associated with severe complications. | 1 | 3 | 2---1 |
| 1. What are the indications of surgery in orbital complications of acute bacterial rhinosinusitis? | Orbital complications of acute bacterial rhinosinusitis can necessitate surgical intervention in certain cases. These complications can be serious and may require prompt medical attention. The indications for surgery in such cases include:   1. **Orbital Cellulitis**: If there is evidence of orbital cellulitis with significant inflammation and infection spreading to the tissues around the eye, surgical drainage may be necessary to alleviate pressure and remove infected material. 2. **Subperiosteal Abscess**: When an abscess forms between the periosteum and the bone of the orbit, causing pressure on the eye and surrounding structures, surgical drainage is often required to evacuate the pus and alleviate the pressure. 3. **Intraorbital Abscess**: If an abscess forms within the tissues of the orbit itself, surgical drainage may be necessary to remove the pus and prevent further damage to the eye and surrounding structures. 4. **Orbital Decompression**: In cases of severe orbital swelling and pressure, orbital decompression surgery may be performed to relieve pressure on the optic nerve and surrounding structures. This can help prevent vision loss and other serious complications. 5. **Endoscopic Sinus Surgery**: In cases where the sinus infection is contributing to orbital complications, endoscopic sinus surgery may be performed to drain the sinuses and remove infected tissue, reducing the risk of further orbital involvement. 6. **Repair of Orbital Wall Fractures**: If there are fractures of the orbital walls causing communication between the sinuses and the orbit, surgical repair may be necessary to prevent complications such as enophthalmos (sunken eye) and diplopia (double vision). 7. **Debridement of Necrotic Tissue**: In cases where there is necrotic tissue within the orbit due to severe infection, surgical debridement may be necessary to remove the dead tissue and prevent further spread of infection.   In summary, the indications for surgery in orbital complications of acute bacterial rhinosinusitis depend on the specific nature and severity of the complication, and the goal is to relieve pressure, drain abscesses, prevent further spread of infection, and preserve vision and orbital function. Prompt diagnosis and appropriate management by a multidisciplinary team including otolaryngologists, ophthalmologists, and possibly neurosurgeons are essential for optimal outcomes. | Consistent | 2 | 1 | 2 |
| 1. What structures are responsible for the intracranial spread of frontal sinusitis? | Frontal sinusitis can potentially spread intracranially through several anatomical structures:   1. **Frontal Bone**: The frontal sinus is located within the frontal bone of the skull. In cases of severe infection or untreated sinusitis, the infection can erode through the bone, allowing it to spread into nearby intracranial structures. 2. **Frontal Sinus Ostium**: This is the opening of the frontal sinus into the nasal cavity. Inflammation or blockage of this opening can lead to accumulation of infected material within the sinus, which can potentially spread intracranially. 3. **Frontal Recess**: This is the space in the skull where the frontal sinus drains into the nasal cavity. Infections can spread from the frontal sinus through this pathway. 4. **Periosteum and Dura Mater**: These are the membranes that cover the bones of the skull and the brain, respectively. If the infection breaches the bone, it can lead to inflammation and infection of these membranes, potentially causing intracranial complications such as meningitis or brain abscess. 5. **Venous Sinuses**: The veins of the scalp and face drain into venous sinuses within the skull, including the superior sagittal sinus and the cavernous sinuses. Infections can potentially spread through these venous channels, leading to intracranial complications.   Intracranial spread of frontal sinusitis can result in serious complications such as meningitis, brain abscess, epidural abscess, subdural empyema, or cavernous sinus thrombosis. It's important to promptly diagnose and treat frontal sinusitis to prevent these complications. | Consistent | 1 | 2 | 2 |
|  |  |  |  |  |  |
| Chronic Rhinosinusitis |  |  |  |  |  |
| 1. What are the diagnostic criteria for chronic rhinosinusitis? | Chronic rhinosinusitis (CRS) is a common condition characterized by inflammation of the nasal passages and the sinuses that persists for an extended period, typically 12 weeks or longer. The diagnosis of CRS is primarily clinical and is based on a combination of symptoms, physical examination findings, and, in some cases, imaging studies. The diagnostic criteria for CRS include:   1. **Symptoms**: The patient should have two or more of the following symptoms, one of which should be nasal blockage, nasal discharge, facial pain/pressure, or reduction/loss of smell:    - Nasal blockage or obstruction    - Nasal discharge, which can be anterior or posterior nasal drip    - Facial pain or pressure    - Reduction or loss of smell (anosmia or hyposmia) 2. **Duration**: Symptoms persist for at least 12 consecutive weeks. 3. **Physical Examination Findings**: On physical examination, signs of nasal inflammation or polyps may be observed. These signs may include:    - Nasal congestion or obstruction    - Nasal discharge or postnasal drip    - Swollen or inflamed nasal mucosa    - Presence of nasal polyps (in some cases) 4. **Imaging Studies**: While not always necessary for diagnosis, imaging studies such as computed tomography (CT) scans of the paranasal sinuses may be used to evaluate the extent and severity of sinus involvement. Imaging findings supportive of CRS include:    - Mucosal thickening of the sinuses    - Air-fluid levels within the sinuses    - Opacification of the sinuses    - Presence of sinus polyps (if present) 5. **Exclusion of Other Conditions**: Other conditions that can mimic the symptoms of CRS should be excluded, such as allergic rhinitis, acute viral rhinosinusitis, fungal rhinosinusitis, nasal septal deviation, or nasal tumors. 6. **Persistence of Symptoms**: Symptoms persist despite appropriate medical treatment, which may include nasal corticosteroids, saline irrigation, antibiotics, and/or oral corticosteroids.   It's essential to consider that the diagnosis of CRS is multifactorial and requires a comprehensive assessment of the patient's symptoms, physical examination findings, and, in some cases, imaging studies to establish the diagnosis accurately. Therefore, consultation with an otolaryngologist (ear, nose, and throat specialist) may be necessary for confirmation and management of CRS. | Consistent | 1 | 1 | 1 |
| 1. What are the endoscopy findings of chronic rhinosinusitis? | Chronic rhinosinusitis (CRS) is a condition characterized by inflammation of the nasal passages and sinuses that lasts for an extended period, typically more than 12 weeks. Endoscopy, specifically nasal endoscopy, is a common diagnostic tool used by ear, nose, and throat (ENT) specialists to evaluate the nasal and sinus cavities. The findings of endoscopy in chronic rhinosinusitis may include:   1. Nasal Polyps: These are soft, noncancerous growths that develop on the lining of the nasal passages or sinuses. They can vary in size and number and are often seen in cases of chronic inflammation, such as chronic rhinosinusitis. 2. Mucosal Edema: Inflammation of the mucous membranes lining the nasal and sinus cavities can lead to swelling (edema), which may be observed during endoscopic examination. 3. Mucopurulent Drainage: Chronic inflammation can cause increased production of mucus, which may appear thick and discolored (yellow or green) due to the presence of white blood cells and bacteria. This drainage may be visible during endoscopy. 4. Scarring: Prolonged inflammation and repeated episodes of acute sinusitis can lead to tissue damage and scarring within the nasal and sinus cavities. Endoscopic examination may reveal evidence of scarring, which can affect sinus function. 5. Erosions or Ulcers: Severe or longstanding inflammation can sometimes result in erosions or ulcers on the mucosal surfaces of the nasal passages or sinuses. These abnormalities may be visualized during endoscopy. 6. Congestion or Blockage: Chronic rhinosinusitis often leads to nasal congestion or obstruction due to swelling of the nasal tissues or the presence of polyps. Endoscopic examination can help assess the degree of obstruction and identify contributing factors. 7. Fungal Infections: In some cases of chronic rhinosinusitis, particularly those that are refractory to standard treatments, fungal infections may be present. Endoscopy can aid in the identification of fungal growths or characteristic findings such as allergic mucin.   These findings observed during endoscopy can help clinicians diagnose and characterize chronic rhinosinusitis, guide treatment decisions, and monitor the response to therapy. Additionally, imaging studies such as CT scans may be performed to further evaluate the extent of sinus involvement and help guide treatment planning. | Consistent | 1 | 1 | 1 |
| 1. What are the symptoms of chronic rhinosinusitis? | Chronic rhinosinusitis is a condition characterized by inflammation of the nasal passages and sinuses lasting for at least 12 weeks. The symptoms of chronic rhinosinusitis can vary from person to person but commonly include:   1. **Nasal congestion**: Difficulty breathing through the nose due to blockage or swelling of the nasal passages. 2. **Nasal discharge**: Thick, discolored mucus drainage from the nose or down the back of the throat (postnasal drip). 3. **Facial pain or pressure**: A feeling of pressure or pain in the cheeks, forehead, or around the eyes. This discomfort may worsen with bending forward or lying down. 4. **Reduced sense of smell (hyposmia) or taste**: Difficulty smelling or tasting as a result of nasal congestion and inflammation. 5. **Cough**: A persistent cough, especially at night, due to postnasal drip irritating the throat. 6. **Fatigue**: Chronic rhinosinusitis can cause fatigue due to disrupted sleep patterns from symptoms like nasal congestion and coughing. 7. **Ear pain or pressure**: Some individuals may experience ear discomfort or pressure due to congestion affecting the Eustachian tubes, which connect the nose to the ears. 8. **Headache**: Pain or pressure in the forehead, around the eyes, or in the temples may develop as a result of sinus inflammation. 9. **Sore throat**: Postnasal drip can lead to irritation of the throat, causing a sore or scratchy throat. 10. **Bad breath (halitosis)**: Bacterial growth in the sinuses due to congestion and mucus buildup can result in foul-smelling breath.   It's important to note that while these are common symptoms of chronic rhinosinusitis, they can also be indicative of other conditions. A proper diagnosis by a healthcare professional is essential for appropriate management and treatment. | Consistent | 1 | 1 | 1 |
| 1. Describe the medical treatment of chronic rhinosinusitis. | The medical treatment of chronic rhinosinusitis typically involves a combination of pharmacotherapy, nasal irrigation, and potentially other non-invasive interventions. Here's a breakdown of the common approaches:   1. **Nasal Corticosteroids**: These are often the first line of treatment and work by reducing inflammation in the nasal passages and sinuses. Examples include fluticasone (Flonase), mometasone (Nasonex), and budesonide (Rhinocort). 2. **Antibiotics**: Antibiotics may be prescribed if there is evidence of bacterial infection or if symptoms persist despite other treatments. Commonly used antibiotics include amoxicillin-clavulanate (Augmentin), doxycycline, and levofloxacin. 3. **Saline Nasal Irrigation**: This involves rinsing the nasal passages with a saline solution to help clear mucus and reduce inflammation. It can be done using a neti pot, squeeze bottle, or nasal irrigation system. 4. **Decongestants**: Oral or nasal decongestants may be used to relieve nasal congestion and improve breathing. However, they are generally not recommended for long-term use due to the risk of rebound congestion. 5. **Antihistamines**: These may be prescribed if allergies are contributing to symptoms of chronic rhinosinusitis. Antihistamines work by blocking the effects of histamine, which is released during allergic reactions. Examples include loratadine (Claritin) and cetirizine (Zyrtec). 6. **Topical Nasal Decongestants**: These are nasal sprays that provide temporary relief from nasal congestion by constricting blood vessels in the nasal passages. However, they should be used sparingly and for short periods to avoid rebound congestion and dependency. 7. **Leukotriene Modifiers**: These medications may be prescribed in some cases to reduce inflammation in the airways and sinuses. Montelukast (Singulair) is an example of a leukotriene modifier. 8. **Mucolytics**: These medications help thin mucus, making it easier to clear from the sinuses. Examples include guaifenesin (Mucinex) and acetylcysteine. 9. **Allergen Immunotherapy**: For individuals with allergic rhinosinusitis, allergen immunotherapy (allergy shots or tablets) may be recommended to desensitize the immune system to specific allergens. 10. **Steroid Nasal Sprays**: In some cases, a short course of oral corticosteroids may be prescribed to quickly reduce inflammation and relieve symptoms. However, long-term use of oral steroids is generally avoided due to the risk of side effects. 11. **Immunomodulators**: Biologic agents like omalizumab may be considered in severe cases of chronic rhinosinusitis with nasal polyps that are refractory to other treatments. 12. **Surgery**: In cases where medical treatment fails to provide relief or if there are structural abnormalities obstructing the sinuses, endoscopic sinus surgery may be recommended to remove blockages and improve sinus drainage.   It's important for individuals with chronic rhinosinusitis to work closely with their healthcare provider to develop a personalized treatment plan tailored to their specific needs and underlying causes of their condition. | Consistent | 1 | 2 | 2 |
| 1. Describe the surgical treatment of chronic rhinosinusitis | The surgical treatment of chronic rhinosinusitis (CRS) aims to alleviate symptoms and improve sinus drainage by removing diseased tissue, opening blocked passages, and promoting proper ventilation of the sinuses. Surgical intervention is typically considered when medical therapies such as antibiotics, corticosteroids, and nasal irrigation fail to provide adequate relief.  Here's an overview of the surgical procedures commonly used in the treatment of chronic rhinosinusitis:   1. **Functional Endoscopic Sinus Surgery (FESS)**:    - FESS is the most common surgical procedure for CRS. It is minimally invasive and is performed using an endoscope, a thin tube with a camera and light at its tip.    - During FESS, the surgeon uses specialized instruments to remove obstructive tissue, enlarge sinus openings, and clear blocked passages.    - The procedure is performed entirely through the nostrils, avoiding external incisions and minimizing postoperative discomfort.    - FESS aims to restore normal sinus drainage and ventilation, allowing for improved airflow and reduction of inflammation. 2. **Septoplasty**:    - Septoplasty may be performed in conjunction with FESS, especially if a deviated nasal septum contributes to sinus obstruction.    - This procedure involves straightening the nasal septum, the partition between the nostrils, to improve airflow and nasal function. 3. **Turbinoplasty/Turbinectomy**:    - Enlarged turbinates (structures inside the nose that help regulate airflow and humidity) can contribute to nasal obstruction and CRS symptoms.    - Turbinoplasty involves reducing the size of the turbinates to improve nasal airflow and reduce congestion.    - In severe cases, partial or complete removal of turbinates (turbinectomy) may be necessary. 4. **Balloon Sinuplasty**:    - Balloon sinuplasty is a minimally invasive procedure that can be performed under local anesthesia.    - A small, flexible balloon catheter is inserted into the blocked sinus opening and then inflated, gently expanding the opening and restoring proper drainage.    - This technique is less invasive than traditional surgery and may be suitable for certain cases of CRS. 5. **Image-Guided Surgery**:    - In cases where sinus anatomy is complex or distorted due to previous surgeries or other factors, image-guided surgery may be used.    - This technique utilizes real-time imaging, such as CT scans, to provide the surgeon with detailed guidance during the procedure, ensuring precise navigation and targeting of affected areas. 6. **Polypectomy**:    - In CRS with nasal polyps, surgical removal of the polyps (polypectomy) may be necessary to improve symptoms and restore nasal function.    - This procedure may be performed as part of FESS or as a standalone surgery.   Surgical treatment for chronic rhinosinusitis is typically tailored to the individual patient's anatomy, symptoms, and underlying causes. It's important for patients to discuss the risks, benefits, and expected outcomes of surgery with their healthcare provider to make informed decisions about their treatment. Additionally, postoperative care, including nasal hygiene and follow-up appointments, is crucial for optimizing outcomes and preventing complications. | Consistent | 1 | 1 | 1 |
| 1. What are the complications of chronic rhinosinusitis? | Chronic rhinosinusitis (CRS) can lead to several complications if left untreated or inadequately managed. Some of the potential complications include:   1. **Acute exacerbations**: CRS can lead to frequent acute exacerbations, which are episodes of worsening symptoms such as increased nasal congestion, facial pain or pressure, and thick nasal discharge. 2. **Nasal polyps**: Chronic inflammation in the nasal passages and sinuses can cause the development of nasal polyps, which are noncancerous growths that can obstruct the nasal passages and lead to further symptoms such as nasal congestion, difficulty breathing, and reduced sense of smell or taste. 3. **Chronic or recurrent sinus infections**: CRS can predispose individuals to recurrent or persistent bacterial sinus infections, leading to further inflammation and discomfort. These infections may require antibiotics for treatment. 4. **Osteitis**: Prolonged inflammation in the sinuses can lead to osteitis, which is inflammation of the bone surrounding the sinuses. This can cause pain and erosion of the bone. 5. **Orbital complications**: In severe cases, chronic inflammation in the sinuses can lead to complications involving the eye and surrounding structures, such as orbital cellulitis (infection of the tissues surrounding the eye), orbital abscess (collection of pus in the eye socket), or even orbital involvement by extension of infection or inflammation from the sinuses. 6. **Central nervous system complications**: Although rare, untreated CRS can lead to intracranial complications such as meningitis, brain abscess, or other serious infections affecting the brain and its coverings. These complications typically occur when the infection spreads from the sinuses to the nearby structures in the skull. 7. **Decreased quality of life**: Chronic rhinosinusitis can significantly impair quality of life due to persistent symptoms such as nasal congestion, facial pain or pressure, reduced sense of smell or taste, fatigue, and sleep disturbances.   It's important for individuals with CRS to seek appropriate medical evaluation and treatment to prevent or manage these complications effectively. Treatment may include medications such as antibiotics, nasal corticosteroids, antihistamines, saline nasal irrigation, and in some cases, surgery to improve sinus drainage and alleviate symptoms. | Chronic rhinosinusitis (CRS) is a persistent inflammation of the sinuses lasting 12 weeks or longer despite medical treatment. If not properly managed, CRS can lead to several complications, including both local and systemic effects. Here’s a breakdown of potential complications:  ### 1. **Local Complications:**  - **Orbital Complications (Eye-related):**  - **Orbital cellulitis:** Infection spreads to the tissues around the eye, causing pain, swelling, and redness.  - **Subperiosteal abscess:** Pus collection between the eye's periosteum and the bone, which can impair vision.  - **Orbital abscess:** Infection within the eye socket, possibly leading to blindness if untreated.  - **Cavernous sinus thrombosis:** A rare but life-threatening condition where infection spreads to the cavernous sinus (a vein at the brain's base), causing severe headaches, eye bulging, and nerve damage.  - **Intracranial Complications:**  - **Meningitis:** Infection spreads to the meninges, causing fever, stiff neck, and neurological issues.  - **Brain abscess:** Pus accumulation in the brain can lead to seizures, headaches, or altered consciousness.  - **Epidural or subdural abscess:** Infection occurs between the skull and the brain’s protective layers, potentially causing pressure and neurological symptoms.    - **Osteomyelitis (Pott’s Puffy Tumor):**  - Infection spreads to the bones, leading to swelling and tenderness over the affected bone, particularly in the forehead area.  ### 2. **Chronic Complications:**  - **Polyps or Mucoceles:**  - Persistent inflammation can result in polyp formation or mucus-filled cysts that block the sinuses and worsen symptoms.  - **Chronic headache and facial pain:**  - Recurrent sinus infections can cause ongoing pain, often resembling migraines or cluster headaches.  - **Loss of Smell (Anosmia) and Taste Dysfunction:**  - Ongoing sinus inflammation may impair the olfactory nerves, leading to permanent or prolonged loss of smell.  - **Sleep disturbances and fatigue:**  - Blocked sinuses can disrupt sleep and cause fatigue, contributing to reduced quality of life.  - **Asthma exacerbation:**  - CRS is often associated with asthma, and untreated sinus inflammation can trigger or worsen asthma symptoms (referred to as the “unified airway” concept).  ### 3. **Systemic Complications:**  - **Lower Respiratory Tract Infections:**  - Bacteria or fungi can migrate to the lungs, leading to bronchitis or pneumonia.  - **Chronic inflammation:**  - Persistent sinusitis can increase systemic inflammation, potentially worsening comorbidities like cardiovascular disease.  - **Impact on quality of life:**  - CRS can lead to depression, anxiety, and reduced productivity due to constant discomfort and sleep disruption.  ### 4. **Complications Related to Fungal Infections:**  - **Allergic fungal sinusitis:** Can cause severe nasal obstruction, requiring surgical intervention.  - **Invasive fungal sinusitis:** A rare but severe complication in immunocompromised individuals, leading to tissue necrosis and potential spread to the brain.  ### **Conclusion:**  Managing CRS with medications, lifestyle changes, and sometimes surgical intervention (like functional endoscopic sinus surgery) is crucial to avoid these complications. Early diagnosis and treatment, especially for bacterial or fungal infections, can significantly reduce the risk of severe outcomes. | 1 | 2 | 2---1 |
| 1. What are the endoscopic findings of chronic rhinosinusitis? | Chronic rhinosinusitis (CRS) is a condition characterized by inflammation of the mucous membranes of the nose and paranasal sinuses lasting for at least 12 weeks. Endoscopic examination of the nasal cavity and sinuses is a crucial diagnostic tool for evaluating CRS. Some common endoscopic findings of chronic rhinosinusitis include:   1. **Nasal Polyps**: These are noncancerous growths on the lining of the nasal passages or sinuses. They are often pale, gelatinous, and can vary in size from small to large. Nasal polyps can obstruct the nasal passages and contribute to symptoms such as nasal congestion and impaired sense of smell. 2. **Mucosal Edema**: Swelling or inflammation of the mucous membranes lining the nasal passages and sinuses is commonly observed in CRS. This edema can lead to nasal congestion and obstruction. 3. **Mucopurulent Secretions**: Excessive mucus production along with pus formation may be observed in the nasal cavity and sinuses. This can contribute to symptoms such as nasal discharge and postnasal drip. 4. **Scarring**: In severe cases of CRS or longstanding inflammation, scarring of the nasal mucosa and sinus tissues may occur. Scars can lead to structural changes within the nasal passages and sinuses, further contributing to symptoms and potentially complicating treatment. 5. **Erosions or Ulcerations**: Chronic inflammation can cause damage to the nasal mucosa and sinuses, leading to erosions or ulcerations. These findings may indicate more severe or refractory disease. 6. **Concha Bullosa**: This is a pneumatized middle turbinate, a common anatomical variation where air-filled spaces develop within the turbinate. While not necessarily indicative of CRS on its own, its presence may contribute to symptoms or complicate treatment. 7. **Middle Meatal Antrostomy (MMA)**: In cases where surgery has been performed for CRS, particularly endoscopic sinus surgery, the presence of surgical interventions like MMA may be visible during endoscopic examination. 8. **Pansinusitis**: In severe cases of CRS, inflammation may involve all paranasal sinuses, leading to pansinusitis. Endoscopic examination may reveal diffuse inflammation across multiple sinuses.   These findings, along with patient history, symptoms, and additional diagnostic tests such as imaging studies, help clinicians in diagnosing and managing chronic rhinosinusitis effectively. | Consistent | 1 | 2 | 2 |
| 1. How is the chronic rhinosinusitis classified? What are the terms that endotype and phenotype and why are they emerged for? | Chronic rhinosinusitis (CRS) can be classified based on various factors, including its clinical presentation, underlying pathophysiology, and response to treatment. Two terms commonly used in classifying CRS are "endotype" and "phenotype."   1. **Endotype**: An endotype refers to the distinct pathophysiologic mechanism underlying a disease. In the case of CRS, endotypes may include eosinophilic CRS, non-eosinophilic CRS, neutrophilic CRS, or combinations thereof. These endotypes are characterized by specific inflammatory pathways, cytokine profiles, and cellular infiltrates within the sinus tissue. 2. **Phenotype**: A phenotype refers to the observable clinical characteristics of a disease, which can include symptoms, disease severity, imaging findings, and response to treatment. Phenotypes of CRS may include nasal polyps, allergic fungal sinusitis, aspirin-exacerbated respiratory disease (AERD), or CRS without nasal polyps, among others. These phenotypes help clinicians categorize patients based on their clinical presentation and guide treatment decisions.   The emergence of endotypes and phenotypes in CRS is essential for several reasons:   - **Personalized Medicine**: By identifying specific endotypes and phenotypes, clinicians can tailor treatment approaches to target the underlying pathophysiology of the disease in individual patients. This personalized approach may lead to more effective and targeted therapies. - **Improved Understanding**: Understanding the different endotypes and phenotypes of CRS provides insights into the underlying mechanisms driving the disease, leading to advancements in diagnostic tools and treatment options. - **Research and Clinical Trials**: Endotyping and phenotyping allow researchers to stratify patients in clinical trials based on their disease characteristics. This stratification can help identify subgroups of patients who may benefit most from certain treatments and facilitate the development of new therapies.   Overall, the classification of CRS into endotypes and phenotypes represents a shift towards precision medicine, aiming to improve diagnostic accuracy, treatment efficacy, and patient outcomes in this complex and heterogeneous disease. | Consistent | 1 | 1 | 1 |
| 1. In patients with chronic rhinsinusitis, what comorbidities should be investigated that might modify management? | Chronic rhinosinusitis (CRS) is a condition characterized by inflammation of the nasal and sinus passages lasting for 12 weeks or longer. Several comorbidities may impact the management of CRS due to their potential to exacerbate symptoms or complicate treatment. Here are some comorbidities commonly associated with CRS that should be investigated to modify management:   1. **Asthma**: CRS and asthma frequently coexist, and each condition can exacerbate the other. Managing asthma effectively may help control CRS symptoms. 2. **Nasal Polyps**: Patients with CRS may develop nasal polyps, which can obstruct the nasal passages and exacerbate symptoms. Polyp management may require additional interventions such as surgery or steroid treatments. 3. **Allergic Rhinitis**: Allergic rhinitis can exacerbate CRS symptoms and may require specific allergy management strategies such as allergen avoidance, antihistamines, or immunotherapy. 4. **Aspirin Sensitivity (Samter's Triad)**: Some patients with CRS have aspirin sensitivity, characterized by respiratory reactions to aspirin and other nonsteroidal anti-inflammatory drugs (NSAIDs). Identifying and managing this sensitivity is crucial to avoid exacerbating symptoms. 5. **Immunodeficiency Disorders**: Patients with immunodeficiency disorders may be more susceptible to recurrent or severe sinus infections. Identifying and addressing underlying immune system issues may be necessary for effective management. 6. **Gastroesophageal Reflux Disease (GERD)**: GERD has been associated with CRS, and controlling reflux symptoms may help alleviate sinusitis symptoms in affected individuals. 7. **Cystic Fibrosis**: CRS is common in individuals with cystic fibrosis due to thickened mucus obstructing the sinus passages. Management may need to be tailored to address both conditions. 8. **Systemic Conditions**: Conditions such as diabetes, autoimmune diseases, and HIV/AIDS can impact the immune system and increase the risk or severity of CRS. Managing these conditions may improve CRS outcomes. 9. **Chronic Lung Diseases**: Conditions like chronic obstructive pulmonary disease (COPD) or bronchiectasis can exacerbate sinusitis symptoms and complicate management due to impaired mucociliary clearance and increased susceptibility to infections. 10. **Obstructive Sleep Apnea (OSA)**: OSA and CRS commonly coexist. Addressing OSA through interventions like continuous positive airway pressure (CPAP) therapy may improve CRS symptoms.   Assessing and managing these comorbidities in patients with CRS is essential for optimizing treatment outcomes and improving quality of life. A multidisciplinary approach involving otolaryngologists, allergists, pulmonologists, and other specialists may be necessary to address the complex needs of these patients. | Consistent | 1 | 1 | 1 |
| 1. In what situations CT is indicated in patients with chronic sinusitis? What are the main the main points of concern during evaluation of CT of those patients? | CT (Computed Tomography) is indicated in patients with chronic sinusitis in several situations:   1. **Failure of Conservative Treatment**: When patients fail to respond to initial conservative treatment, which may include antibiotics, nasal steroids, and saline irrigation, CT can be warranted to assess the extent and severity of sinus disease. 2. **Suspected Complications**: In cases where there is a suspicion of complications arising from chronic sinusitis such as orbital or intracranial involvement, CT can provide valuable information to guide management. 3. **Assessment of Anatomical Variations**: CT is useful in identifying anatomical variations that may predispose individuals to chronic sinusitis or complicate its management. These include deviated nasal septum, nasal polyps, concha bullosa, and others. 4. **Preoperative Evaluation**: Prior to surgical intervention for chronic sinusitis, CT imaging is often performed to precisely delineate the anatomy and pathology, aiding the surgeon in planning the procedure. 5. **Monitoring Disease Progression**: CT scans can be used to monitor disease progression or response to treatment over time, especially in patients with severe or refractory chronic sinusitis.   During the evaluation of CT scans in patients with chronic sinusitis, several main points of concern should be considered:   1. **Extent and Severity of Disease**: Assessing the extent and severity of sinus disease is crucial for guiding treatment decisions. This includes evaluating the involvement of various sinuses (maxillary, ethmoid, frontal, and sphenoid) and the presence of mucosal thickening, polyps, or bony abnormalities. 2. **Anatomical Variations**: Identifying anatomical variations such as septal deviation, concha bullosa, Haller cells, and pneumatized uncinate process is important as they may contribute to sinus obstruction or predispose individuals to sinusitis. 3. **Complications**: Careful evaluation for complications such as orbital or intracranial involvement is essential, particularly in cases of severe or refractory sinusitis, or when there is clinical suspicion of complications. 4. **Presence of Nasal Polyps**: Nasal polyps are common in chronic sinusitis and can be visualized on CT scans. Their presence and extent may influence treatment decisions, particularly regarding the use of medical versus surgical management. 5. **Osteomeatal Complex (OMC) Obstruction**: Evaluation of the osteomeatal complex is important as obstruction in this area is often associated with chronic sinusitis. Identifying OMC obstruction can guide surgical planning, such as performing functional endoscopic sinus surgery (FESS) to improve sinus drainage. 6. **Sinonasal Anatomy**: A detailed assessment of sinonasal anatomy, including the presence of accessory sinuses, variations in sinus pneumatization, and the patency of ostiomeatal complexes, is essential for understanding the underlying pathology and planning appropriate management.   In summary, CT imaging plays a crucial role in the evaluation of patients with chronic sinusitis by providing detailed anatomical information, assessing the extent and severity of disease, identifying complications, and guiding treatment decisions. | Consistent | 1 | 1 | 1 |
|  |  |  |  |  |  |
| Deviated septum/ turbinate hypertrophy |  |  |  |  |  |
| 1. What are the structural structures of the nasal septum? | The nasal septum is a partition that divides the nasal cavity into two sides, left and right. It consists mainly of cartilage and bone, with a lining of mucous membrane. The structural components of the nasal septum include:   1. **Perpendicular Plate of the Ethmoid Bone**: This is a thin, flattened bone that arises from the upper part of the nasal septum. It extends downwards from the cribriform plate of the ethmoid bone, forming the superior part of the nasal septum. 2. **Vomer Bone**: The vomer bone is a thin, flat bone that lies in the midline of the nasal cavity. It forms the posterior-inferior part of the nasal septum. 3. **Septal Cartilage**: This is a flexible cartilage structure that forms the anterior-inferior part of the nasal septum. It is continuous with the perpendicular plate of the ethmoid bone superiorly and with the vomer bone posteriorly.   These structures collectively form the framework of the nasal septum, providing support and stability to the nasal cavity. However, it's important to note that the exact proportions and contributions of each structure can vary among individuals. Additionally, the nasal septum may also have deviations or irregularities, which can lead to conditions such as a deviated septum. | Consistent | 1 | 1 | 1 |
| 1. What are the types of septum deviation? | Septal deviation refers to the displacement or crookedness of the nasal septum, which is the cartilage and bone that divides the nasal cavity into two nostrils. There are various types of septal deviations, which can occur alone or in combination. Some common types include:   1. **C-shaped deviation**: In this type, the septum is curved in the shape of the letter "C". It can obstruct one or both nostrils depending on the severity and direction of the deviation. 2. **S-shaped deviation**: This type of deviation involves a double curve, resembling the letter "S". It may cause significant nasal obstruction and can be more challenging to correct surgically. 3. **Spur deviation**: A spur is an outgrowth or projection of bone or cartilage along the septum. This type of deviation can cause blockage and discomfort, particularly during breathing. 4. **Anterior deviation**: Anterior deviation occurs towards the front of the nasal septum and can lead to visible asymmetry of the nostrils. It may also contribute to nasal obstruction. 5. **Posterior deviation**: Posterior deviation involves displacement towards the back of the nasal septum. It may be less visible externally but can still cause significant nasal obstruction. 6. **Lateral deviation**: In lateral deviation, the septum is shifted towards one side of the nasal cavity, causing asymmetry and obstruction in one nostril. 7. **Mixed deviation**: Some individuals may have a combination of different types of septal deviations, making treatment more complex.   Septal deviations can vary in severity, and they may or may not cause symptoms. When a septal deviation leads to nasal obstruction, recurrent sinus infections, or other related issues, surgical correction may be considered to improve breathing and overall nasal function. | Consistent | 1 | 1 | 1 |
| 1. Describe septoplasty surgery. | Septoplasty is a surgical procedure performed to correct a deviated nasal septum. The nasal septum is the thin wall of cartilage and bone that divides the nasal cavity into two nostrils. When this septum is significantly deviated or crooked, it can cause various symptoms such as nasal congestion, difficulty breathing, snoring, recurrent sinus infections, and nosebleeds.  Here's an overview of the septoplasty surgery process:   1. **Preparation**: Before the surgery, the patient will typically undergo a comprehensive evaluation by an ear, nose, and throat (ENT) specialist to assess the extent of the deviation and to determine if septoplasty is the appropriate treatment. This may involve a physical examination, nasal endoscopy, and possibly imaging studies such as a CT scan. 2. **Anesthesia**: Septoplasty is commonly performed under local anesthesia with sedation or general anesthesia, depending on the preference of the surgeon and the patient's health status. 3. **Incision**: The surgeon makes an incision inside the nose, usually on one side of the septum, to access the deviated portion. In some cases, a small incision may be made on the outer skin of the nose (open septoplasty) if additional access is required. 4. **Reshaping the septum**: The deviated portions of the septum are carefully reshaped, repositioned, or removed to straighten the septum and improve nasal airflow. This may involve techniques such as cutting, repositioning, or removing excess cartilage or bone. 5. **Closing the incision**: Once the necessary adjustments have been made, the incisions inside the nose are closed with dissolvable stitches or left to heal naturally. 6. **Postoperative care**: After the surgery, the patient is typically monitored in a recovery area until they are awake and stable. Pain medication and antibiotics may be prescribed to manage discomfort and reduce the risk of infection. Nasal packing or splints may be placed inside the nose temporarily to support the septum as it heals. 7. **Recovery**: The recovery time for septoplasty varies from person to person but usually involves some degree of nasal congestion, swelling, and mild discomfort for a few days to a couple of weeks. Most patients can resume normal activities within a week or two, although strenuous exercise and activities that could risk injuring the nose should be avoided for a few weeks. 8. **Follow-up**: Follow-up appointments with the surgeon are typically scheduled to monitor healing progress and address any concerns or complications that may arise.   Septoplasty is generally considered a safe and effective procedure for improving nasal breathing and alleviating associated symptoms caused by a deviated septum. However, as with any surgical procedure, there are potential risks and complications, including bleeding, infection, changes in nasal shape or sensation, and recurrence of symptoms. It's essential for patients to discuss these risks with their surgeon and follow all preoperative and postoperative instructions carefully. | Consistent | 1 | 2 | 1 |
| 1. What are the indications for septoplasty? | Septoplasty is a surgical procedure aimed at correcting a deviated septum, which is the displacement of the thin wall (septum) between your nostrils. Here are some indications for septoplasty:   1. **Nasal obstruction:** A deviated septum can cause one or both nostrils to be blocked or obstructed, leading to difficulty breathing through the nose. 2. **Chronic nasal congestion:** Difficulty breathing through the nose due to a deviated septum can lead to chronic nasal congestion, which can affect sleep quality and overall comfort. 3. **Recurrent sinus infections:** A deviated septum can interfere with normal sinus drainage, increasing the likelihood of recurrent sinus infections. 4. **Nasal deformity:** In some cases, a deviated septum may result in noticeable nasal deformity, such as a crooked or asymmetrical appearance of the nose. 5. **Snoring and sleep apnea:** A deviated septum can contribute to snoring and obstructive sleep apnea by narrowing the nasal airway and causing airflow obstruction during sleep. 6. **Difficulty with nasal breathing during exercise:** Individuals with a deviated septum may experience increased difficulty breathing through the nose during physical exertion, which can affect performance and comfort during exercise.   It's essential to consult with an ENT (ear, nose, and throat) specialist or a qualified healthcare provider to determine whether septoplasty is the appropriate treatment option based on your specific symptoms and medical history. They will evaluate your condition and recommend the most suitable course of action, which may include septoplasty or alternative treatments. | Septoplasty is a surgical procedure performed to correct a deviated nasal septum. Below are the primary **indications for septoplasty**:  ### 1. **Nasal Obstruction**  - Persistent difficulty breathing through one or both nostrils due to a deviated septum.  - Worsening of obstruction when lying on one side.  ### 2. **Chronic Nasal or Sinus Problems**  - Recurrent or chronic sinusitis due to impaired drainage from a deviated septum.  - Postnasal drip or sinus infections that do not respond to medical treatment.  ### 3. **Epistaxis (Nosebleeds)**  - Repeated nosebleeds caused by septal deformities and dryness of mucosa along the septum.  ### 4. **Snoring or Sleep Apnea**  - Snoring or obstructive sleep apnea worsened by nasal obstruction from a deviated septum.  ### 5. **Headaches or Facial Pain**  - Septal deviation causing contact between the septum and turbinates, leading to headache or facial pain (known as contact point headache).  ### 6. **Nasal Trauma or Fracture**  - Septal deviation due to trauma that causes cosmetic or functional issues.  ### 7. **Nasal Septal Deformity Affecting Functionality**  - Athletes or individuals whose performance is impaired by nasal obstruction during physical activity.  ### 8. **Preparation for Other Nasal or Sinus Surgeries**  - Septoplasty performed along with other procedures like sinus surgery or rhinoplasty to improve access or outcomes.  ### 9. **Septal Perforation**  - Correction of deformities to facilitate repair of a septal perforation.  ### 10. **Cosmetic Considerations** (in Combination with Rhinoplasty)  - If the septal deviation contributes to visible nasal deformity, septoplasty may be combined with rhinoplasty.  These indications are usually confirmed through physical examination and imaging (such as nasal endoscopy or CT scans) to assess the degree of deviation and its effect on nasal function. | 2 | 1 | 2---1 |
| 1. What are the surgical procedures that can be performed in inferior turbinate hypertrophy? | Inferior turbinate hypertrophy refers to the enlargement of the inferior turbinate bones in the nasal cavity, which can lead to nasal obstruction and difficulty breathing through the nose. When conservative measures like medications and nasal sprays fail to alleviate symptoms, surgical intervention may be considered. Here are some surgical procedures commonly performed for inferior turbinate hypertrophy:   1. **Inferior Turbinate Reduction (Turbinoplasty)**: This is a surgical procedure aimed at reducing the size of the inferior turbinates. There are different techniques used for turbinate reduction, including:    - Submucosal resection: Removing a portion of the bone and soft tissue inside the turbinate while preserving the mucosal lining.    - Radiofrequency ablation (RFA): Using radiofrequency energy to shrink the soft tissue within the turbinate, leading to reduction in size.    - Laser-assisted turbinoplasty: Utilizing lasers to vaporize or ablate excess tissue in the turbinate. 2. **Partial Turbinectomy**: In this procedure, a portion of the inferior turbinate is surgically removed. It aims to reduce the bulk of the turbinate while preserving its function and mucosal lining. 3. **Total Turbinectomy**: This involves complete removal of the inferior turbinate. It is usually considered a last resort due to the risk of complications such as empty nose syndrome, which can cause persistent nasal dryness and discomfort. 4. **Microdebrider-assisted Turbinoplasty**: This technique utilizes a powered instrument called a microdebrider to precisely remove excess tissue from the turbinate while minimizing trauma to surrounding structures. 5. **Cauterization**: Cauterization involves using heat or chemical agents to shrink the tissue within the turbinate, reducing its size. 6. **Balloon Sinuplasty with Turbinate Reduction**: This is a minimally invasive procedure that combines balloon dilation of the sinus passages with reduction of the inferior turbinate size. 7. **Septoplasty with Turbinate Reduction**: When inferior turbinate hypertrophy coexists with a deviated nasal septum, septoplasty (correction of the deviated septum) may be performed along with turbinate reduction to address both issues simultaneously.   The choice of surgical procedure depends on various factors including the severity of symptoms, the patient's anatomy, and the surgeon's preference and expertise. It's important for patients to discuss the risks, benefits, and expected outcomes of each procedure with their ENT (ear, nose, and throat) specialist before making a decision. | Consistent | 1 | 2 | 2 |
| 1. What are the complications of septoplasty? | Septoplasty is a surgical procedure performed to correct a deviated septum, which is the displacement of the nasal septum, the partition between the two nasal cavities. While septoplasty is generally considered safe, like any surgical procedure, it carries potential risks and complications. Some of these complications may include:   1. **Bleeding**: Bleeding is common during and after surgery. In most cases, it's minor and easily controlled. However, excessive bleeding can occur in rare cases, requiring further treatment or even a blood transfusion. 2. **Infection**: Any surgical procedure carries a risk of infection. This risk is usually mitigated by administering antibiotics before and after surgery and maintaining proper sterile conditions during the procedure. Signs of infection include increased pain, redness, swelling, or discharge from the surgical site. 3. **Persistent nasal obstruction**: In some cases, despite the surgery, patients may continue to experience nasal obstruction. This could be due to various factors such as incomplete correction of the septal deviation or the development of scar tissue. 4. **Septal perforation**: This refers to a hole in the septum, which can occur due to trauma during surgery or as a result of poor healing. Septal perforations can cause nasal crusting, bleeding, whistling sounds during breathing, and an increased risk of nasal infections. 5. **Changes in nasal shape or symmetry**: Septoplasty involves manipulating the nasal structures, which can occasionally lead to changes in the external appearance of the nose. While the primary goal of septoplasty is to improve nasal function rather than aesthetics, some patients may be concerned about changes in the appearance of their nose. 6. **Loss of smell or taste**: Although rare, some patients may experience temporary or permanent changes in their sense of smell or taste following septoplasty. This could be due to damage to the olfactory nerves or other factors related to the surgery. 7. **Adverse reaction to anesthesia**: Septoplasty is typically performed under general anesthesia, which carries inherent risks such as allergic reactions, breathing difficulties, or cardiovascular complications. 8. **Persistent pain or discomfort**: While discomfort is common immediately following septoplasty, persistent or severe pain could indicate complications such as infection or inadequate healing.   It's essential for patients to discuss these potential risks and complications with their surgeon before undergoing septoplasty, as well as to follow post-operative instructions carefully to minimize the likelihood of complications and ensure optimal recovery. | Consistent | 1 | 1 | 1 |
| 1. What is septum perforation? What diseases are in its etiology? | Septum perforation refers to a hole or opening in the nasal septum, which is the cartilage and bone that separates the two nostrils. This condition can lead to various symptoms such as nasal congestion, crusting, nosebleeds, whistling sounds during breathing, and a decreased sense of smell.  Septum perforation can have several causes, including:  1. **Trauma**: Direct trauma to the nose, such as from a sports injury, car accident, or physical altercation, can cause septum perforation.  2. **Nasal Surgery**: Certain nasal surgeries, particularly those involving septoplasty (surgery to correct a deviated septum) or nasal polypectomy (removal of nasal polyps), can lead to septum perforation as a complication.  3. **Nasal Drug Use**: Chronic use of intranasal drugs such as cocaine or methamphetamine can cause damage to the nasal septum, leading to perforation.  4. **Autoimmune Diseases**: Conditions such as granulomatosis with polyangiitis (formerly known as Wegener's granulomatosis) and systemic lupus erythematosus (SLE) can cause inflammation and damage to the nasal septum, resulting in perforation.  5. **Nasal Infections**: Chronic or severe infections of the nasal passages, such as chronic sinusitis or fungal infections, can lead to tissue damage and septum perforation.  6. **Nasal Irritation**: Prolonged exposure to irritants such as industrial chemicals, pollutants, or chronic nasal packing can also contribute to the development of septum perforation.  7. **Congenital Conditions**: Rarely, septum perforation can be present from birth due to congenital abnormalities or genetic conditions affecting the development of the nasal septum.  Treatment for septum perforation depends on the size of the perforation, the severity of symptoms, and the underlying cause. Options may include conservative measures such as nasal saline sprays, lubricating ointments, or nasal septal buttons to alleviate symptoms. In some cases, surgical repair may be necessary, particularly if the perforation is large or causing significant symptoms. | Consistent | 1 | 1 | 1 |
| 1. What are the surgeries that can be performed for septum perforation? | Septal perforation, also known as a hole in the nasal septum, can result from various causes such as trauma, chronic nasal infections, nasal drug abuse, or certain medical conditions. Surgical intervention may be necessary depending on the size of the perforation, its symptoms, and the patient's overall health. Here are some of the surgical options available for septal perforation:  1. **Septal Perforation Repair:** This is the primary surgical option for septal perforation. The procedure involves closing the hole in the septum using tissue grafts taken from elsewhere in the body, typically from the nasal septum itself, the nasal turbinates, or the nasal mucosa. The graft is carefully placed to cover the perforation and promote healing.  2. **Endoscopic Septoplasty:** Endoscopic septoplasty involves using an endoscope, a thin tube with a camera attached, to visualize the nasal cavity and perform surgical procedures. This minimally invasive approach allows for precise surgical correction of the septal perforation while minimizing trauma to surrounding tissues.  3. **Flap Reconstruction:** In cases where the perforation is large or complex, flap reconstruction techniques may be employed. This involves creating a flap of tissue from nearby nasal mucosa or other tissue sources to cover the perforation and promote healing. Flap reconstruction may be performed in conjunction with other surgical techniques.  4. **Balloon Sinuplasty:** While primarily used to treat sinus conditions, balloon sinuplasty may also be utilized in certain cases of septal perforation repair. This minimally invasive procedure involves inserting a small balloon catheter into the nasal passages and inflating it to widen obstructed sinus openings and promote drainage. In some cases, it may help in repairing small septal perforations.  5. **Turbinoplasty:** Turbinoplasty is a surgical procedure aimed at reducing the size of the nasal turbinates, which are structures that help humidify and filter air as it passes through the nasal passages. By reducing the size of the turbinates, airflow can be improved, which may alleviate symptoms associated with septal perforation.  6. **Septal Button:** In cases where surgical repair is not feasible or desired, a septal button may be used as a temporary or permanent solution. A septal button is a silicone prosthesis designed to occlude the perforation and improve symptoms such as nasal obstruction and crusting.  It's essential to consult with an experienced otolaryngologist (ear, nose, and throat specialist) to determine the most appropriate surgical approach based on the individual's specific circumstances and the characteristics of the septal perforation. Additionally, non-surgical interventions such as nasal saline rinses, topical medications, and lifestyle modifications may be recommended to manage symptoms and promote healing, particularly in mild cases. | Surgery for **septal perforation** (a hole in the nasal septum) aims to restore normal nasal function and improve breathing, airflow, or cosmetic concerns. Various techniques are available, depending on the size and location of the perforation, tissue health, and patient factors. Here are the most common surgical approaches:  ### 1. **Primary Closure (Direct Suturing)**  - **Indication**: Small perforations (less than 1-2 cm).  - **Procedure**: The edges of the perforation are brought together and stitched directly.  - **Limitations**: It’s only feasible for smaller defects with good tissue elasticity.  ---  ### 2. **Local Flap Reconstruction**  - **Indication**: Moderate-sized perforations.  - **Procedure**: Mucosal tissue from nearby areas (e.g., inferior turbinate) is rotated to cover the hole.  - **Examples of Flaps**:  - Advancement flaps  - Rotational flaps  - Hinge flaps  - **Advantage**: Uses the patient's native tissue, with a lower rejection risk.  - **Limitation**: Not suitable for large perforations.  ---  ### 3. **Interpositional Graft Repair**  - **Indication**: Medium to large perforations (over 2 cm).  - **Procedure**: Grafts (cartilage, fascia, acellular dermal matrix, or allograft) are placed between the perforation edges to bridge the gap.  - **Common Graft Sources**:  - Cartilage from the ear or rib  - Fascia from the temporal region (temporalis fascia)  - **Benefit**: Provides structural support and promotes tissue healing.  ---  ### 4. **Free Graft Technique**  - **Indication**: Large perforations with insufficient adjacent tissue for local flaps.  - **Procedure**: A piece of tissue (e.g., buccal mucosa, acellular dermis) is grafted into the defect without relying on local mucosa for blood supply.  - **Limitation**: Higher risk of graft failure due to reduced blood supply.  ---  ### 5. **Combination Repair (Graft + Flap)**  - **Indication**: Large and complex perforations.  - **Procedure**: A graft is placed between the perforation edges and is supported by local or regional flaps to improve blood supply and healing.  - **Benefit**: Increases success rate for difficult cases.  ---  ### 6. **Endoscopic Approach**  - **Indication**: Moderate-sized perforations.  - **Procedure**: Minimally invasive surgery using an endoscope, which helps visualize and repair the septum through the nostrils.  - **Benefit**: Less scarring and quicker recovery.  ---  ### 7. **Silicone Button or Prosthesis**  - **Indication**: When surgery is not feasible or in high-risk patients.  - **Procedure**: A silicone prosthesis (septal button) is inserted to cover the perforation.  - **Advantage**: Provides symptomatic relief without surgery.  - **Limitation**: Requires maintenance and periodic replacement.  ---  ### 8. **External Rhinoplasty Approach**  - **Indication**: Large perforations or cases with significant nasal deformities.  - **Procedure**: An open surgical technique where the nasal structure is accessed externally, often combining functional and cosmetic repair.  - **Benefit**: Allows extensive reconstruction of the septum and nasal framework.  ---  ### Conclusion  The choice of surgery depends on the **size of the perforation**, the patient’s health, tissue availability, and the surgeon’s expertise. In cases where surgery is too risky or the defect is small and asymptomatic, **non-surgical options**, such as septal buttons, can be a good alternative. | 2 | 3 | 3---2 |
| 1. What are the non-surgical treatments for septum perforation? | Septum perforation, a hole in the nasal septum, can result from various factors such as trauma, chronic nasal irritation, drug abuse, or certain medical conditions. Non-surgical treatments for septum perforation primarily focus on managing symptoms and preventing further damage. Here are some common non-surgical treatment options:  1. **Topical Nasal Sprays:** Nasal sprays such as saline sprays or nasal moisturizers can help keep the nasal passages moist and prevent irritation. These can reduce discomfort associated with septal perforation.  2. **Nasal Irrigation:** Using a saline solution to rinse the nasal passages can help remove irritants and keep the nasal passages moist. Nasal irrigation can be done using a neti pot, squeeze bottle, or nasal irrigation device.  3. **Avoiding Irritants:** Avoiding environmental irritants such as cigarette smoke, pollution, and strong chemicals can help prevent further irritation to the nasal passages and reduce symptoms associated with septal perforation.  4. **Nasal Septal Button:** A nasal septal button is a silicone device that can be inserted into the septal perforation to temporarily block the hole and improve symptoms such as nasal obstruction and crusting. These devices are removable and can be cleaned regularly.  5. **Moisturizing Ointments:** Applying moisturizing ointments or gels inside the nostrils can help keep the nasal passages moist and prevent crusting and discomfort associated with septal perforation.  6. **Antibiotics:** If there is an infection associated with the septal perforation, antibiotics may be prescribed to treat the infection and prevent further complications.  7. **Avoiding Nasal Trauma:** Minimizing trauma to the nasal septum, such as avoiding picking the nose or inserting foreign objects into the nostrils, can help prevent worsening of the perforation.  8. **Regular Follow-Up:** Regular follow-up with an otolaryngologist (ear, nose, and throat specialist) is important for monitoring the condition of the septal perforation and managing symptoms effectively.  It's essential to consult with a healthcare professional, preferably an otolaryngologist, to determine the most appropriate treatment plan for septal perforation based on individual circumstances and the severity of the condition. In some cases, surgical intervention may be necessary, especially if the perforation is large or causing significant symptoms. | Consistent | 1 | 1 | 1 |
| 1. What is Sluder neuralgia? | Sluder neuralgia, also known as sphenopalatine ganglion neuralgia or Sluder syndrome, is a rare form of neuralgia that affects the nerves in the face and head. It involves inflammation or irritation of the sphenopalatine ganglion, which is a cluster of nerve cells located behind the nose. This condition can cause severe pain in the area around the eyes, nose, forehead, and temples. The pain may be sharp, stabbing, or throbbing and can be accompanied by other symptoms such as nasal congestion, tearing of the eyes, and sensitivity to light. Treatment options for Sluder neuralgia may include medications to manage pain and inflammation, nerve blocks, or in severe cases, surgical intervention. It's important for individuals experiencing symptoms suggestive of Sluder neuralgia to consult with a healthcare professional for proper diagnosis and management. | Consistent | 1 | 1 | 1 |
| Epistaxis |  |  |  |  |  |
| 1. What is the Kiesselbach plexus and what are the vascular structures involved? | The Kiesselbach plexus, also known as Little's area, is an area of vascular anastomoses (connections) in the anterior part of the nasal septum. It is named after the German otolaryngologist, Wilhelm Kiesselbach. This plexus is a common site for nosebleeds or epistaxis.  The vascular structures involved in the Kiesselbach plexus include branches of the following arteries:  1. Anterior ethmoidal artery (branch of the ophthalmic artery)  2. Superior labial artery (branch of the facial artery)  3. Greater palatine artery (branch of the maxillary artery)  4. Septal branch of the superior labial artery  These arteries anastomose in the anterior part of the nasal septum, forming a rich network of blood vessels. Due to its location and the delicate nature of the mucosa in this area, the Kiesselbach plexus is prone to bleeding, especially from minor trauma or irritation, which can lead to nosebleeds. | Consistent | 1 | 2 | 2 |
| 1. Where is the Woodrouf plexus and what are the vascular structures that form it? | The Woodruff plexus, also known as the uterovaginal plexus or the vaginal venous plexus, is a network of veins located in the female pelvis. It surrounds the vagina and connects various pelvic veins. This plexus plays a crucial role in draining blood from the reproductive organs and pelvic region.  The vascular structures that form the Woodruff plexus include:  1. Vaginal veins: These veins drain blood from the vagina and its surrounding tissues.  2. Uterine veins: These veins drain blood from the uterus.  3. Vesical veins: These veins drain blood from the bladder.  4. Urethral veins: These veins drain blood from the urethra.  5. Rectal veins: These veins drain blood from the rectum.  6. Pelvic veins: These veins are interconnected and form a network throughout the pelvic region, contributing to the blood drainage in the pelvis.  Together, these veins form a complex network that ensures proper blood drainage from the female reproductive organs and adjacent pelvic structures. | Consistent | 4 | 4 | 4 |
| 1. Where is the most common location of nose bleeding? | The most common location for nosebleeds is the front part of the nasal septum, which is the thin wall of tissue that separates the two sides of the nose. This area contains many small blood vessels that are susceptible to damage and bleeding, especially if irritated or injured. This type of nosebleed is known as anterior epistaxis. However, nosebleeds can also occur from deeper within the nose, which is referred to as posterior epistaxis, although this is less common. | Consistent | 2 | 1 | 1 |
| 1. What should a patient with nosebleed do first? | If a patient experiences a nosebleed, they should follow these steps:  1. **Stay Calm**: Nosebleeds can be unsettling, but it's important to remain calm. Most nosebleeds are not serious and can be treated effectively.  2. **Sit Up Straight**: The patient should sit up straight and lean slightly forward. This position helps prevent blood from flowing down the throat, which can cause nausea or choking.  3. **Pinch the Nostrils**: Using the thumb and index finger, the patient should pinch the soft part of the nose, just below the bridge. This pressure helps to stop the bleeding by compressing the blood vessels in the nose.  4. **Breathe Through the Mouth**: Breathing through the mouth can help reduce the risk of swallowing blood, which can cause stomach upset.  5. **Hold Pressure**: The patient should maintain pressure on the nostrils for at least 10-15 minutes without releasing to allow the blood vessels to constrict and the bleeding to stop.  6. **Apply Cold Compress**: After the bleeding has stopped, applying a cold compress or ice pack wrapped in a cloth to the bridge of the nose can help constrict blood vessels and reduce swelling.  7. **Avoid Tilting the Head Back**: Contrary to popular belief, tilting the head back can cause blood to flow down the throat, which may lead to choking or vomiting.  8. **Avoid Blowing the Nose**: Blowing the nose immediately after a nosebleed can dislodge any clots that may have formed and restart the bleeding.  9. **Seek Medical Attention if Necessary**: If the bleeding persists for more than 20-30 minutes despite applying pressure, if it's recurrent, or if it's accompanied by other symptoms such as dizziness, fainting, or difficulty breathing, medical attention should be sought.  Remember, these steps are general guidelines, and if there are specific medical conditions or concerns, it's best to consult with a healthcare professional for personalized advice. | Consistent | 1 | 1 | 1 |
| 1. What should be done first in the emergency clinic for a patient with nosebleeds? | When a patient presents with nosebleeds in an emergency clinic, the following steps should be taken:  1. **Assessment and Evaluation**: Quickly assess the severity of the nosebleed. Determine if it's minor, moderate, or severe. Also, evaluate if the bleeding is originating from one nostril or both, and if there are any other associated symptoms like dizziness, weakness, or difficulty breathing.  2. **Positioning**: Instruct the patient to sit upright and lean slightly forward. This position helps prevent blood from flowing down the back of the throat, which can cause nausea or vomiting.  3. **Direct Pressure**: Direct pressure is the most effective way to stop a nosebleed. Pinch the soft part of the nose, just below the bony bridge, and apply steady pressure for at least 10-15 minutes. Encourage the patient to breathe through their mouth during this time.  4. **Ice Pack**: Placing an ice pack or cold compress over the bridge of the nose can help constrict blood vessels and reduce bleeding. However, ensure that the ice pack is wrapped in a cloth to prevent direct contact with the skin.  5. **Assessment of Vital Signs**: Monitor the patient's vital signs, including pulse rate, blood pressure, and oxygen saturation if available. This helps determine the severity of the bleeding and the patient's overall condition.  6. **Examination for Underlying Causes**: While addressing the immediate bleeding, consider potential underlying causes such as trauma, hypertension, clotting disorders, or medication side effects.  7. **Further Treatment**: Depending on the severity and underlying cause of the nosebleed, further interventions may be necessary. This could include applying nasal packs, cauterization, or in severe cases, surgical intervention.  8. **Patient Education**: Provide the patient with information on how to prevent future nosebleeds, such as avoiding picking or blowing the nose forcefully, keeping the nasal passages moist with saline spray, and using a humidifier in dry environments.  9. **Follow-up**: Arrange for a follow-up appointment with a primary care physician or an otolaryngologist (ENT specialist) if needed, especially if the nosebleeds are recurrent or severe.  It's crucial to remain calm and reassure the patient throughout the process, as nosebleeds can be frightening but are often not life-threatening. If bleeding persists despite initial interventions or if the patient shows signs of significant blood loss or distress, seek immediate medical attention or transfer to a higher level of care. | Consistent | 1 | 1 | 1 |
| 1. What are the medical treatments that can be applied for nose bleeding? | Nosebleeds, also known as epistaxis, can occur due to various reasons such as dry air, trauma, nasal irritation, sinus infections, or underlying medical conditions. Treatment for nosebleeds can vary depending on the severity and cause of the bleeding. Here are some common medical treatments that can be applied for nosebleeds:  1. **First Aid Measures:**  - Sit upright and lean forward to prevent blood from flowing down the throat.  - Pinch the nostrils together and breathe through the mouth to apply pressure on the bleeding vessel.  - Avoid tilting the head back, as this may cause blood to flow down the throat.  - Apply an ice pack or cold compress to the bridge of the nose to constrict blood vessels and reduce bleeding.  2. **Topical Medications:**  - Nasal decongestants: Over-the-counter nasal sprays containing oxymetazoline or phenylephrine can help constrict blood vessels and reduce bleeding.  - Nasal saline sprays: These can help keep the nasal passages moist, reducing irritation and preventing further bleeding.  3. **Nasal Packing:**  - If initial measures fail to stop the bleeding, healthcare providers may use nasal packing to apply pressure to the bleeding vessel and promote clotting. Packing materials may include gauze strips, nasal balloons, or absorbable materials coated with substances like thrombin or epinephrine to aid in clot formation.  4. **Cauterization:**  - Silver nitrate or electrocautery may be used to cauterize the bleeding vessel, sealing it off to stop the bleeding. This procedure is typically performed by a healthcare professional.  5. **Nasal Surgery:**  - In severe cases or when other treatments fail to control recurrent nosebleeds, surgical procedures such as nasal cauterization, septal repair, or arterial ligation may be necessary to address underlying anatomical abnormalities or persistent bleeding.  6. **Medications:**  - In some cases, medications such as antifibrinolytics (e.g., tranexamic acid) or topical antibiotics may be prescribed to promote clotting and prevent infection.  It's essential to consult a healthcare professional for proper evaluation and management of nosebleeds, especially if they are frequent, severe, or associated with other symptoms. Additionally, individuals with underlying medical conditions such as high blood pressure or bleeding disorders may require specialized treatment or management. | Nosebleeds (epistaxis) are common and can result from various causes such as dry air, nasal trauma, allergies, infections, or underlying health conditions. Medical treatments vary depending on the severity, frequency, and cause of the nosebleed. Here are common medical treatments for nosebleeds:  ---  ## 1. **Immediate Management and First Aid**  Before medical intervention, first-aid measures include:  - **Pinching the nostrils**: Pinch just below the nasal bridge for 10-15 minutes.  - **Leaning forward**: Helps prevent swallowing blood.  - **Cold compress**: Applied to the nose or neck to constrict blood vessels.  ---  ## 2. **Medical Interventions**  ### **A. Nasal Packing**  - Gauze or specialized sponges (e.g., Merocel) are placed inside the nostril to apply pressure.  - In severe cases, inflatable nasal balloons like a **Rhino Rocket** can be used.  ### **B. Cauterization**  - **Chemical cauterization**: Silver nitrate sticks are used to seal bleeding vessels.  - **Electrical cauterization**: Involves applying electric current to coagulate the vessel.  ### **C. Nasal Sprays and Topical Treatments**  - **Vasoconstrictive agents**: Nasal sprays like oxymetazoline or phenylephrine help constrict blood vessels.  - **Topical antibiotics**: For infections or crusting (e.g., mupirocin or bacitracin).  - **Moisturizers or saline sprays**: To maintain nasal mucosa hydration.  ---  ## 3. **Surgical Options**  - **Ligation of arteries**: Tying off blood vessels, such as the sphenopalatine artery.  - **Endoscopic procedures**: Minimally invasive surgery to address structural abnormalities causing recurrent nosebleeds.  ---  ## 4. **Treatment of Underlying Conditions**  - **Managing high blood pressure**: If hypertension is contributing.  - **Blood-thinning medication adjustments**: In consultation with a physician, reducing or changing anticoagulants like aspirin or warfarin.  - **Allergy treatment**: Antihistamines or steroid nasal sprays for chronic allergies.  ---  ## 5. **Prevention Techniques**  - **Humidifiers**: Reduce dryness in the air.  - **Avoid nasal trauma**: Refrain from nose-picking or aggressive blowing.  - **Stop smoking**: Smoking irritates nasal passages and increases the risk of bleeding.  ---  ### **When to Seek Emergency Care**  - Bleeding lasts more than 20 minutes.  - Large amounts of blood loss or frequent recurrence.  - Symptoms of anemia (e.g., fatigue, dizziness) or significant trauma.  Medical treatments should always be guided by a healthcare professional, especially for recurrent or severe cases. | 2 | 2 | 2----1 |
| 1. What are the surgical interventions that can be performed for nose bleeding? | Surgical interventions for nosebleeds, medically known as epistaxis, are typically reserved for cases where conservative measures have failed or in situations where the bleeding is recurrent or severe. Here are some surgical interventions that may be performed for nosebleeds:  1. Cauterization: This involves using heat, chemicals, or electric current to burn or destroy the blood vessels causing the bleeding. Cauterization can be done using various techniques, including chemical cautery (silver nitrate), electrocautery, or laser cautery.  2. Nasal packing: Nasal packing involves placing special gauze or inflatable balloons into the nasal cavity to put pressure on the bleeding vessels and promote clotting. This may be done with absorbable or non-absorbable materials. Nasal packing can be uncomfortable and is usually reserved for severe or recurrent nosebleeds.  3. Nasal septal surgery: In cases where the bleeding is originating from a specific area of the nasal septum (the wall that separates the nostrils), surgical procedures such as septoplasty or septal cauterization may be performed to correct the underlying issue.  4. Arterial ligation: In rare and severe cases of recurrent nosebleeds that cannot be controlled by other means, surgical ligation (tying off) of the arteries that supply blood to the nose may be considered. This procedure is typically reserved for cases where other treatments have failed and is usually performed under general anesthesia.  5. Endoscopic sinus surgery: For nosebleeds related to underlying sinus problems, such as nasal polyps or sinusitis, endoscopic sinus surgery may be necessary to remove the source of the bleeding and improve nasal airflow and drainage.  6. Embolization: In some cases of severe or recurrent nosebleeds, particularly those originating from deep within the nasal cavity or from blood vessels that are difficult to access surgically, embolization may be performed. This procedure involves injecting a substance (such as gel foam or tiny particles) into the blood vessels to block blood flow and stop the bleeding.  It's important to note that the specific surgical intervention chosen will depend on the underlying cause and severity of the nosebleed, as well as individual patient factors and preferences. These procedures are typically performed by otolaryngologists (ear, nose, and throat specialists) or rhinologists (specialists in diseases and disorders of the nose and sinuses). | Consistent | 1 | 1 | 1 |
| 1. What are the diseases that may be associated with nosebleeds? | Nosebleeds, medically known as epistaxis, can be associated with various conditions. While they are often benign and may result from minor irritations or injuries, they can also be indicative of underlying health issues. Some diseases and conditions that may be associated with nosebleeds include:  1. **Trauma or Injury**: Nosebleeds commonly occur due to trauma or injury to the nose, such as picking the nose, vigorous nose blowing, or getting hit in the nose.  2. **Dry Air**: Dry air can cause the nasal membranes to become dry and cracked, leading to nosebleeds. This is particularly common in dry climates or during winter when indoor heating reduces humidity.  3. **Sinusitis**: Inflammation of the sinuses (sinusitis) can lead to nasal congestion and irritation, increasing the risk of nosebleeds.  4. **Allergies**: Allergic reactions can cause inflammation and irritation in the nasal passages, which may result in nosebleeds.  5. **Nasal Infections**: Infections of the nasal passages, such as viral or bacterial infections, can cause inflammation and irritation, leading to nosebleeds.  6. **Nasal Polyps**: Nasal polyps are noncancerous growths that can develop in the lining of the nasal passages or sinuses. They may cause nasal congestion and recurrent nosebleeds.  7. **High Blood Pressure (Hypertension)**: Uncontrolled high blood pressure can sometimes lead to nosebleeds, although it is not a common symptom.  8. **Blood Disorders**: Certain blood disorders, such as hemophilia or von Willebrand disease, can affect the blood's ability to clot properly, increasing the likelihood of nosebleeds.  9. **Liver Disease**: Liver disease can lead to abnormalities in the blood clotting process, potentially causing nosebleeds.  10. **Certain Medications**: Some medications, such as blood thinners (anticoagulants) or nonsteroidal anti-inflammatory drugs (NSAIDs), may increase the risk of nosebleeds.  11. **Nasal Tumors**: Though relatively rare, tumors in the nasal passages or sinuses can cause persistent nosebleeds.  12. **Hereditary Hemorrhagic Telangiectasia (HHT)**: Also known as Osler-Weber-Rendu syndrome, HHT is a genetic disorder characterized by abnormal blood vessel formation, which can lead to recurrent nosebleeds.  If you experience frequent or severe nosebleeds, it's important to consult a healthcare professional for proper evaluation and management, especially if there are underlying health conditions that need to be addressed. | Consistent | 1 | 2 | 2 |
| Olfaction |  |  |  |  |  |
| 1. Where is the olfactory epithelium located in the nose? | The olfactory epithelium is located within the upper part of the nasal cavity. It lines the roof of the nasal cavity, which is also known as the nasal roof or nasal septum. This specialized tissue contains olfactory receptor cells responsible for detecting odors and transmitting signals to the brain, allowing us to perceive smells. | The **olfactory epithelium** is located in the **upper part of the nasal cavity**, specifically along the **roof of the nasal cavity**, the **superior portion of the nasal septum**, and the **superior nasal conchae**. This specialized tissue contains olfactory receptor neurons responsible for detecting smells and transmitting signals to the brain through the olfactory bulb.  It is positioned relatively high within the nose, which is why sniffing helps bring odor molecules closer to this area, enhancing the sense of smell. | 2 | 2 | 2---1 |
| 1. Describe the olfactory tractus. | The olfactory tract is a part of the olfactory system responsible for processing and relaying information about smell from the nose to the brain. It consists of a series of neural pathways connecting the olfactory epithelium in the nasal cavity to the olfactory bulb and further to higher brain regions involved in olfactory perception.  Here's a brief description of the olfactory tract:  1. **Olfactory Epithelium**: This is the first stage of the olfactory system located in the upper part of the nasal cavity. It contains specialized sensory neurons called olfactory receptor neurons (ORNs) that detect odor molecules in the air.  2. **Olfactory Nerve (Cranial Nerve I)**: The olfactory receptor neurons extend their axons through small openings in the skull called the cribriform plate and form the olfactory nerve. This nerve carries sensory information from the olfactory epithelium to the olfactory bulb.  3. **Olfactory Bulb**: The olfactory nerve fibers synapse in the olfactory bulb, which is a structure located at the base of the brain. Within the olfactory bulb, there are various types of neurons that process and integrate the olfactory signals. These include mitral cells, tufted cells, and granule cells.  4. **Olfactory Tract**: After processing in the olfactory bulb, the olfactory information is transmitted via the olfactory tract. The olfactory tract is a bundle of nerve fibers that extends from the olfactory bulb to several regions in the brain, including the olfactory cortex, amygdala, and other areas of the limbic system.  5. **Projection to Higher Brain Regions**: From the olfactory tract, the processed olfactory information is relayed to higher brain regions involved in olfactory perception, memory, and emotional responses. These regions include the primary olfactory cortex, located in the temporal lobe, as well as other areas of the limbic system, such as the amygdala and hippocampus.  Overall, the olfactory tract serves as a critical pathway for transmitting olfactory information from the nasal cavity to the brain, where it is processed and interpreted to perceive smells and trigger appropriate behavioral and emotional responses. | Consistent | 1 | 1 | 1 |
| 1. Describe the types of olfactory dysfunction and mention about the most common causes. | Olfactory dysfunction refers to a partial or complete loss of the sense of smell, which can significantly impact one's quality of life and overall health. There are several types of olfactory dysfunction, including:  1. **Anosmia**: Anosmia is the complete loss of the sense of smell. People with anosmia cannot detect any odors at all.  2. **Hyposmia**: Hyposmia is a reduced ability to detect odors. Individuals with hyposmia have a diminished sense of smell, but it is not completely absent.  3. **Parosmia**: Parosmia is a distortion of the sense of smell. It causes individuals to perceive odors differently than they actually are. For example, a normally pleasant smell may be perceived as foul or vice versa.  4. **Phantosmia**: Phantosmia is the perception of odors that aren't actually present. Individuals with phantosmia may smell things that others cannot, and these phantom odors are typically unpleasant.  The causes of olfactory dysfunction can vary, and sometimes the exact cause remains unknown. Some common causes include:  1. **Upper Respiratory Tract Infections**: Viral infections such as the common cold or flu can cause temporary olfactory dysfunction due to inflammation of the nasal passages.  2. **Sinusitis**: Inflammation of the sinuses can lead to congestion and blockage of the nasal passages, impairing the sense of smell.  3. **Head Trauma**: Injury to the head, particularly to the olfactory nerves or brain regions responsible for processing smell, can result in olfactory dysfunction.  4. **Nasal Polyps**: Noncancerous growths in the nasal passages can obstruct airflow and impair the sense of smell.  5. **Age-related Decline**: Olfactory function tends to decline with age, and elderly individuals may experience a gradual loss of smell.  6. **Neurological Conditions**: Certain neurological disorders such as Alzheimer's disease, Parkinson's disease, and multiple sclerosis can affect the sense of smell.  7. **Medications**: Some medications, particularly those used in chemotherapy or for treating high blood pressure, can cause olfactory dysfunction as a side effect.  8. **Toxic Exposures**: Exposure to certain chemicals or toxins, such as those found in cigarette smoke or industrial pollutants, can damage the olfactory system.  9. **Genetic Factors**: In some cases, olfactory dysfunction may be inherited due to genetic mutations affecting the development or function of the olfactory system.  Treatment for olfactory dysfunction depends on the underlying cause and may include medications, nasal sprays, surgery (for conditions like nasal polyps), or smell training exercises to help improve olfactory function. In some cases, olfactory dysfunction may resolve on its own, especially if it is due to a temporary condition like a cold or sinus infection. However, persistent or severe olfactory dysfunction should be evaluated by a healthcare professional to determine the cause and appropriate treatment. | Consistent | 1 | 2 | 2 |
| 1. What is cacosmia? In which diseases is it seen? | Cacosmia refers to a condition where a person perceives smells inaccurately or experiences unpleasant smells that aren't present. It is a type of olfactory dysfunction. Cacosmia can significantly impact a person's quality of life, as it can interfere with eating, drinking, and overall enjoyment of life.  Cacosmia can occur in several diseases and conditions, including:  1. **Sinusitis:** Sinus infections, particularly chronic sinusitis, can cause inflammation and infection that affect the olfactory system, leading to cacosmia.  2. **Nasal polyps:** Noncancerous growths in the nasal cavity or sinuses can obstruct airflow and interfere with the sense of smell, leading to cacosmia.  3. **Head trauma:** Injuries to the head, especially those affecting the olfactory nerves or brain regions involved in processing smell, can result in distorted or unpleasant perceptions of smell.  4. **Neurological disorders:** Conditions such as Alzheimer's disease, Parkinson's disease, multiple sclerosis, and epilepsy can sometimes cause cacosmia as a symptom.  5. **Psychiatric disorders:** In some cases, cacosmia may have a psychological or psychosomatic basis, particularly in individuals with conditions like depression, anxiety, or post-traumatic stress disorder (PTSD).  6. **Medication side effects:** Some medications can alter the sense of smell or cause cacosmia as a side effect. Chemotherapy drugs, for example, are known to affect smell perception in some individuals.  7. **Other causes:** Cacosmia can also be caused by exposure to certain chemicals or environmental toxins, as well as by hormonal changes or metabolic disorders.  If someone experiences persistent cacosmia or any other changes in their sense of smell, it's crucial to consult a healthcare professional for proper evaluation and diagnosis. Treatment will depend on identifying and addressing the underlying cause, which may involve medications, surgery, or other interventions, depending on the specific condition. | Consistent | 1 | 1 | 1 |
| 1. What is hyposmia? In which diseases is it seen? | Hyposmia is a medical term that refers to a reduced ability to detect or perceive odors. It is essentially a partial loss of the sense of smell. This condition can vary in severity, ranging from mild to severe, and it can be temporary or chronic.  Hyposmia can occur due to various reasons, including:  1. **Upper respiratory tract infections:** Common colds, sinus infections, and other respiratory illnesses can cause temporary hyposmia.  2. **Nasal congestion:** Anything that blocks the nasal passages, such as allergies, nasal polyps, or structural abnormalities, can lead to hyposmia.  3. **Head injuries:** Trauma to the head, particularly involving the olfactory nerves or the areas of the brain responsible for processing smell, can cause hyposmia.  4. **Age-related changes:** Hyposmia is relatively common among older adults, as the sense of smell tends to decline with age.  5. **Neurological disorders:** Certain neurological conditions, such as Alzheimer's disease, Parkinson's disease, multiple sclerosis, and others, can be associated with hyposmia.  6. **Endocrine disorders:** Conditions like hypothyroidism or diabetes can affect the sense of smell.  7. **Medications:** Some medications, particularly those that affect the nervous system or mucous membranes, may cause hyposmia as a side effect.  8. **Toxic exposure:** Exposure to certain chemicals or toxins, such as heavy metals or solvents, can damage the olfactory nerves and result in hyposmia.  9. **Genetic conditions:** Some individuals may have congenital abnormalities that affect their sense of smell.  It's important to note that hyposmia can have significant impacts on a person's quality of life, as it can affect their ability to enjoy food, detect dangers such as spoiled food or gas leaks, and even impair social interactions. If someone experiences persistent hyposmia, they should consult a healthcare professional for proper evaluation and management. | Consistent | 1 | 1 | 1 |
| 1. Is there a relationship between nasal congestion and odor diseases? | Nasal congestion can be associated with various conditions that affect the nasal passages and sinuses, including infections, allergies, and structural issues such as nasal polyps or deviated septum. While nasal congestion itself may not directly cause odor diseases, it can contribute to conditions where odor perception is altered or affected.  Certain conditions that cause nasal congestion, such as sinus infections or allergic rhinitis, may also lead to changes in the sense of smell or taste. For example, during a sinus infection, the buildup of mucus and inflammation can affect the olfactory nerves responsible for smell, leading to a decreased ability to detect odors or even distortions in smell perception.  Additionally, nasal congestion can contribute to conditions like postnasal drip, where excess mucus accumulates in the back of the throat. This can sometimes lead to bad breath (halitosis) due to bacteria feeding on the trapped mucus.  However, it's essential to note that not all cases of nasal congestion will result in odor-related issues, and not all odor diseases are directly linked to nasal congestion. If you're experiencing persistent nasal congestion or changes in your sense of smell, it's essential to consult with a healthcare professional for an accurate diagnosis and appropriate treatment. | Consistent | 1 | 1 | 1 |
| 1. What are the systemic diseases that can cause loss of smell? | Loss of smell, medically known as anosmia, can be caused by various systemic diseases. Some of the systemic diseases associated with loss of smell include:  1. **Upper Respiratory Tract Infections**: Common cold, flu, sinus infections, and other upper respiratory infections can lead to temporary anosmia due to inflammation and congestion of the nasal passages.  2. **COVID-19**: The COVID-19 pandemic brought attention to anosmia as one of the common symptoms associated with the disease caused by the SARS-CoV-2 virus.  3. **Nasal Polyps**: These growths in the nasal passages can obstruct airflow and interfere with the sense of smell.  4. **Allergic Rhinitis**: Chronic inflammation of the nasal passages due to allergies can result in diminished olfactory function.  5. **Head Trauma**: Traumatic brain injury or head trauma can damage the olfactory nerves or disrupt the olfactory pathways, leading to anosmia.  6. **Neurological Disorders**: Conditions such as Parkinson's disease, Alzheimer's disease, multiple sclerosis, and brain tumors can affect the olfactory nerves or brain regions involved in processing smell.  7. **Endocrine Disorders**: Hormonal imbalances, particularly thyroid disorders, can sometimes lead to changes in the sense of smell.  8. **Autoimmune Diseases**: Some autoimmune conditions, such as Sjögren's syndrome, can affect the mucous membranes of the nasal passages, leading to anosmia.  9. **Diabetes**: Uncontrolled diabetes can damage nerves throughout the body, including the olfactory nerves, potentially causing anosmia.  10. **Chronic Sinusitis**: Persistent inflammation and infection of the sinuses can lead to long-term loss of smell.  11. **Cushing's Syndrome**: This hormonal disorder can affect various bodily functions, including the sense of smell.  12. **Nutritional Deficiencies**: Deficiencies in certain vitamins and minerals, such as vitamin B12 or zinc, can impact the sense of smell.  13. **Medications**: Certain medications, particularly those used in chemotherapy or for treating psychiatric disorders, can cause temporary or permanent anosmia as a side effect.  It's important for individuals experiencing loss of smell to consult with a healthcare professional to determine the underlying cause and appropriate treatment. | Consistent | 3 | 3 | 3 |
| 1. What does phantosmia mean? | Phantosmia refers to the perception of odor in the absence of any actual odor-producing stimulus. It's essentially experiencing smells that aren't present. This can sometimes be caused by neurological or psychiatric conditions, nasal congestion, or even certain medications. It's important for individuals experiencing phantosmia to consult a healthcare professional for proper evaluation and treatment, as it can sometimes be a symptom of an underlying medical issue. | Consistent | 1 | 1 | 1 |
| 1. What are the tests that used to evaluate olfaction? | Several tests are commonly used to evaluate olfaction (the sense of smell). These tests are designed to assess various aspects of olfactory function, including odor detection, identification, discrimination, and threshold sensitivity. Some of the most widely used tests include:  1. **Sniffin' Sticks Test**: This is a widely used test battery for assessing olfactory function. It consists of three subtests: odor threshold, odor discrimination, and odor identification.  2. **University of Pennsylvania Smell Identification Test (UPSIT)**: UPSIT is a standardized olfactory test that involves the identification of 40 microencapsulated odors. It's often used in clinical and research settings to assess olfactory function.  3. **Connecticut Chemosensory Clinical Research Center Test (CCCRC)**: This test evaluates both olfactory and gustatory function. It includes assessments for odor threshold, odor discrimination, and odor identification.  4. **Butanol Threshold Test**: This test measures the lowest concentration of butanol (a common solvent with a distinct smell) that a person can detect. It's a simple and widely used method for assessing olfactory threshold sensitivity.  5. **Sniffin' Sticks Odor Threshold Test**: Similar to the butanol threshold test, this method assesses the lowest concentration of various odors that a person can detect. It's part of the Sniffin' Sticks test battery.  6. **Olfactory Threshold Test**: This test measures the lowest concentration of a specific odorant that can be detected by an individual. It's often used in clinical settings to assess olfactory sensitivity.  7. **Odor Discrimination Test**: In this test, individuals are asked to differentiate between different odors presented to them. It helps assess the ability to discriminate between similar smells.  8. **Olfactory Event-Related Potentials (OERP)**: This is a neurophysiological technique used to measure brain responses to olfactory stimuli. It provides objective measures of olfactory function by recording electrical activity in response to odor presentation.  9. **Cross-Cultural Smell Identification Test (CC-SIT)**: This test is similar to the UPSIT but includes odors more recognizable across different cultures. It's useful in multicultural settings where certain odors may not be familiar to all participants.  These tests vary in complexity and are often chosen based on the specific needs of the assessment, the population being tested, and the resources available. Additionally, combining multiple tests can provide a more comprehensive evaluation of olfactory function. | Consistent | 1 | 1 | 1 |
| Nasal skeleton and rhinoplasty |  |  |  |  |  |
| 1. What are the nasal tip support mechanisms? | The nasal tip support mechanisms refer to the structures and components that provide structural integrity and support to the nasal tip. These mechanisms are crucial for maintaining the shape, projection, and function of the nasal tip. Some of the key nasal tip support mechanisms include:  1. Lower Lateral Cartilages (LLCs): The lower lateral cartilages are the primary structural components of the nasal tip. They provide shape and support to the tip region. The medial crura and lateral crura of the lower lateral cartilages form the framework of the nasal tip.  2. Nasal Septum: The nasal septum, which divides the nasal cavity into two halves, contributes to the support of the nasal tip. It provides structural support and stability to the entire nose, including the tip region.  3. Nasal Ligaments: Various ligaments within the nose provide support and maintain the position of the nasal tip. These ligaments include the medial crural footplates, intercrural ligament, and accessory cartilages.  4. Soft Tissue Envelope: The soft tissue envelope, including the skin and subcutaneous tissue covering the nasal tip, also contributes to its support. The thickness and quality of the soft tissue envelope play a role in determining the contour and appearance of the nasal tip.  5. Alar Cartilages: The alar cartilages, also known as the lateral crus of the lower lateral cartilage, contribute to the support and shape of the nasal tip. These cartilages extend from the nasal bridge to the nostrils and play a role in defining the width and contour of the nasal tip.  6. Overlying Skin: The skin covering the nasal tip provides support and contributes to its overall appearance. The thickness, elasticity, and quality of the skin influence the shape and definition of the nasal tip.  7. Fibrous Tissue: Various fibrous tissues, including the fibrous connections between the lower lateral cartilages, septum, and surrounding structures, contribute to the stability and support of the nasal tip.  Overall, the interaction and coordination of these nasal tip support mechanisms are essential for maintaining the shape, projection, and function of the nasal tip. Imbalances or weaknesses in any of these components can lead to nasal tip deformities or functional issues that may require surgical intervention for correction. | Consistent | 2 | 1 | 2 |
| 1. What are the bone and cartilage structures that make up the nasal skeleton? | The nasal skeleton is composed of several bones and cartilages that form the structure of the nose. These include:  1. Nasal Bones: These are two small oblong bones that lie side by side at the bridge of the nose. They form the upper part of the nasal bridge.  2. Maxillary Bones: The maxilla bones contribute to the structure of the nasal cavity and support the nasal base. They articulate with the nasal bones superiorly.  3. Nasal Cartilages:  - Septal Cartilage: This is a flexible hyaline cartilage that forms the anterior part of the nasal septum, which divides the nasal cavity into two nostrils.  - Lateral Cartilages: These cartilages are paired and contribute to the structure of the external nose. They form the lateral walls of the nose and help maintain its shape.  - Greater Alar Cartilages: Also known as the lower lateral cartilages, they form the tip and sides of the nose and help support the nostrils.  - Lesser Alar Cartilages: These smaller cartilages are located superiorly to the greater alar cartilages and contribute to the support of the nasal tip.  These bones and cartilages work together to provide structural support to the nose and help in functions such as breathing and olfaction. | Consistent | 1 | 1 | 1 |
| 1. What does saddle nose deformity mean? | Saddle nose deformity, also known as saddle nose or nasal saddle deformity, refers to a condition where the bridge of the nose has collapsed or lost its height, resulting in a characteristic depression or "saddle-like" appearance. This deformity can be caused by various factors, including:  1. Trauma: Nasal injuries, such as fractures or blunt force trauma, can damage the nasal bones and cartilage, leading to a collapsed bridge.  2. Congenital defects: Some individuals may be born with structural abnormalities or deficiencies in the nasal bones and cartilage that predispose them to developing saddle nose deformity.  3. Inflammatory conditions: Chronic inflammation of the nasal tissues, such as from autoimmune diseases like granulomatosis with polyangiitis (formerly known as Wegener's granulomatosis) or certain infections, can cause destruction of nasal cartilage and subsequent collapse of the nasal bridge.  4. Surgical complications: Improperly performed or overly aggressive nasal surgeries, such as rhinoplasty, septoplasty, or sinus surgery, can result in saddle nose deformity if too much cartilage or bone is removed or if there is inadequate structural support left in the nose.  Saddle nose deformity can lead to functional problems such as difficulty breathing through the nose, as well as aesthetic concerns. Treatment options depend on the underlying cause and severity of the deformity and may include surgical reconstruction using cartilage grafts or implants to restore nasal height and contour. | Consistent | 1 | 1 | 1 |
| 1. Write the etiological reasons for saddle nose deformity. | Saddle nose deformity refers to the collapse of the bridge of the nose, resulting in a depression or "saddle-like" appearance. This deformity can occur due to various etiological factors, including:  1. **Trauma**: One of the most common causes of saddle nose deformity is trauma to the nose, such as a direct blow or injury. This trauma can damage the supporting structures of the nose, including the nasal bones and cartilage, leading to collapse and deformity.  2. **Nasal Fractures**: Fractures of the nasal bones or septum can disrupt the structural integrity of the nose, resulting in saddle nose deformity. Improperly treated nasal fractures or failure to address them promptly can contribute to the development of this deformity.  3. **Nasal Surgery**: Previous nasal surgeries, particularly those involving the septum or nasal dorsum, can sometimes lead to saddle nose deformity. Inadequate support or over-resection of nasal cartilage during surgery may weaken the nasal framework, causing it to collapse.  4. **Inflammatory Conditions**: Certain inflammatory conditions affecting the nasal septum and surrounding structures can predispose individuals to saddle nose deformity. Conditions such as granulomatosis with polyangiitis (formerly known as Wegener's granulomatosis), sarcoidosis, and relapsing polychondritis can cause chronic inflammation and destruction of nasal cartilage, leading to nasal deformities including saddle nose.  5. **Infections**: Severe infections of the nasal septum or surrounding tissues, such as severe nasal cellulitis or osteomyelitis, can cause destruction of nasal cartilage and subsequent saddle nose deformity.  6. **Congenital Abnormalities**: Rarely, congenital conditions affecting nasal cartilage development or structure can result in saddle nose deformity. These abnormalities may include conditions like congenital syphilis or certain genetic disorders affecting cartilage development.  7. **Drug Abuse**: Prolonged and excessive use of intranasal drugs, particularly cocaine, can damage the nasal septum and cartilage, leading to nasal deformities including saddle nose.  8. **Tumors**: Rarely, tumors of the nasal septum or surrounding structures may cause destruction of nasal cartilage and result in saddle nose deformity.  It's important to note that saddle nose deformity often results from a combination of factors, and the specific etiology can vary among individuals. Treatment typically involves addressing the underlying cause, reconstructive surgery, or both, depending on the severity and underlying pathology. | Consistent | 1 | 1 | 1 |
| 1. What are the predsposing factors for internal nasal valve insufficiency after rhinoplasty? | Internal nasal valve insufficiency after rhinoplasty can occur due to various factors. Predisposing factors for this condition include:  1. **Pre-existing Nasal Valve Narrowing:** Patients who already have a narrow internal nasal valve prior to rhinoplasty may be more susceptible to postoperative insufficiency.  2. **Surgical Technique:** Improper surgical techniques during rhinoplasty, such as excessive resection of nasal cartilage or inadequate structural support, can compromise the integrity of the internal nasal valve.  3. **Over-Reduction of Nasal Structures:** Aggressive reduction of nasal structures, particularly the upper lateral cartilages and septum, can weaken the nasal sidewall and lead to internal nasal valve collapse.  4. **Inadequate Support:** Lack of appropriate structural support within the nasal framework, such as inadequate reinforcement of the nasal sidewalls or failure to preserve or reconstruct the nasal cartilage, can contribute to valve insufficiency.  5. **Scar Tissue Formation:** Excessive scarring or fibrosis in the nasal soft tissues following surgery may restrict airflow through the nasal valve region.  6. **Septal Deviation:** Rhinoplasty procedures that do not adequately address pre-existing septal deviations can result in asymmetry and functional impairment of the nasal valve.  7. **Postoperative Edema:** Swelling and edema following rhinoplasty can temporarily compromise nasal airflow and contribute to internal nasal valve insufficiency.  8. **Poor Wound Healing:** Individuals with predispositions to poor wound healing or scarring may be at increased risk for complications such as nasal valve collapse after rhinoplasty.  9. **Inadequate Assessment and Planning:** Insufficient preoperative evaluation of nasal anatomy and airflow dynamics, as well as inadequate surgical planning, can lead to suboptimal outcomes and functional impairment of the nasal valve.  10. **Underlying Nasal Pathology:** Conditions such as nasal valve stenosis, septal perforation, or nasal valve collapse due to weak cartilage may predispose patients to postoperative nasal valve insufficiency if not properly addressed during rhinoplasty.  It's important for surgeons to carefully evaluate each patient's nasal anatomy, airflow dynamics, and functional concerns before performing rhinoplasty to minimize the risk of internal nasal valve insufficiency and other postoperative complications. Additionally, proper surgical techniques and adequate structural support should be employed to optimize both aesthetic and functional outcomes. | Consistent | 1 | 2 | 2 |
| 1. What is Pollybeak deformity? What are the reasons? | Pollybeak deformity is a term used in plastic surgery to describe a specific type of nasal deformity. It refers to a situation where there is a noticeable convexity or fullness in the nasal bridge, resembling the shape of a parrot's beak. This deformity can occur after rhinoplasty (nose job) when the nasal dorsum (bridge) has not been properly managed or reshaped.  There are several reasons why Pollybeak deformity may occur after rhinoplasty:  1. **Incomplete Removal of Dorsal Hump**: If the surgeon fails to adequately reduce a dorsal hump (a raised area on the bridge of the nose), it can lead to an excessive fullness or convexity on the bridge, causing the Pollybeak deformity.  2. **Inadequate Cartilage Support**: Insufficient structural support within the nose, often due to inadequate cartilage grafting or weakening of the nasal framework, can contribute to the development of a Pollybeak deformity.  3. **Over-resection of Lower Lateral Cartilages**: If the lower lateral cartilages (which shape the tip of the nose) are excessively trimmed during surgery, it can alter the balance of the nasal structures and result in a Pollybeak appearance.  4. **Poor Scar Tissue Formation**: Improper healing or excessive scar tissue formation in the area between the nasal bridge and tip can cause an unnatural convexity in the nasal profile.  5. **Swelling and Scar Contracture**: In some cases, post-operative swelling or scar contracture (the tightening of scar tissue) can contribute to the development of a Pollybeak deformity.  6. **Inadequate Projection of the Nasal Tip**: If the nasal tip is not adequately projected or rotated during rhinoplasty, it can create an imbalance between the nasal bridge and tip, resulting in a Pollybeak appearance.  Treatment for Pollybeak deformity often involves revision rhinoplasty, where the surgeon addresses the underlying causes of the deformity to achieve a more balanced and natural nasal contour. This may involve techniques such as cartilage grafting, scar revision, or reshaping of the nasal structures to restore harmony to the nasal profile. | Consistent | 1 | 2 | 1 |
| 1. What are the types of osteotomy in rhinoplasty? | In rhinoplasty, osteotomy refers to the surgical technique used to reshape or reposition the nasal bones. There are several types of osteotomies commonly employed in rhinoplasty procedures:  1. **Medial Osteotomy**: This involves cutting the nasal bones close to the midline (medial) to narrow the nasal width. It's often used to correct a wide nasal bridge.  2. **Lateral Osteotomy**: Lateral osteotomy involves cutting the nasal bones near the sidewalls of the nose to reposition them outward or inward, depending on the desired outcome. This technique is typically used to narrow the nasal bones or correct asymmetries.  3. **Periosteal Flap Technique**: This technique involves lifting the periosteum (the tissue covering the bones) to preserve the blood supply to the bones during osteotomy. It can help reduce the risk of complications such as bone irregularities or necrosis.  4. **Infracture Osteotomy**: Infracture osteotomy involves repositioning the nasal bones inward, towards the center of the face. This technique is commonly used to narrow the nasal bridge or correct nasal deviations.  5. **Outfracture Osteotomy**: Outfracture osteotomy involves repositioning the nasal bones outward. It is typically used to widen the nasal airway or correct certain nasal deformities.  6. **Internal Osteotomy**: Internal osteotomy involves making incisions inside the nostrils to access and reshape the nasal bones without creating external scars. This technique is often used in closed rhinoplasty procedures.  7. **External Osteotomy**: External osteotomy involves making incisions on the outside of the nose, typically along the sidewalls, to access and reshape the nasal bones. This technique is commonly used in open rhinoplasty procedures.  The selection of osteotomy technique depends on various factors such as the patient's nasal anatomy, the desired outcome of the surgery, and the surgeon's expertise and preference. Each type of osteotomy has its advantages and limitations, and the surgeon will choose the most appropriate technique or combination of techniques to achieve the best possible results for the patient. | Consistent | 2 | 2 | 2 |
| 1. What is the mechanism of Rocker deformity in rhinoplasty? | Rocker deformity, also known as a "polly beak" deformity, is a complication that can occur after rhinoplasty surgery. It is characterized by a prominent convexity or fullness in the supratip area of the nose, creating a shape resembling the hump of a bird's beak. This deformity occurs due to several factors, including:  1. **Over-resection of the dorsal hump:** If too much cartilage and bone are removed from the nasal bridge during rhinoplasty, it can lead to collapse of the nasal sidewalls and an exaggerated convexity in the supratip area.  2. **Inadequate support:** Insufficient structural support to the nasal tip can contribute to the collapse of the nasal dorsum, resulting in the development of a polly beak deformity.  3. **Scar tissue formation:** Excessive scar tissue formation in the supratip area can cause an elevation or fullness in this region, contributing to the rocker deformity.  4. **Alar cartilage dynamics:** Alterations in the dynamics of the lower lateral cartilages, which support the nasal tip, can also affect the appearance of the supratip area.  To prevent or correct a polly beak deformity, surgical techniques may involve adding support to the nasal dorsum, reshaping or reinforcing the nasal tip, and addressing scar tissue if necessary. This may include using grafts or implants to provide structural support and stability to the nose. Additionally, careful planning and execution during the rhinoplasty procedure are essential to avoid over-resection of tissue and to maintain proper nasal tip support. | Consistent | 4 | 4 | 4 |
| 1. What is a tent pole deformity and what are the causes of it? | A "tent pole nose" deformity, also known as a "polly beak deformity," refers to a specific type of nasal deformity characterized by a prominent fullness or convexity in the region of the nasal dorsum just above the tip of the nose. This deformity gives the appearance of a tent pole or the shape of a parrot's beak, hence the term "polly beak."  Causes of tent pole nose deformity can include:  1. **Poor surgical technique**: In some cases, a tent pole nose deformity may result from inadequate or improper surgical techniques during rhinoplasty (nose surgery). This could involve over-resection of nasal cartilage or inadequate support of the nasal tip.  2. **Inadequate postoperative care**: Improper postoperative care, such as failure to adequately manage swelling or apply appropriate splinting or taping after rhinoplasty, may contribute to the development of this deformity.  3. **Nasal anatomy**: The natural anatomy of the nose can predispose some individuals to develop a tent pole deformity. Factors such as weak cartilage or excessive soft tissue may contribute to the appearance of a polly beak.  4. **Scar tissue formation**: Excessive scar tissue formation in the nasal dorsum area following surgery or trauma can contribute to the development of a tent pole nose deformity.  5. **Revision surgery complications**: In some cases, tent pole deformity can occur as a complication of revision rhinoplasty (secondary nose surgery) when attempts to correct a previous nasal deformity are not successful or result in further complications.  Treatment for tent pole nose deformity may involve revision rhinoplasty to address the underlying causes. This may include reshaping the nasal cartilage, reducing scar tissue, or providing additional support to the nasal tip to achieve a more balanced and aesthetically pleasing nasal contour. It's essential for individuals considering rhinoplasty or experiencing complications from previous nasal surgeries to consult with a qualified and experienced plastic surgeon or otolaryngologist for proper evaluation and treatment options. | Consistent | 4 | 4 | 4 |
| 1. Define the inverted-V deformity, what is the cause of it? What are the surgical methods to decrease middle vault deformities? | The inverted-V deformity is a common complication in rhinoplasty surgery where there is a collapse of the nasal middle vault, resulting in a characteristic appearance of an inverted V-shaped depression along the bridge of the nose. This deformity can occur due to various reasons, but it is often associated with excessive removal of dorsal cartilage or inadequate support of the middle vault during rhinoplasty. It can also be caused by trauma to the nose or previous surgical procedures.  Surgical methods to address middle vault deformities and prevent or correct the inverted-V deformity include:  1. Spreader grafts: These are cartilage grafts placed between the upper lateral cartilages and the septum to provide support and prevent collapse of the middle vault.  2. Spreader flaps: Similar to spreader grafts, these are tissue flaps created from the upper lateral cartilages to widen and support the middle vault.  3. Alar batten grafts: These are cartilage grafts placed along the lateral walls of the nose to provide additional support and prevent collapse.  4. Septal extension grafts: These grafts are placed along the septum to extend its support into the middle vault, helping to prevent collapse.  5. Dorsal onlay grafts: These grafts are placed on the dorsal aspect of the nasal bridge to increase its height and provide additional structural support.  6. Structural rhinoplasty techniques: These involve careful preservation and repositioning of nasal cartilage to maintain or restore support to the middle vault.  7. Spreader flap or graft combination with spreader flap or graft suture techniques: These combine various methods to provide comprehensive support to the middle vault and prevent deformities.  These surgical methods aim to restore or maintain the structural integrity of the middle vault, thereby reducing the risk of developing an inverted-V deformity and improving the aesthetic and functional outcomes of rhinoplasty surgery. It's essential for the surgeon to assess each individual case carefully and determine the most appropriate technique or combination of techniques based on the patient's anatomy and specific needs. | ### **Inverted-V Deformity**  The inverted-V deformity is a specific nasal contour irregularity that presents as an inverted "V" shape along the midline of the nose. It occurs when the upper lateral cartilages collapse or become disconnected from the nasal dorsum (bridge), causing a visible depression along the middle vault (the area between the bony dorsum and the lower lateral cartilages).  #### **Causes**  1. **Excessive Dorsal Hump Reduction**  - Over-resection of the bony and cartilaginous dorsum during rhinoplasty can leave the upper lateral cartilages unsupported.    2. **Loss of Upper Lateral Cartilage Support**  - Weakening or detachment of the upper lateral cartilages from the septum can result in collapse.  3. **Over-resection of the Nasal Bones**  - If the nasal bones are excessively narrowed during osteotomy, the lateral cartilages may collapse inward.  4. **Weak Cartilage Structure (Congenital or Post-traumatic)**  - In some cases, thin or inherently weak cartilage predisposes the patient to this deformity, either naturally or post-operatively.  #### **Surgical Methods to Correct or Prevent Middle Vault Deformities**  1. **Spreaders Grafts**  - Cartilage grafts (typically from the septum or ear) are placed between the septum and the upper lateral cartilages to restore structural integrity and widen the middle vault, preventing inward collapse.  2. **Spreader Flaps**  - This involves folding the upper lateral cartilages inward to act as both structural support and aesthetic enhancement, without the need for separate grafts.  3. **Autospreader Technique**  - Instead of removing the upper lateral cartilages, they are repositioned and attached in a way that mimics the function of a spreader graft. This is often used to maintain the natural nasal width while improving support.  4. **Use of Alar Batten Grafts**  - In cases where the deformity extends to the lower lateral cartilage or involves nasal obstruction, additional batten grafts are used to provide more structural reinforcement.  5. **Upper Lateral Cartilage Reattachment**  - If the upper lateral cartilages were detached from the septum during surgery, meticulous reattachment can help restore support and prevent the deformity.  6. **Middle Vault Reconstruction with Rib or Ear Cartilage**  - In severe cases, autologous rib cartilage or ear cartilage may be used to rebuild the middle vault, providing extra strength and structure.  These techniques aim not only to restore or maintain the aesthetic appearance of the nasal bridge but also to ensure functional nasal breathing. | 1 | 3 | 2----1 |
| Congenital diseases |  |  |  |  |  |
| 1. What is the frequency of choanal atresia? | Choanal atresia is a relatively rare congenital condition where the back of the nasal passage (choana) is blocked, typically by abnormal bony or membranous tissue. It occurs in approximately 1 in 5,000 to 1 in 8,000 live births. This makes it a relatively uncommon condition, but it can have significant implications for newborns as it can lead to respiratory difficulties shortly after birth if not promptly recognized and managed. | Consistent | 1 | 1 | 1 |
| 1. What is the importance of bilateral choanal atresia? | Bilateral choanal atresia is a congenital condition where the back of the nasal passage (choanae) is blocked, typically by bony or soft tissue obstruction. This condition is important due to its potential impact on an individual's ability to breathe properly through the nose. Here are some key points regarding the importance of bilateral choanal atresia:  1. **Respiratory Implications:** Bilateral choanal atresia can lead to significant respiratory distress, particularly in newborns. Breathing through the nose is essential for maintaining proper oxygen levels in the body. When both nasal passages are blocked, it can result in severe difficulty breathing, especially during feeding and sleep.  2. **Immediate Intervention:** Bilateral choanal atresia often requires immediate intervention upon birth. Newborns may present with cyanosis (bluish discoloration of the skin) due to oxygen deprivation. Prompt recognition and management are crucial to ensure adequate oxygenation and prevent complications.  3. **Feeding Difficulties:** Infants with bilateral choanal atresia may experience feeding difficulties because they cannot breathe through their nose while nursing. This can lead to poor feeding, inadequate weight gain, and even failure to thrive if not addressed promptly.  4. **Risk of Infection:** The blocked nasal passages can predispose individuals to recurrent upper respiratory tract infections and sinusitis. The stagnant mucus in the nasal passages provides an ideal environment for bacterial growth, increasing the risk of infections.  5. **Diagnostic Challenges:** Bilateral choanal atresia may not always be immediately recognized at birth, especially if other congenital anomalies are present. Diagnosis typically involves a physical examination, imaging studies such as CT scans, and possibly endoscopic evaluation by an otolaryngologist (ear, nose, and throat specialist).  6. **Treatment Options:** Management of bilateral choanal atresia usually involves surgical correction to open up the blocked nasal passages. The surgical approach may vary depending on the severity of the obstruction and individual patient factors. Early intervention is crucial to prevent respiratory compromise and associated complications.  In summary, bilateral choanal atresia is important to recognize and manage promptly due to its potential to cause significant respiratory distress, feeding difficulties, and increased susceptibility to infections in affected individuals, particularly newborns. Early diagnosis and appropriate intervention are essential for optimizing outcomes and preventing long-term complications. | Consistent | 1 | 2 | 2 |
| 1. What are the indications of choanal atresia surgery? Mention about the most common correction methods for choanal atresia | Choanal atresia is a congenital condition where the nasal passages are blocked, usually by bony or membranous tissue, which can lead to respiratory distress in newborns. The indications for choanal atresia surgery typically include:  1. Respiratory distress: Newborns with choanal atresia may have difficulty breathing through their noses, leading to respiratory distress, especially during feeding or sleeping.  2. Nasal obstruction: Choanal atresia can cause nasal congestion and obstruction, making it difficult for the infant to breathe through the nose.  3. Failure to thrive: Infants with severe choanal atresia may experience feeding difficulties and failure to gain weight adequately, which can lead to failure to thrive.  4. Recurrent respiratory infections: The blockage of nasal passages can increase the risk of recurrent respiratory infections due to poor airway clearance and ventilation.  The most common correction methods for choanal atresia include:  1. Surgical correction: Surgical intervention is the primary treatment for choanal atresia. The procedure involves removing the obstructing tissue to create an open passage between the nasal cavity and the nasopharynx. This can be done using various surgical techniques, including endoscopic or transnasal approaches.  2. Stenting: In some cases, temporary stenting may be used following surgery to keep the nasal passages open during the healing process. Stents are typically removed after a period of time once the airway has adequately healed.  3. Postoperative care: After surgery, patients require careful monitoring to ensure proper healing and to manage any complications such as bleeding or infection. Nasal irrigation and suctioning may also be recommended to maintain clear nasal passages.  4. Multidisciplinary approach: The management of choanal atresia often involves a multidisciplinary team, including otolaryngologists, neonatologists, pediatricians, and speech therapists, to address both the immediate respiratory concerns and any long-term implications for feeding and development.  Overall, early diagnosis and prompt surgical intervention are crucial for improving outcomes in infants with choanal atresia. | Consistent | 2 | 2 | 2 |
| 1. What is nasal dermoid? | A nasal dermoid is a type of congenital (present at birth) cyst or tumor that develops in the nasal area. It arises from remnants of embryonic tissue that fail to properly fuse during fetal development. These growths typically contain skin, hair follicles, and occasionally other tissues such as sweat glands or sebaceous glands.  Nasal dermoids can vary in size and presentation. They may appear as small lumps under the skin or as larger masses that protrude from the nasal area. In some cases, they may cause nasal obstruction or other symptoms depending on their size and location.  Surgical removal is usually recommended to prevent complications such as infection or interference with breathing. The prognosis for individuals with nasal dermoids is generally good with appropriate treatment. | Consistent | 1 | 2 | 2 |
| 1. What are the examinations that should be performed especially in nasal dermoid? | Nasal dermoid cysts are congenital anomalies that arise from embryonic remnants. They are typically benign but may pose risks such as infection or expansion, especially if left untreated. Diagnosis and management of nasal dermoid cysts involve a combination of clinical assessment, imaging studies, and possibly surgical intervention. Here are the examinations commonly performed:  1. **Physical Examination**: A thorough examination of the nasal area and surrounding structures is essential. Nasal dermoid cysts may present as midline nasal masses that are typically firm and non-tender.  2. **Imaging Studies**:  - **Ultrasound**: Ultrasound imaging can help in identifying the characteristics of the cystic mass, its size, and its relationship to surrounding structures. However, it may not provide as detailed information as other imaging modalities.  - **CT Scan (Computed Tomography)**: CT scan offers detailed images of the nasal region, helping to evaluate the extent of the cyst, its relationship with adjacent structures, and whether there are any signs of infection or inflammation.  - **MRI (Magnetic Resonance Imaging)**: MRI provides excellent soft tissue contrast and is particularly useful for evaluating the involvement of critical structures like the brain, meninges, or major blood vessels. It can also help in preoperative planning by delineating the cyst and its relationship with surrounding tissues more accurately.  3. **Laboratory Tests**: Blood tests such as complete blood count (CBC) and inflammatory markers may be performed to assess for signs of infection or inflammation, which can be associated with nasal dermoid cysts.  4. **Fine Needle Aspiration (FNA)**: In some cases, a fine needle aspiration biopsy may be performed to obtain a sample of the cyst's contents for analysis, especially if there are concerns about malignancy.  5. **Histopathological Examination**: Once the cyst is surgically excised, the tissue is sent for histopathological examination to confirm the diagnosis and rule out any malignant transformation.  6. **Ophthalmological Examination**: In cases where the cyst extends into the nasal bridge or forehead, an ophthalmological examination may be warranted to assess for any potential involvement or pressure on the eye or surrounding structures.  7. **Neurological Evaluation**: If there are concerns about the cyst's proximity to the brain or its potential to cause neurological symptoms, a neurological evaluation may be necessary to assess any neurological deficits and plan appropriate management.  The exact examinations performed may vary depending on the specific characteristics of the nasal dermoid cyst and individual patient factors. Treatment typically involves surgical excision to prevent complications and achieve optimal outcomes. | Consistent | 1 | 2 | 2 |
| 1. What are the syndromes associated with choanal atresia? | Choanal atresia is a congenital condition characterized by the blockage or closure of the choanae, which are the openings between the nasal passages and the throat. It can occur unilaterally (affecting one side) or bilaterally (affecting both sides). While choanal atresia can occur as an isolated anomaly, it is also associated with several syndromes. Some of the syndromes associated with choanal atresia include:  1. CHARGE syndrome: This is a complex genetic disorder that affects multiple organ systems. The acronym CHARGE stands for coloboma of the eye, heart defects, atresia choanae, retarded growth and development, genital abnormalities, and ear abnormalities.  2. Treacher Collins syndrome (also known as mandibulofacial dysostosis): This syndrome is characterized by craniofacial abnormalities, including underdeveloped facial bones, downward slanting eyes, and micrognathia (small lower jaw).  3. Crouzon syndrome: This syndrome is characterized by premature fusion of certain skull bones, leading to craniofacial abnormalities such as a prominent forehead, wide-set eyes, and a beaked nose.  4. Pfeiffer syndrome: This syndrome is also characterized by craniosynostosis (premature fusion of skull bones) along with other features like broad thumbs and toes, and partial syndactyly (webbing) of the fingers and toes.  5. Fetal alcohol syndrome: Exposure to alcohol during pregnancy can lead to a range of developmental abnormalities, including choanal atresia.  It's important to note that not all cases of choanal atresia are associated with a syndrome, and the presence of choanal atresia may vary in severity among individuals with these syndromes. Early diagnosis and appropriate management are crucial for individuals with choanal atresia, particularly those with associated syndromes, to address potential respiratory and feeding difficulties. | Consistent | 1 | 1 | 1 |
| 1. What is the frequency of nasal encephalocele? And what are their types? | Nasal encephalocele is a rare condition characterized by protrusion of brain tissue through a defect in the skull and into the nasal cavity. The frequency of nasal encephalocele is estimated to be around 1 in 5,000 to 10,000 live births.  There are several types of nasal encephalocele, including:  1. Anterior Nasal Encephalocele: This type protrudes through the front of the skull and appears as a mass in the nasal region.    2. Basal or Basilar Encephalocele: This type involves protrusion through the base of the skull and may manifest as a mass in the nasal region or may extend into the nasal cavity, mouth, or throat.  3. Transethmoidal Encephalocele: This type protrudes through the ethmoid bone, often presenting as a mass in the nasal cavity.  4. Transsphenoidal Encephalocele: This type involves protrusion through the sphenoid bone, typically appearing as a mass in the nasal cavity or nasopharynx.  Each type of encephalocele may have its own associated symptoms and complications, and management typically involves surgical intervention to repair the skull defect and reposition the brain tissue. | Consistent | 1 | 1 | 1 |
| 1. Which sinuses are present at birth? | At birth, the following sinuses are typically present:  1. **Maxillary Sinuses**: These are present at birth but are relatively small and underdeveloped. They continue to develop as the child grows.  2. **Ethmoid Sinuses**: The ethmoid sinuses are present at birth as well. They are a collection of air cells located between the eyes, behind the nasal bones.  3. **Sphenoid Sinuses**: These sinuses are also present at birth, but like the maxillary sinuses, they are small and not fully developed.  The frontal sinuses, located in the forehead, are generally absent or very small at birth. They develop later in childhood and usually don't fully develop until the late teens or early adulthood. | Consistent | 1 | 3 | 2 |
| 1. What is the frequency of cleft lip? | The frequency of cleft lip varies among populations and geographical regions. However, globally, cleft lip occurs in approximately 1 in every 700 births. The prevalence might be slightly higher or lower depending on factors such as ethnicity, genetics, environmental influences, and access to healthcare. Cleft lip can occur alone or in combination with cleft palate, and the frequency might differ between isolated cleft lip cases and cleft lip with cleft palate. It's essential to note that these figures may vary over time and across different populations due to various factors. | Consistent | 1 | 1 | 1 |
| 1. What are the nasal anomalies seen in cleft lip patients? | Cleft lip, a congenital condition where there is a split or gap in the upper lip, often presents with various nasal anomalies due to the structural abnormalities associated with the condition. Some of the nasal anomalies commonly seen in cleft lip patients include:  1. **Nasal asymmetry**: Due to the cleft affecting the lip and sometimes the nasal cartilage, there can be asymmetry in the nostrils and nasal structures.  2. **Deviated septum**: The septum, the thin wall of cartilage and bone that separates the nostrils, may be deviated or displaced from its normal position, leading to breathing difficulties.  3. **Alar base asymmetry**: The base of the nose (the alar base) may be asymmetrical, contributing to an uneven appearance of the nostrils.  4. **Alar cartilage malformation**: The cartilage that shapes the nostrils (alar cartilage) may be malformed or improperly positioned, leading to distortion in the shape of the nose.  5. **Columellar deviation**: The columella, the strip of tissue between the nostrils, may be deviated or displaced, leading to a crooked appearance of the nasal tip.  6. **Nasal tip deformity**: The nasal tip may be flattened, bulbous, or asymmetric due to the underlying structural abnormalities.  7. **Nasal airway obstruction**: Structural abnormalities associated with cleft lip can contribute to nasal airway obstruction, affecting breathing and potentially leading to issues like snoring or sleep apnea.  These nasal anomalies can vary in severity among cleft lip patients and may require surgical intervention as part of comprehensive cleft lip and palate treatment to improve both aesthetic appearance and nasal function. | Consistent | 1 | 1 | 1 |
| Sinosasal tumors |  |  |  |  |  |
| 1. What is the most common benign sinonasal tumor? | The most common benign sinonasal tumor is the nasal polyp. Nasal polyps are noncancerous growths that develop in the lining of the nasal passages or sinuses. They are often associated with inflammation, such as that seen in conditions like chronic rhinosinusitis or allergies. While nasal polyps are generally harmless, they can cause symptoms like nasal congestion, runny nose, facial pain or pressure, and reduced sense of smell. Treatment typically involves medications to reduce inflammation or, in some cases, surgical removal. | Consistent | 1 | 1 | 1 |
| 1. Are there any viral pathogens associated with sinonasal tumors? | Yes, viral pathogens have been associated with sinonasal tumors. One notable example is the human papillomavirus (HPV), particularly HPV types 16 and 18. HPV infection has been linked to the development of sinonasal squamous cell carcinoma (SNSCC), a type of cancer that affects the mucosal lining of the nasal cavity and paranasal sinuses. Studies have found evidence of HPV DNA in a significant proportion of SNSCC cases, suggesting a potential role of HPV in the pathogenesis of these tumors.  Additionally, Epstein-Barr virus (EBV) has also been implicated in certain types of sinonasal tumors, such as sinonasal undifferentiated carcinoma (SNUC). EBV is a herpesvirus known to be associated with various malignancies, including nasopharyngeal carcinoma and certain lymphomas. In SNUC cases, EBV DNA and viral gene products have been detected in tumor tissues, suggesting a possible role of EBV in the development of these tumors.  While viral infections are not the sole cause of sinonasal tumors, their association with certain types of tumors highlights the importance of viral factors in the pathogenesis of these malignancies. | Consistent | 1 | 1 | 1 |
| 1. What are the ages when Juvenile nasopharyngeal angiofibroma (JNA) is most common? | Juvenile nasopharyngeal angiofibroma (JNA) is a rare but well-known benign tumor that typically occurs in adolescent males. The age range when JNA is most common is usually between 10 and 19 years old. It rarely occurs before puberty or after the age of 25. This age group is characterized by the hormonal changes associated with puberty, which is believed to play a role in the development of these tumors. However, it's important to note that JNA can occur outside of this age range, but it's less common. | Consistent | 1 | 1 | 1 |
| 1. Is there gender predominance in JNA? | Yes, there is a gender predominance in juvenile nasopharyngeal angiofibroma (JNA). It almost exclusively affects males, with the vast majority of cases occurring in adolescent males. This gender predominance is believed to be related to hormonal factors, particularly the influence of androgens (male hormones), which play a role in the growth and development of these tumors. As a result, JNA is extremely rare in females. | Consistent | 1 | 1 | 1 |
| 1. What are the radiological characteristics of JNA? | The radiological characteristics of juvenile nasopharyngeal angiofibroma (JNA) can vary, but there are several common findings that can aid in its diagnosis. These characteristics are typically observed on imaging studies such as CT (computed tomography) scans and MRI (magnetic resonance imaging) scans. Some of the radiological features of JNA include:  1. **Location**: JNA typically arises from the posterolateral wall of the nasopharynx, close to the sphenopalatine foramen. It can extend into adjacent structures such as the nasal cavity, paranasal sinuses, and cranial fossa.  2. **Enhancement**: On contrast-enhanced imaging studies, JNA often shows avid enhancement due to its hypervascularity. This intense enhancement is characteristic of the tumor's highly vascular nature.  3. **Bone Erosion**: JNA can cause erosion or remodeling of adjacent bone structures, particularly those of the sphenoid and ethmoid sinuses, as well as the skull base. This can be visualized as areas of bone destruction or sclerosis on imaging.  4. **Extension**: JNA may extend into surrounding structures such as the nasal cavity, paranasal sinuses, pterygopalatine fossa, and intracranial space. Imaging helps delineate the extent of tumor involvement.  5. **Invasion**: In advanced cases, JNA can invade nearby structures such as the cavernous sinus, orbit, and cranial nerves. Imaging can help assess the degree of invasion and involvement of critical structures.  6. **Vascularization**: On angiography, JNA typically shows intense vascularity with prominent arterial feeders, often arising from branches of the external carotid artery. This can aid in preoperative planning and embolization.  Overall, radiological imaging plays a crucial role in the diagnosis, staging, and surgical planning of juvenile nasopharyngeal angiofibroma, providing valuable information about the tumor's location, extent, and vascular supply. | Consistent | 1 | 3 | 3 |
| 1. What is the most common malignant sinonasal tumor? | The most common malignant sinonasal tumor is squamous cell carcinoma. Squamous cell carcinoma arises from the squamous cells lining the mucosa of the sinonasal tract. It accounts for the majority of malignant tumors in this region. Other less common malignant sinonasal tumors include adenocarcinoma, adenoid cystic carcinoma, and sinonasal undifferentiated carcinoma. | Consistent | 1 | 1 | 1 |
| 1. What is the treatment of choice and rationals of it in inverted papillomas? | The treatment of choice for inverted papillomas, which are benign tumors of the nasal cavity and paranasal sinuses, is surgical resection. The rationale behind surgical removal is to completely excise the tumor to prevent recurrence and to evaluate for any potential malignant transformation.  Endoscopic sinus surgery is typically the preferred approach for resection, as it allows for precise visualization and removal of the tumor while minimizing trauma to surrounding tissues. This approach has been shown to have favorable outcomes with low recurrence rates.  In cases where the inverted papilloma has caused significant bony erosion or involvement of adjacent structures, a more extensive surgical approach may be necessary, such as a craniofacial resection.  Regular follow-up examinations are often recommended postoperatively to monitor for any signs of recurrence, as these tumors have the potential to regrow, particularly if any tumor remnants were left behind during the initial surgery. | Consistent | 1 | 1 | 1 |
| 1. What is the most common malignancy that develops on the basis of inverted papilloma? | The most common malignancy that can develop on the basis of an inverted papilloma is squamous cell carcinoma. Inverted papillomas are benign growths, but in some cases, they can undergo malignant transformation into squamous cell carcinoma. This transformation typically occurs in a small percentage of cases. Regular monitoring and follow-up are important for patients diagnosed with inverted papillomas to detect any potential malignant changes early. | Consistent | 1 | 1 | 1 |
| 1. What are the JNA staging systems? | The JNA (Jugular foramen nerve sheath angiofibromas) staging system is a classification used to assess the severity and extent of jugular foramen nerve sheath angiofibromas, a type of tumor that occurs in the skull base. These tumors typically arise from the jugular foramen, a small opening at the base of the skull through which several important nerves and blood vessels pass.  The JNA staging system helps clinicians in determining the appropriate treatment approach and predicting prognosis based on the size and extent of the tumor. There are various staging systems proposed by different researchers, but one commonly used system is the one proposed by Fisch et al. This system categorizes JNA into four stages:  1. Stage I: Tumor confined to the nasopharynx without bone destruction.  2. Stage II: Tumor extends into the pterygomaxillary fossa.  3. Stage III: Tumor extends into the infratemporal fossa and/or orbit without intracranial extension.  4. Stage IV: Tumor extends intracranially.  These stages help in determining the appropriate surgical approach and adjunctive therapies for the management of JNA. Treatment options may include surgery, radiation therapy, and/or chemotherapy, depending on the stage of the tumor and individual patient factors. | Consistent | 2 | 1 | 1 |
| 1. Where is the most common source of JNA? | The most common source of JNA (Jugular Foramen Nerve Sheath Angiofibroma) is the region of the sphenopalatine foramen, which is located within the nasal cavity. This is where these tumors originate, typically arising from the posterolateral wall of the nasal cavity near the sphenopalatine foramen. From this origin point, they can extend into adjacent structures of the skull base, such as the pterygomaxillary fossa, infratemporal fossa, and ultimately, the jugular foramen. | Consistent | 3 | 3 | 3 |
| 1. What are the theories of antrochoanal polyp formation? | **Antrochoanal polyps (ACPs)** are benign, solitary polyps that arise from the maxillary sinus and extend into the nasal cavity and choana. Although the exact cause of their formation is not fully understood, several theories have been proposed to explain their development. Below are the key theories:  ---  ### 1. **Mechanical Obstruction Theory**  - **Description**: This theory suggests that obstruction of the sinus ostium (the opening that connects the sinus to the nasal cavity) leads to fluid accumulation and subsequent mucosal edema, resulting in polyp formation.  - **Supporting Evidence**: Chronic sinus infections or anatomical variations (like a deviated nasal septum) may obstruct the sinus drainage pathways, leading to inflammation.  ---  ### 2. **Allergic Theory**  - **Description**: This theory proposes that chronic allergic inflammation in the maxillary sinus plays a role in polyp formation.  - **Supporting Evidence**: Although allergic rhinitis has been implicated in the development of nasal polyps, there is limited evidence directly linking ACPs to allergies. In fact, many ACP patients do not have a significant allergic history, making this theory controversial.  ---  ### 3. **Infectious/Inflammatory Theory**  - **Description**: Repeated or unresolved infections of the maxillary sinus (chronic rhinosinusitis) can lead to persistent inflammation, which may contribute to mucosal swelling and polyp formation.  - **Supporting Evidence**: This theory is commonly accepted, as many patients with ACPs have a history of chronic maxillary sinusitis. However, the polyp may develop independently from any identifiable infection.  ---  ### 4. **Bernoulli Effect Theory**  - **Description**: This theory is based on the **Bernoulli principle** in physics, where a decrease in air pressure across the sinus ostium leads to suction that pulls the polyp from the maxillary sinus into the nasal cavity.  - **Supporting Evidence**: The extension of ACPs from the maxillary sinus into the nasal cavity aligns with this mechanical explanation.  ---  ### 5. **Choanal Airflow Theory**  - **Description**: It is suggested that abnormal airflow dynamics, especially through the choana, may play a role in drawing the polyp from the maxillary sinus into the nasal cavity.  - **Supporting Evidence**: Though not well-established, this theory emphasizes the role of airflow in polyp development and progression.  ---  ### 6. **Mucosal Metaplasia Theory**  - **Description**: This theory proposes that chronic irritation or inflammation leads to changes in the normal epithelium (metaplasia), promoting the growth of a polyp.  - **Supporting Evidence**: Some studies suggest mucosal changes in the maxillary sinus lining could predispose patients to polyp development.  ---  ### **Summary**  The formation of antrochoanal polyps is likely multifactorial, with contributions from mechanical, infectious, inflammatory, and possibly allergic processes. The **infectious/inflammatory theory** is the most widely accepted, but other factors such as airflow dynamics and sinus drainage obstruction also play significant roles. Further research is needed to fully understand the pathogenesis of ACPs. | Antrochoanal polyps (ACPs) are benign growths that originate from the maxillary sinus and extend into the nasal cavity through the natural ostium of the sinus. While the exact cause of ACP formation is not fully understood, there are several theories proposed to explain their development:  1. **Obstruction Theory**: This theory suggests that ACPs form due to obstruction of the maxillary sinus ostium. When the opening of the maxillary sinus becomes blocked, mucus produced in the sinus cannot drain properly, leading to the accumulation of fluid and subsequent formation of a polyp.  2. **Reactive Hypertrophy Theory**: According to this theory, chronic inflammation of the maxillary sinus leads to hypertrophy (increase in size) of the mucosal lining. As a result, polyps may form as an exaggerated response to this inflammation and hypertrophy.  3. **Developmental Theory**: Some researchers propose that ACPs may arise from remnants of the Schneiderian membrane, which is the lining of the sinuses and nasal cavity. These remnants could proliferate and form polyps under certain conditions.  4. **Allergic Theory**: Allergic reactions are known to cause inflammation and swelling of the nasal mucosa. Some studies suggest that allergic reactions may contribute to the development of ACPs by inducing chronic inflammation in the sinus mucosa, leading to polyp formation.  5. **Microbial Theory**: Chronic bacterial or fungal infections of the sinus may contribute to the development of ACPs. Microbial colonization can cause persistent inflammation and mucosal hypertrophy, which may ultimately lead to the formation of polyps.  6. **Mechanical Irritation Theory**: This theory suggests that mechanical irritation or trauma to the sinus mucosa may trigger an inflammatory response, leading to the formation of polyps. Factors such as nasal surgery, foreign bodies, or even chronic nasal packing could potentially induce this irritation.  7. **Genetic Predisposition**: There is evidence to suggest that genetic factors may predispose individuals to developing ACPs. Certain genetic abnormalities or variations in immune response genes could increase susceptibility to chronic sinus inflammation and polyp formation.  Overall, the exact etiology of ACPs is likely multifactorial, involving a combination of genetic predisposition, chronic inflammation, mucosal hypertrophy, and other contributing factors. Further research is needed to fully elucidate the underlying mechanisms of ACP formation. | 1 | 1 | 1---2 |
| 1. What are the radiological findings that should be considered in the differential diagnosis of osseofibrous lesions seen in the sinonasal cavity? | Osseofibrous lesions in the sinonasal cavity can present with various radiological findings that help in the differential diagnosis. Here are some key radiological findings to consider:  1. **Location and Extent**: The location and extent of the lesion within the sinonasal cavity can provide important clues. Lesions may involve the nasal cavity, paranasal sinuses (such as maxillary, ethmoid, sphenoid, or frontal sinuses), or adjacent structures.  2. **Bone Involvement**: Assessment of bone involvement is crucial. Radiographic features such as bone erosion, sclerosis, cortical thickening, or destruction can indicate the extent and aggressiveness of the lesion. Osseous expansion or destruction may be seen depending on the nature of the lesion.  3. **Soft Tissue Component**: Evaluation of soft tissue involvement is important. Soft tissue masses or density within the sinonasal cavity, with or without associated bony changes, can indicate the presence of a lesion.  4. **Calcifications**: Presence of calcifications within the lesion can provide important diagnostic information. Calcifications may be punctate, stippled, or coarse, and their distribution pattern can aid in narrowing down the differential diagnosis.  5. **Margins and Borders**: Assessment of lesion margins and borders is essential. Well-defined margins may suggest a benign lesion, while ill-defined or infiltrative margins may indicate a more aggressive process such as malignancy.  6. **Internal Structure**: Examination of internal structure can reveal characteristic features of specific lesions. For example, fibrous or cystic components may be present in some lesions, while others may demonstrate solid or heterogeneous enhancement patterns.  7. **Presence of Air-fluid Levels**: Presence of air-fluid levels within the lesion or adjacent sinuses may indicate associated inflammation, infection, or fluid accumulation.  8. **Enhancement Patterns**: Enhancement patterns on contrast-enhanced imaging studies can provide additional diagnostic information. Patterns such as homogeneous enhancement, peripheral enhancement, or heterogeneous enhancement can help differentiate various lesions.  9. **Adjacent Soft Tissue Involvement**: Assessment for involvement of adjacent soft tissues, such as the nasal septum, nasal turbinates, or orbit, can aid in narrowing down the differential diagnosis and assessing the extent of the lesion.  10. **Vascularization**: Evaluation of vascularization within the lesion, demonstrated by features such as hypervascularity or vascular encasement, can provide valuable diagnostic clues.  11. **Pattern of Growth**: Assessment of the pattern of growth, such as expansile versus infiltrative growth, can provide important diagnostic information and aid in the formulation of a differential diagnosis.  By considering these radiological findings in conjunction with clinical history and other relevant data, a comprehensive differential diagnosis of osseofibrous lesions in the sinonasal cavity can be formulated, leading to appropriate management and treatment planning. However, it's important to note that definitive diagnosis often requires histopathological examination. | Consistent | 1 | 2 | 2 |
| 1. What is the treatment of choice for fibrous dyplasia? What are the indications of surgery in patients with fibrous dyplasia? | The treatment of choice for fibrous dysplasia depends on various factors including the severity of symptoms, the extent of bone involvement, and the patient's overall health condition. In many cases, especially if the condition is mild or asymptomatic, observation and monitoring may be sufficient without the need for specific treatment. However, when treatment is necessary, it typically involves a combination of medical management and surgical intervention.  1. **Medical Management**:  - Medications: Nonsteroidal anti-inflammatory drugs (NSAIDs) may be prescribed to help manage pain and inflammation associated with fibrous dysplasia.  - Bisphosphonates: These drugs may be used to help strengthen bone and reduce bone turnover, which can be beneficial in managing symptoms and preventing complications such as fractures.  2. **Surgical Intervention**:  - Surgery may be indicated in certain cases of fibrous dysplasia, especially when the condition is causing significant symptoms, complications, or functional impairment. Indications for surgery may include:  - Severe pain that is unresponsive to medical management.  - Pathological fractures (fractures occurring in weakened bone).  - Progressive deformity or functional impairment affecting mobility or vital structures.  - Presence of complications such as nerve compression or vascular compromise.  - Surgical procedures for fibrous dysplasia may include:  - Curettage: Removal of the affected bone tissue, followed by bone grafting to fill the defect and promote healing.  - Osteotomy: Surgical cutting and repositioning of bone to correct deformities or restore function.  - Stabilization: Internal fixation with plates, screws, or rods may be necessary to stabilize fractures or prevent further bone deformity.  It's important for individuals with fibrous dysplasia to undergo regular follow-up appointments with healthcare providers to monitor the condition, assess symptoms, and determine the need for any adjustments in treatment. The management approach should be individualized based on the specific characteristics and needs of each patient. | Consistent | 1 | 1 | 1 |
| 1. In a patient with multiple osteomas, what syndrome is most likely to be considered? What other findings should the patient be investigated for? | In a patient presenting with multiple osteomas, one syndrome that should be considered is Gardner syndrome, which is a subtype of familial adenomatous polyposis (FAP). Gardner syndrome is characterized by the presence of multiple colorectal polyps, osteomas (benign bone tumors), soft tissue tumors (such as desmoid tumors), and various other abnormalities.  In addition to osteomas, patients with Gardner syndrome may exhibit the following findings and should be investigated for:  1. **Colorectal Polyps:** Gardner syndrome typically involves the development of hundreds to thousands of adenomatous polyps in the colon and rectum. These polyps can lead to an increased risk of colorectal cancer if not properly managed.  2. **Soft Tissue Tumors (Desmoid Tumors):** Desmoid tumors are benign, but locally aggressive, soft tissue tumors that can occur in various parts of the body, particularly in the abdomen. They can cause pain, obstruction, or other symptoms depending on their location and size.  3. **Epidermoid Cysts:** These cysts, which are benign growths filled with keratin, can develop in the skin and other parts of the body.  4. **Congenital Hypertrophy of the Retinal Pigment Epithelium (CHRPE):** CHRPE is a benign pigmented lesion of the retina that is commonly seen in patients with FAP/Gardner syndrome. It can be detected during routine eye examination.  5. **Dental Abnormalities:** Patients with Gardner syndrome may have various dental abnormalities, including supernumerary teeth, impacted teeth, and odontomas (benign tumors of dental tissue).  6. **Other Extracolonic Manifestations:** Gardner syndrome can also be associated with other extracolonic manifestations such as sebaceous cysts, fibromas, and congenital hypertrophy of the gastric mucosa (also known as fundic gland polyps).  It's important for patients presenting with multiple osteomas to undergo a thorough evaluation by a healthcare provider, including genetic counseling and testing if familial adenomatous polyposis is suspected. Regular surveillance and management of associated manifestations are essential to prevent complications such as colorectal cancer. | Consistent | 1 | 1 | 1 |
| Noninfectious rhinitis |  |  |  |  |  |
| 1. What is allergic rhinitis? What are its subtypes? | Allergic rhinitis, commonly known as hay fever, is a type of inflammation in the nasal passages caused by an allergic reaction to airborne substances. These substances, known as allergens, can include pollen, dust mites, pet dander, and mold spores. When a person with allergic rhinitis comes into contact with these allergens, their immune system overreacts, releasing histamines and other chemicals that cause symptoms such as sneezing, runny or stuffy nose, itching, and watery eyes.  There are two main subtypes of allergic rhinitis:  1. Seasonal allergic rhinitis: This type of allergic rhinitis occurs seasonally, typically triggered by specific allergens that are present at certain times of the year. For example, pollen from trees, grasses, or weeds can trigger symptoms in the spring, summer, or fall, depending on the plant's flowering season.  2. Perennial allergic rhinitis: Perennial allergic rhinitis occurs year-round and is usually triggered by indoor allergens such as dust mites, pet dander, mold, and cockroach debris. People with perennial allergic rhinitis may experience symptoms consistently throughout the year.  In addition to these subtypes, allergic rhinitis can also be classified based on the severity and frequency of symptoms, ranging from mild intermittent symptoms to severe persistent symptoms. Proper diagnosis and management of allergic rhinitis typically involve identifying the specific allergens triggering the symptoms and implementing strategies to minimize exposure, along with medications such as antihistamines, nasal corticosteroids, and allergy shots (immunotherapy) in some cases. | Consistent | 1 | 1 | 1 |
| 1. What are some of the common medical conditions that accompany allergic rhinitis? | Allergic rhinitis, commonly known as hay fever, can be associated with several medical conditions, either as comorbidities or as complications. Some of the common medical conditions that accompany allergic rhinitis include:  1. **Asthma:** Allergic rhinitis and asthma often coexist. Many people with allergic rhinitis also have asthma, and both conditions involve inflammation of the airways. Allergic rhinitis can exacerbate asthma symptoms.  2. **Sinusitis:** Allergic rhinitis can lead to inflammation and congestion in the sinuses, increasing the risk of developing sinusitis, which is an inflammation or infection of the sinuses.  3. **Nasal Polyps:** Chronic allergic rhinitis can cause nasal polyps to develop. Nasal polyps are noncancerous growths that form in the lining of the nasal passages and sinuses.  4. **Middle Ear Infections (Otitis Media):** Allergic rhinitis can cause inflammation and congestion in the Eustachian tube, which connects the middle ear to the back of the nose and throat. This congestion can increase the risk of middle ear infections.  5. **Conjunctivitis (Eye Allergy):** Allergic rhinitis can affect the eyes, leading to symptoms such as redness, itching, and watering. This condition is known as allergic conjunctivitis or eye allergy.  6. **Sleep Disturbances:** Nasal congestion and other symptoms of allergic rhinitis can interfere with sleep, leading to sleep disturbances such as insomnia or sleep apnea.  7. **Fatigue:** Chronic allergic rhinitis can cause fatigue due to disrupted sleep patterns and the body's constant effort to fight off allergens.  8. **Dental Problems:** Breathing through the mouth due to nasal congestion can lead to dry mouth, which increases the risk of dental problems such as tooth decay and gum disease.  9. **Headaches:** Nasal congestion and sinus pressure associated with allergic rhinitis can cause headaches, including sinus headaches.  10. **Decreased Quality of Life:** Allergic rhinitis can significantly impact a person's quality of life, causing discomfort, interfering with daily activities, and reducing overall well-being.  It's important for individuals with allergic rhinitis to manage their condition effectively and seek appropriate medical care to prevent or address these associated medical issues. | Consistent | 1 | 1 | 1 |
| 1. What are the subtypes of non-allergic rhinitis? | Non-allergic rhinitis refers to inflammation of the nasal passages that isn't caused by an allergic reaction. There are several subtypes of non-allergic rhinitis, which can include:  1. **Vasomotor Rhinitis**: This type is characterized by nasal congestion and a runny nose. It often occurs in response to triggers such as changes in weather, strong odors, or environmental irritants like smoke or pollution.  2. **Infectious Rhinitis**: Also known as viral rhinitis or the common cold, this subtype is caused by viral infections such as the rhinovirus. It typically involves symptoms such as a runny or stuffy nose, sneezing, sore throat, and coughing.  3. **Occupational Rhinitis**: This type occurs due to exposure to irritants or allergens in the workplace. Common triggers include dust, chemicals, fumes, or animal dander. Symptoms may resemble those of allergic rhinitis.  4. **Atrophic Rhinitis**: In this subtype, the nasal mucosa becomes thin and atrophied, leading to symptoms such as nasal crusting, dryness, and foul-smelling discharge. It can result from chronic nasal infections, certain medications, or underlying medical conditions.  5. **Hormonal Rhinitis**: This subtype is associated with hormonal changes, such as those that occur during pregnancy or hormonal fluctuations in puberty or menopause. Symptoms may include nasal congestion, runny nose, and sneezing.  6. **Medication-Induced Rhinitis**: Some medications, particularly certain blood pressure medications (such as alpha-adrenergic blockers) and oral contraceptives, can cause rhinitis as a side effect.  7. **Idiopathic Rhinitis**: When the cause of rhinitis cannot be determined despite thorough evaluation, it may be classified as idiopathic rhinitis.  It's essential to consult a healthcare professional for proper diagnosis and management of non-allergic rhinitis, as treatments may vary depending on the specific subtype and underlying cause. | Consistent | 1 | 2 | 2 |
| 1. What is vasomotor rhinitis? | Vasomotor rhinitis is a condition characterized by chronic nasal congestion, runny nose, or postnasal drip that isn't caused by allergies or infections. Unlike allergic rhinitis (hay fever), which is triggered by allergens such as pollen or pet dander, or infectious rhinitis, which is caused by viruses or bacteria, vasomotor rhinitis is often triggered by non-allergic factors such as changes in weather, temperature, humidity, strong odors, or environmental irritants like smoke or pollution.  The exact cause of vasomotor rhinitis is not fully understood, but it's believed to involve an abnormal response of the blood vessels and nerves in the nasal passages, leading to swelling and congestion. Certain factors such as hormonal changes, medications, stress, and underlying medical conditions can also contribute to the development or worsening of vasomotor rhinitis symptoms.  Treatment for vasomotor rhinitis typically focuses on managing symptoms and avoiding triggers. This may include nasal corticosteroid sprays, antihistamines, decongestants, nasal saline rinses, and avoiding known triggers. In some cases, procedures such as nasal cauterization or nerve ablation may be considered for severe or refractory cases. It's important for individuals with symptoms of chronic rhinitis to consult with a healthcare professional for proper diagnosis and management. | Consistent | 1 | 1 | 1 |
| 1. Describe the histological structure of the inferior turbinate. | The inferior turbinate, also known as the inferior nasal concha, is a bony structure located within the nasal cavity. Its histological structure consists of several layers, each contributing to its function in the respiratory system:  1. **Respiratory Epithelium (Pseudostratified Columnar Epithelium):** The inner lining of the inferior turbinate is composed of respiratory epithelium. This type of epithelium consists of pseudostratified columnar cells, including ciliated cells, goblet cells, and basal cells. These cells are specialized for the secretion of mucus and the movement of particles, debris, and pathogens out of the nasal cavity, aiding in the process of filtration and humidification of inhaled air.  2. **Lamina Propria:** Beneath the respiratory epithelium lies the lamina propria, a connective tissue layer rich in blood vessels, nerves, and seromucous glands. The lamina propria provides structural support to the epithelium and houses immune cells that help protect the nasal cavity from pathogens and foreign particles.  3. **Venous Plexus:** Within the lamina propria, there is a prominent venous plexus, which is a network of blood vessels that helps regulate blood flow and temperature within the nasal cavity. This plexus also contributes to the humidification and warming of inspired air.  4. **Submucosal Glands:** Seromucous glands are scattered throughout the lamina propria and are responsible for secreting mucus and serous fluid. This secretion helps to moisten the nasal mucosa and trap inhaled particles, facilitating their removal from the respiratory tract.  5. **Cartilaginous and Osseous Framework:** The inferior turbinate is supported by a bony and cartilaginous framework, which provides structural integrity to the nasal cavity. This framework helps maintain the patency of the nasal airway and supports the functions of the mucosal lining.  Overall, the histological structure of the inferior turbinate is adapted to its functions in humidifying, warming, filtering, and cleaning inspired air as it passes through the nasal cavity, contributing to respiratory health and comfort. | Consistent | 1 | 2 | 1 |
| 1. Give information about allergic rhinitis medical treatment. | Allergic rhinitis, commonly known as hay fever, is a condition characterized by inflammation of the nasal passages due to an allergic response. Medical treatment for allergic rhinitis aims to alleviate symptoms and reduce inflammation. Here's an overview of common treatment options:  1. **Antihistamines**: These medications block the action of histamine, a chemical released by the immune system during an allergic reaction. Antihistamines can relieve symptoms like sneezing, itching, and runny nose. They are available in various forms including oral tablets, liquid solutions, nasal sprays, and eye drops. Examples include loratadine, cetirizine, fexofenadine, and diphenhydramine.  2. **Nasal Corticosteroids**: These medications reduce inflammation in the nasal passages, thereby relieving symptoms such as nasal congestion, sneezing, and runny nose. They are typically sprayed directly into the nostrils. Nasal corticosteroids are often considered the most effective treatment for allergic rhinitis. Examples include fluticasone (Flonase), mometasone (Nasonex), budesonide (Rhinocort), and triamcinolone (Nasacort).  3. **Decongestants**: Decongestants help shrink swollen nasal tissues, reducing congestion. They are available in oral tablets, nasal sprays, and liquids. However, nasal spray decongestants should be used for short periods only, as prolonged use can lead to rebound congestion. Common decongestants include pseudoephedrine and phenylephrine.  4. **Leukotriene Receptor Antagonists**: These medications block the action of leukotrienes, substances in the body that contribute to allergic reactions and inflammation. They can be useful for treating allergic rhinitis, particularly in individuals who also have asthma. Montelukast (Singulair) is an example of a leukotriene receptor antagonist used for allergic rhinitis.  5. **Immunotherapy**: Immunotherapy, also known as allergy shots, involves administering gradually increasing doses of allergens to desensitize the immune system to specific allergens. This treatment can provide long-term relief for allergic rhinitis and is particularly helpful when symptoms are not well-controlled with other medications.  6. **Anticholinergic Nasal Sprays**: These medications can help reduce nasal discharge by blocking the action of acetylcholine, a neurotransmitter involved in nasal secretions. Ipratropium bromide nasal spray (Atrovent) is an example of an anticholinergic medication used to treat allergic rhinitis.  7. **Mast Cell Stabilizers**: Mast cell stabilizers prevent the release of histamine and other inflammatory substances from mast cells, thereby reducing allergic reactions. They are available in nasal spray form and can help alleviate symptoms such as itching, sneezing, and runny nose. Cromolyn sodium (Nasalcrom) is a common mast cell stabilizer used for allergic rhinitis.  It's important to consult a healthcare professional before starting any treatment for allergic rhinitis, as they can provide personalized recommendations based on the severity of symptoms, medical history, and potential drug interactions. Additionally, avoiding allergens whenever possible can complement medical treatment and help reduce symptoms. | Consistent | 1 | 1 | 1 |
| 1. Is there a surgical treatment option for allergic rhinitis? | Surgical treatment for allergic rhinitis is generally considered a last resort and is typically reserved for cases where other treatments have failed to provide relief or in situations where there are structural abnormalities contributing to symptoms. Surgical options for allergic rhinitis may include:  1. **Septoplasty**: This surgical procedure is performed to correct a deviated septum, which is a common structural issue that can contribute to nasal congestion and difficulty breathing. By straightening the septum, airflow through the nasal passages can be improved, potentially reducing symptoms of allergic rhinitis.  2. **Turbinoplasty or Turbinectomy**: Turbinates are structures inside the nose that help regulate airflow and humidity. In some cases of allergic rhinitis, the turbinates may become swollen and contribute to nasal congestion. Turbinoplasty or turbinectomy involves reducing the size of the turbinates to improve nasal airflow and alleviate congestion.  3. **Sinus Surgery**: Chronic allergic rhinitis can sometimes lead to complications such as sinusitis, in which the sinuses become inflamed and infected. In cases where medical treatments fail to resolve chronic sinusitis associated with allergic rhinitis, sinus surgery may be considered. This surgery aims to remove blockages, improve drainage, and reduce inflammation in the sinuses.  4. **Nasal Polypectomy**: Nasal polyps are noncancerous growths that can develop in the nasal passages and sinuses, often as a result of chronic inflammation from conditions like allergic rhinitis. When nasal polyps contribute to symptoms such as nasal congestion and difficulty breathing, surgical removal (polypectomy) may be necessary.  5. **Balloon Sinuplasty**: This minimally invasive procedure is used to treat chronic sinusitis by widening the sinus openings and improving drainage. While it is not specifically a treatment for allergic rhinitis, it may be recommended in cases where sinusitis is a complication of allergic inflammation.  It's important to note that surgical treatment for allergic rhinitis is not typically curative, as it does not address the underlying allergic response. Therefore, surgery is usually considered as part of a comprehensive treatment plan that may also include medications, allergen avoidance measures, and allergy immunotherapy. Before considering surgery for allergic rhinitis, individuals should undergo a thorough evaluation by an ear, nose, and throat (ENT) specialist to determine the most appropriate course of action based on their specific symptoms and medical history. | Consistent | 1 | 2 | 2 |
| 1. What is the most common pathogen related to atrophic rhinits? What are the clinical findings of atrophic rhinits in examination? | Atrophic rhinitis is a condition characterized by thinning and degeneration of the mucous membrane lining of the nasal passages and sinuses. The most common pathogen associated with atrophic rhinitis is Klebsiella ozaenae, a type of bacteria. This bacterium is often found in cases of primary atrophic rhinitis, also known as ozena.  Clinical findings of atrophic rhinitis in examination may include:  1. Foul odor: One of the hallmark symptoms of atrophic rhinitis is a persistent foul odor emanating from the nasal passages. This is often described as a characteristic feature due to the presence of decomposing mucus and tissue.  2. Nasal crusting: Patients with atrophic rhinitis often have excessive nasal crusting due to the dried secretions and degenerated mucosa.  3. Nasal congestion: Despite the nasal passages appearing widened due to tissue loss, patients may still experience nasal congestion due to compensatory mechanisms and inflammation.  4. Nasal discharge: While nasal discharge may be present, it is typically scanty and may have a characteristic foul smell.  5. Nasal bleeding: Patients may experience intermittent nasal bleeding due to the fragile nature of the mucosa.  6. Nasal dryness: Patients often complain of dryness in the nasal passages due to decreased mucus production and the presence of crusting.  7. Nasal deformities: Prolonged atrophic rhinitis can lead to structural changes in the nasal passages, resulting in deformities such as a widened nasal cavity and nasal collapse.  These clinical findings can vary in severity depending on the stage and underlying cause of atrophic rhinitis. Diagnosis is typically made based on clinical examination findings and may be confirmed through imaging studies or microbiological culture if an infectious cause is suspected. Treatment options may include nasal irrigation, topical antibiotics, nasal moisturizers, and in severe cases, surgical intervention to correct structural abnormalities. | Consistent | 1 | 1 | 1 |
| 1. What treatment options have been shown to be useful in non-allergic rhinitis? | Non-allergic rhinitis refers to inflammation of the nasal passages that is not caused by an allergic reaction. Treatment for non-allergic rhinitis aims to alleviate symptoms and improve quality of life. Several treatment options have been shown to be useful in managing non-allergic rhinitis:  1. **Nasal corticosteroids:** These medications are often prescribed as a first-line treatment for non-allergic rhinitis. They help reduce inflammation in the nasal passages, relieving symptoms such as nasal congestion, runny nose, and sneezing.  2. **Antihistamines:** While typically used to treat allergic rhinitis, antihistamines may also provide some relief for non-allergic rhinitis, particularly if symptoms involve sneezing and itching. However, they are less effective for nasal congestion.  3. **Decongestants:** Oral or topical decongestants can help reduce nasal congestion by constricting blood vessels in the nasal passages. However, they should be used cautiously and for short durations to avoid rebound congestion and other side effects.  4. **Nasal saline irrigation:** Nasal irrigation with saline solution can help rinse away irritants, allergens, and mucus from the nasal passages, providing symptom relief for non-allergic rhinitis.  5. **Nasal anticholinergics:** These medications, such as ipratropium bromide nasal spray, can help reduce nasal secretion and improve symptoms of rhinorrhea (runny nose) in non-allergic rhinitis.  6. **Leukotriene receptor antagonists:** Montelukast, a medication typically used for asthma, has been shown to be beneficial in some cases of non-allergic rhinitis, particularly when symptoms are associated with underlying inflammation.  7. **Capsaicin nasal spray:** Capsaicin, the active component in chili peppers, can desensitize nasal nerves and reduce symptoms of non-allergic rhinitis. It may cause transient burning or irritation initially.  8. **Botulinum toxin injections:** In some cases, intranasal injections of botulinum toxin have been used to reduce nasal hypersecretion and improve symptoms of non-allergic rhinitis, particularly in cases of gustatory rhinitis (triggered by eating).  9. **Acupuncture:** Some studies suggest that acupuncture may provide symptomatic relief for non-allergic rhinitis, although further research is needed to confirm its efficacy.  10. **Environmental modifications:** Avoiding known triggers such as smoke, strong odors, pollution, and other irritants can help reduce symptoms of non-allergic rhinitis.  Treatment plans for non-allergic rhinitis should be individualized based on the specific symptoms, triggers, and underlying causes of the condition. It's essential to consult a healthcare professional for proper diagnosis and treatment recommendations. | Consistent | 1 | 1 | 1 |
| Other topics |  |  |  |  |  |
| 1. What is Samter syndrome? | Samter's syndrome, also known as aspirin-exacerbated respiratory disease (AERD), is a chronic medical condition characterized by the triad of asthma, nasal polyps, and sensitivity to aspirin (as well as other nonsteroidal anti-inflammatory drugs, or NSAIDs).  People with Samter's syndrome typically experience symptoms such as asthma exacerbations, chronic sinusitis, nasal congestion, and nasal polyps. The reaction to aspirin or NSAIDs can include worsening respiratory symptoms, such as asthma attacks, nasal congestion, and even anaphylaxis in severe cases.  Treatment often involves managing symptoms with medications like corticosteroids, leukotriene receptor antagonists, and sometimes aspirin desensitization therapy under medical supervision. In some cases, surgical intervention to remove nasal polyps may be necessary to alleviate symptoms. | Consistent | 1 | 1 | 1 |
| 1. What are the subtypes of fungal rhinosinusitis? | Fungal rhinosinusitis encompasses several subtypes, each with distinct characteristics and clinical presentations. These subtypes include:  1. **Allergic Fungal Rhinosinusitis (AFRS)**:  - AFRS is characterized by an exaggerated immune response to fungal antigens, typically from fungi such as Aspergillus species.  - Symptoms may include nasal congestion, nasal polyps, facial pain, and anosmia (loss of smell).  - Patients often have a history of asthma, nasal polyps, or atopy.  2. **Chronic Invasive Fungal Rhinosinusitis**:  - This subtype typically affects immunocompromised individuals, such as those with poorly controlled diabetes, HIV/AIDS, or those undergoing chemotherapy.  - Fungi invade the mucosal lining and underlying tissues of the sinuses, leading to chronic inflammation and tissue destruction.  - Symptoms may include nasal congestion, facial pain, fever, and headache.  3. **Acute Invasive Fungal Rhinosinusitis**:  - This is a rapidly progressing and potentially life-threatening subtype of fungal rhinosinusitis.  - It primarily affects severely immunocompromised patients, such as those undergoing bone marrow transplantation or receiving high-dose corticosteroids.  - Fungi invade the sinus mucosa and surrounding tissues, leading to tissue necrosis and possible dissemination to the brain.  - Symptoms may include severe facial pain, headache, fever, altered mental status, and signs of orbital or intracranial involvement.  4. **Granulomatous Fungal Rhinosinusitis**:  - Granulomatous fungal rhinosinusitis is characterized by the formation of granulomas in the sinuses in response to fungal infection.  - It typically occurs in immunocompetent individuals and is often associated with fungi such as Aspergillus or dematiaceous fungi.  - Symptoms may include nasal congestion, facial pain, and sometimes nasal discharge containing fungal elements.  5. **Fungus Ball (Mycetoma)**:  - Fungus balls are localized accumulations of fungal debris within the sinuses, often composed of Aspergillus species.  - This subtype typically occurs in immunocompetent individuals and is commonly associated with chronic sinusitis.  - Symptoms may include nasal congestion, facial pressure, and occasionally, bloody nasal discharge.  Each subtype of fungal rhinosinusitis requires specific diagnostic and therapeutic approaches tailored to the underlying pathology and patient characteristics. | Consistent | 1 | 1 | 1 |
| 1. How should the management of rhinocerebral mucormycosis patients be? | The management of rhinocerebral mucormycosis, a rare but serious fungal infection, typically involves a multi-disciplinary approach and may include the following components:  1. **Antifungal Therapy**: Prompt initiation of antifungal therapy is crucial. Amphotericin B is the primary antifungal agent used for the treatment of mucormycosis. Liposomal amphotericin B is often preferred due to its better safety profile compared to conventional amphotericin B. Posaconazole may also be used as an alternative or adjunctive therapy, particularly in cases of intolerance or resistance to amphotericin B.  2. **Surgical Debridement**: Surgical debridement of necrotic tissue is essential to remove the source of infection and improve the efficacy of antifungal therapy. This often involves extensive surgical intervention by otolaryngologists, neurosurgeons, or maxillofacial surgeons depending on the extent of the infection.  3. **Control of Underlying Conditions**: Rhinocerebral mucormycosis often occurs in immunocompromised individuals, such as those with uncontrolled diabetes, hematologic malignancies, or solid organ transplants. Therefore, optimal control of underlying conditions and risk factors is important.  4. **Supportive Care**: Patients with rhinocerebral mucormycosis may require supportive care measures such as intravenous fluids, electrolyte replacement, and nutritional support to maintain their overall health and aid in recovery.  5. **Close Monitoring**: Close monitoring of clinical response to treatment, including serial imaging studies and laboratory assessments, is necessary to evaluate the progression of the infection and the response to therapy.  6. **Adjunctive Therapies**: In certain cases, adjunctive therapies such as hyperbaric oxygen therapy or granulocyte colony-stimulating factor (G-CSF) may be considered to enhance tissue oxygenation or boost the immune response, respectively. However, the efficacy of these adjunctive treatments remains uncertain and requires further study.  7. **Continued Follow-up**: After completion of initial treatment, patients should undergo regular follow-up evaluations to monitor for any signs of disease recurrence or complications.  It's important to note that the management of rhinocerebral mucormycosis should be individualized based on the patient's clinical presentation, underlying conditions, and response to therapy. Early diagnosis and intervention are critical for improving patient outcomes in this potentially life-threatening infection. Therefore, a collaborative approach involving infectious disease specialists, otolaryngologists, neurosurgeons, and other relevant healthcare providers is essential for the successful management of rhinocerebral mucormycosis. | Consistent | 1 | 1 | 1 |
| 1. Describe the Chandler classification used in the complication of rhinosinusitis | Apologies for the confusion, but it seems there might be a misunderstanding. The Chandler classification is not specifically used in the complications of rhinosinusitis. Instead, it's primarily associated with categorizing glaucoma drainage devices, as I described in the previous response.  Regarding rhinosinusitis, complications may indeed be classified, but not under the Chandler classification. Complications of rhinosinusitis are often categorized based on various factors such as anatomical involvement, severity, and the progression of the disease. One commonly used classification system for complications of rhinosinusitis is the following:  1. **Local Complications**:  - **Orbital Complications**: These include orbital cellulitis, subperiosteal abscess, orbital abscess, cavernous sinus thrombosis, and optic neuritis.  - **Intracranial Complications**: Such as meningitis, brain abscess, epidural abscess, subdural empyema, and frontal lobe abscess.  2. **Systemic Complications**: These are complications that affect the entire body and may include sepsis, bacteremia, and toxic shock syndrome.  3. **Chronic Complications**: These refer to complications that arise from chronic or recurrent rhinosinusitis, such as chronic sinusitis, nasal polyps, or mucoceles.  4. **Functional Complications**: These complications may arise due to the obstruction of normal sinus drainage pathways and can include conditions like sinus headache, facial pain, and impaired sense of smell.  5. **Other Complications**: This category may include uncommon complications or those that do not fit into the above categories, such as vocal cord paralysis due to recurrent laryngeal nerve involvement.  It's essential for healthcare providers to be familiar with the various complications associated with rhinosinusitis to promptly recognize and manage them to prevent serious sequelae. However, the Chandler classification is not a part of this classification system. | Consistent | 4 | 4 | 4 |
| 1. What is mucocele? In which sinuses is it most common? | A mucocele is a benign, mucus-filled cyst that commonly occurs in the paranasal sinuses. These cysts form when the drainage pathways of the sinuses become blocked, leading to an accumulation of mucus and subsequent cyst formation.  Mucoceles can occur in any of the paranasal sinuses, but they are most commonly found in the frontal and ethmoid sinuses. The frontal sinuses are located in the forehead region, while the ethmoid sinuses are situated between the eyes. These sinuses are particularly prone to blockages due to their complex anatomy and proximity to the nasal passages.  When a mucocele develops, it can cause symptoms such as facial pressure, headache, nasal congestion, and sometimes pain. Treatment typically involves surgical drainage or removal of the cyst to alleviate symptoms and prevent recurrence. | Consistent | 1 | 1 | 1 |
| 1. In which paranasal sinuses is osteoma most commonly seen? | Osteomas are benign bone tumors that can occur in various locations in the body, including the paranasal sinuses. The paranasal sinuses where osteomas are most commonly seen include the frontal sinus and the ethmoid sinus. These tumors can also occasionally occur in the maxillary sinus and sphenoid sinus, but they are less common in these locations. | Consistent | 1 | 1 | 1 |
| 1. What is Pott puffy tumor? Describe its pathophysiology. | Pott's puffy tumor is a rare but serious complication of frontal sinusitis characterized by a subperiosteal abscess formation in the frontal bone, leading to swelling and edema of the forehead. It is named after Sir Percivall Pott, a famous English surgeon who first described it in the 18th century.  The pathophysiology of Pott's puffy tumor involves the following steps:  1. **Frontal Sinusitis**: The condition typically begins with an infection of the frontal sinus, which is located behind the forehead. This infection is often caused by bacteria, most commonly Streptococcus pneumoniae, Haemophilus influenzae, or Staphylococcus aureus.  2. **Obstruction and Accumulation**: Inflammation of the sinus lining, often due to viral upper respiratory infections or allergies, can lead to obstruction of the frontal sinus drainage pathways. This obstruction prevents proper drainage of mucus, leading to the accumulation of secretions within the sinus cavity.  3. **Bacterial Growth and Abscess Formation**: The stagnant mucus within the frontal sinus creates an ideal environment for bacterial growth. Bacteria proliferate within the sinus cavity, leading to the formation of pus. As the infection progresses, the pressure within the sinus cavity increases.  4. **Periosteal Erosion and Subperiosteal Abscess**: The increased pressure within the frontal sinus can cause erosion of the thin bone separating the sinus from the outer surface of the forehead (periosteum). Pus then dissects its way through the periosteum, forming a subperiosteal abscess between the bone and the periosteum.  5. **Clinical Presentation**: The swelling associated with the subperiosteal abscess manifests as a tender, fluctuant mass on the forehead, typically accompanied by symptoms of frontal sinusitis such as headache, fever, nasal congestion, and purulent nasal discharge.  6. **Complications**: If left untreated, the infection can spread beyond the frontal bone and periosteum, leading to serious complications such as intracranial abscess, meningitis, or brain abscess.  Treatment of Pott's puffy tumor usually involves a combination of antibiotic therapy to eradicate the underlying infection and surgical drainage of the abscess to relieve pressure and prevent further complications. Prompt diagnosis and management are essential to prevent severe sequelae and ensure a favorable outcome. | Consistent | 1 | 1 | 1 |
| 1. Which sinus disease is the most common cause of preseptal cellulitis? | The most common sinus disease that can lead to preseptal cellulitis is sinusitis, particularly when it involves the ethmoid sinus. The ethmoid sinus is located near the medial canthus of the eye, and its proximity to the orbit makes it a common source of infection that can spread to the soft tissues around the eye, causing preseptal cellulitis. | Consistent | 1 | 1 | 1 |
| 1. In which sinuses are fungus balls seen most often? | Fungus balls, also known as mycetomas or fungal sinusitis, are most commonly seen in the paranasal sinuses, particularly the maxillary sinus. However, they can also occur in other sinuses such as the sphenoid sinus and less frequently in the frontal sinus and ethmoid sinus. | Consistent | 1 | 1 | 1 |
| 1. What are the diagnostic criteria for Allergic fungal rhinosinusitis? | Allergic fungal rhinosinusitis (AFRS) is a condition characterized by an allergic reaction to fungal elements within the sinuses. The diagnosis of AFRS involves a combination of clinical symptoms, imaging studies, and histopathological findings. Here are the diagnostic criteria for AFRS:  1. **Clinical Symptoms**:  - Symptoms typically include nasal congestion, nasal discharge (which may be thick and discolored), facial pain or pressure, anosmia (loss of smell), and headaches.  - Patients may also experience symptoms of allergic rhinitis such as sneezing, itching, and watery eyes.  - Symptoms often persist despite conventional medical therapy, including antibiotics and steroids.  2. **Radiological Findings**:  - Imaging studies such as computed tomography (CT) scans of the sinuses often reveal characteristic findings, including unilateral or bilateral opacification of the paranasal sinuses with hyperdense material (usually described as "peanut butter-like" or "mucin").  - Other common findings include nasal polyps, sinus mucosal thickening, and bony erosion.  3. **Allergy Testing**:  - Allergy testing may reveal sensitivity to fungal antigens, although this is not always present.  - Skin prick tests or specific IgE blood tests can be performed to assess for sensitivity to common fungi found in AFRS.  4. **Histopathological Examination**:  - Histopathological examination of sinus tissue obtained during surgery is often necessary for definitive diagnosis.  - Histological findings typically include eosinophilic mucin containing fungal hyphae and inflammatory cells, such as eosinophils, Charcot-Leyden crystals, and non-invasive fungal elements.  - Invasive fungal elements or tissue invasion are absent, distinguishing AFRS from invasive fungal sinusitis.  5. **Clinical Course**:  - AFRS often demonstrates a chronic and relapsing course if left untreated.  - Response to appropriate treatment, which typically includes surgical debridement and long-term corticosteroid therapy, can further support the diagnosis.  It's important to note that the diagnosis of AFRS requires a multidisciplinary approach involving otolaryngologists, allergists, and radiologists. Additionally, other conditions such as chronic rhinosinusitis with nasal polyps and invasive fungal sinusitis should be considered in the differential diagnosis and appropriately ruled out. | Consistent | 2 | 1 | 1 |
| 1. What are the tests that should be performed in case of suspicion of CSF rhinorrhea? | Cerebrospinal fluid (CSF) rhinorrhea occurs when there is a leakage of cerebrospinal fluid from the cranial cavity into the nasal passages. When there is a suspicion of CSF rhinorrhea, several tests can be performed to confirm the diagnosis and locate the site of the leakage. These tests may include:  1. **Clinical Evaluation**: A thorough medical history and physical examination are essential. The presence of clear, watery nasal discharge, especially when it is unilateral and continuous, can be indicative of CSF rhinorrhea.  2. **Beta-2 Transferrin Assay**: This is a highly specific test for detecting CSF in nasal or ear discharge. Beta-2 transferrin is a protein found in high concentrations in CSF but is not present in other body fluids such as serum or nasal mucus.  3. **Glucose Test**: CSF contains glucose, so testing the fluid from the nasal discharge for glucose can help differentiate it from other types of nasal discharge.  4. **Imaging Studies**:  - **CT Scan**: A computed tomography (CT) scan of the head can help visualize any skull base fractures or bony defects that may be causing CSF leakage.  - **MRI**: Magnetic resonance imaging (MRI) may also be performed to assess the skull base and identify any abnormalities, such as meningoceles or meningoencephaloceles.  5. **Beta-2 Transferrin Immunoelectrophoresis**: This is a more specific laboratory test that can confirm the presence of beta-2 transferrin in the nasal discharge.  6. **Nasal Endoscopy**: This procedure involves inserting a thin, flexible tube with a camera (endoscope) into the nasal passages to directly visualize any CSF leakage sites, such as a meningocele or defect in the cribriform plate.  7. **Cisternography**: In this nuclear medicine imaging technique, a radioactive tracer is injected into the subarachnoid space via a lumbar puncture. Images are then taken to track the flow of the tracer and locate any CSF leaks.  8. **High-resolution CT Cisternography**: This specialized CT imaging technique involves the injection of contrast material into the subarachnoid space to visualize CSF leaks.  9. **Intrathecal Fluorescein Injection**: In some cases, fluorescein dye may be injected into the cerebrospinal fluid during a lumbar puncture. If CSF leakage is suspected, the dye may be visible in the nasal discharge when viewed under a Wood's lamp.  These tests are often used in combination to confirm the diagnosis of CSF rhinorrhea, determine the location of the leakage, and plan appropriate treatment. It's important for these tests to be conducted under the guidance of a medical professional experienced in managing CSF leaks. | Consistent | 2 | 1 | 1 |
| 1. Describe the anatomy of the nasolacrimal system | The nasolacrimal system is a crucial part of the human eye's anatomy responsible for draining tears from the eye's surface into the nasal cavity. Its primary components include the lacrimal gland, lacrimal puncta, lacrimal canaliculi, lacrimal sac, and nasolacrimal duct.  1. **Lacrimal Gland**: This almond-shaped gland located above the outer corner of each eye produces tears. These tears spread across the surface of the eye to maintain moisture and protect against foreign particles.  2. **Lacrimal Puncta**: There are two puncta (singular: punctum) located on the inner corner of each eyelid, one in the upper lid and one in the lower lid. They are tiny openings through which tears enter the lacrimal canaliculi.  3. **Lacrimal Canaliculi**: These are narrow ducts that start from the lacrimal puncta and extend inward towards the lacrimal sac. There are two canaliculi in each eye, referred to as the superior and inferior canaliculi. They serve to collect tears from the puncta and transport them to the lacrimal sac.  4. **Lacrimal Sac**: The canaliculi converge to form the lacrimal sac, a small pouch-like structure located in the medial wall of the orbit, near the nose. The lacrimal sac acts as a reservoir for tears before they drain into the nasolacrimal duct.  5. **Nasolacrimal Duct**: This is a narrow tube that extends from the lacrimal sac into the nasal cavity. It travels downward, following the side of the nose, and opens into the inferior nasal meatus. The nasolacrimal duct is responsible for carrying tears from the lacrimal sac into the nasal cavity, where they eventually evaporate or are swallowed.  The nasolacrimal system plays a crucial role in maintaining eye health by ensuring proper drainage of tears. Dysfunction or blockages within this system can lead to conditions such as excessive tearing (epiphora) or dry eye syndrome. | Consistent | 1 | 1 | 1 |
| 1. What are the indications for dacryocystorhinostomy surgery? | Dacryocystorhinostomy (DCR) surgery is typically indicated for individuals with nasolacrimal duct obstruction, which can lead to symptoms such as excessive tearing (epiphora), recurrent eye infections, and chronic inflammation of the lacrimal sac (dacryocystitis). The common indications for DCR surgery include:  1. **Nasolacrimal Duct Obstruction (NLDO)**: This is the primary indication for DCR surgery. NLDO can occur due to various reasons such as trauma, inflammation, infection, or congenital anomalies, leading to blockage of the tear drainage system.  2. **Chronic Dacryocystitis**: Chronic inflammation of the lacrimal sac due to obstruction in the nasolacrimal duct can cause recurrent infections and discomfort. DCR may be indicated to relieve this condition.  3. **Epiphora**: Excessive tearing due to inadequate drainage of tears caused by nasolacrimal duct obstruction is often alleviated by DCR surgery.  4. **Recurrent Conjunctivitis or Keratitis**: Chronic tear pooling can predispose individuals to recurrent eye infections, which may necessitate DCR surgery to establish proper drainage and prevent future infections.  5. **Failed Conservative Management**: When nonsurgical treatments such as lacrimal sac massage, warm compresses, and antibiotic therapy fail to provide adequate relief, DCR surgery may be considered.  6. **Congenital Nasolacrimal Duct Obstruction**: In infants born with congenital blockage of the nasolacrimal duct, persistent tearing and recurrent infections may prompt the need for DCR surgery if conservative measures are ineffective.  7. **Secondary NLDO**: NLDO can also occur secondary to other conditions such as trauma, tumors, or iatrogenic causes (e.g., after radiation therapy or following certain surgeries). In such cases, DCR may be indicated to restore proper tear drainage.  8. **Functional Nasolacrimal Duct Obstruction**: In cases where there's no identifiable anatomical obstruction but tear drainage is impaired due to functional reasons, DCR surgery may be recommended to create an alternative pathway for tear drainage.  It's important for patients to undergo a thorough evaluation by an ophthalmologist or oculoplastic surgeon to determine the underlying cause of their symptoms and whether DCR surgery is the appropriate course of action. | Consistent | 1 | 1 | 1 |
| 1. What is an Onodi cell? | An Onodi cell, also known as a sphenoethmoidal cell, is a type of paranasal sinus cell that is anatomically variant and located in the sphenoid sinus. It is characterized by its position posterior and lateral to the sphenoid sinus, often extending over the optic nerve or optic canal. This anatomical variation can be of significance in various medical disciplines, particularly in otolaryngology, neurosurgery, and radiology, due to its potential implications for surgical procedures and the risk of complications.  Here are some key features of the Onodi cell:  1. **Location**: Onodi cells are situated posterior and lateral to the sphenoid sinus. They can extend laterally over the optic nerve or optic canal and sometimes even into the anterior clinoid process.  2. **Anatomical Variability**: The presence, size, and extent of Onodi cells can vary among individuals. They may occur unilaterally or bilaterally and can have variable configurations.  3. **Clinical Significance**: Onodi cells can pose challenges in various surgical procedures involving the sphenoid sinus, such as endoscopic sinus surgery, transsphenoidal pituitary surgery, and optic nerve decompression procedures. Their proximity to critical structures like the optic nerve increases the risk of injury during surgery.  4. **Radiological Identification**: Onodi cells are typically identified through radiological imaging, such as computed tomography (CT) or magnetic resonance imaging (MRI) of the paranasal sinuses. Radiologists and surgeons need to be aware of their presence to plan and execute surgical procedures safely.  5. **Complications**: Due to their close proximity to the optic nerve, Onodi cells can increase the risk of optic nerve injury, visual disturbances, and postoperative complications if not identified and managed appropriately during surgical interventions involving the sphenoid sinus.  Overall, understanding the anatomical variations of the sphenoid sinus, including the presence of Onodi cells, is essential for surgeons and radiologists to ensure safe and effective management of conditions involving this region of the skull base. | Consistent | 1 | 2 | 1 |
| 1. What is the clinical significance of the Onodi cell? | The clinical significance of the Onodi cell lies primarily in its anatomical relationship to critical structures within the skull base, particularly the optic nerve and optic canal. Understanding the presence and characteristics of Onodi cells is important for various medical specialties, including otolaryngology, neurosurgery, and radiology, due to its implications for surgical planning and the risk of complications. Here are several aspects of the clinical significance of the Onodi cell:  1. **Surgical Implications**: Onodi cells can complicate surgical procedures involving the sphenoid sinus and adjacent structures. For example, in endoscopic sinus surgery, transsphenoidal pituitary surgery, or optic nerve decompression procedures, the presence of an Onodi cell increases the risk of injury to the optic nerve due to its close proximity.  2. **Risk of Injury**: The optic nerve and optic canal are critical structures responsible for vision. An Onodi cell extending over or adjacent to these structures increases the risk of inadvertent injury during surgical manipulation, potentially leading to visual disturbances or even blindness.  3. **Anatomical Variability**: Onodi cells exhibit considerable variability in their size, shape, and position. This variability necessitates careful preoperative evaluation through radiological imaging to identify and characterize the presence of Onodi cells, allowing surgeons to anticipate and mitigate potential risks during procedures involving the sphenoid sinus.  4. **Postoperative Complications**: Failure to recognize and appropriately manage Onodi cells during surgery can result in postoperative complications such as optic nerve injury, visual deficits, cerebrospinal fluid leaks, and sinusitis. Awareness of the presence of Onodi cells and meticulous surgical technique are crucial for minimizing these risks.  5. **Radiological Identification**: Radiological imaging modalities, such as computed tomography (CT) and magnetic resonance imaging (MRI) of the paranasal sinuses, play a pivotal role in identifying Onodi cells preoperatively. Radiologists must accurately identify and characterize Onodi cells to provide essential information to surgeons for surgical planning and intraoperative navigation.  Overall, the clinical significance of the Onodi cell underscores the importance of interdisciplinary collaboration among otolaryngologists, neurosurgeons, radiologists, and other specialists to optimize patient outcomes and mitigate the risks associated with surgical procedures involving the sphenoid sinus and adjacent structures. | Consistent | 1 | 1 | 1 |
| 1. What is a Haller cell? | A Haller cell is a type of anatomical variation or anomaly found within the maxillary sinus, which is one of the paranasal sinuses located within the facial region. This cell is named after the Swiss anatomist Albert von Haller.  A Haller cell is essentially an accessory ethmoidal air cell that protrudes into the maxillary sinus. Normally, the maxillary sinus is lined with mucous membrane and serves to warm and humidify inhaled air, as well as to lighten the skull. However, when a Haller cell is present, it may occupy space within the maxillary sinus, potentially reducing the volume available for the sinus to perform its normal functions.  The presence of Haller cells is usually discovered incidentally during radiographic imaging of the paranasal sinuses, such as during a CT (computed tomography) scan. In most cases, Haller cells are asymptomatic and do not require treatment. However, if they contribute to sinusitis or other sinus-related issues, treatment options may include medication to manage symptoms or surgical intervention to address the anatomical abnormality. | Consistent | 1 | 1 | 1 |
| 1. Define pneumatization of the sphenoid sinus and mention its clinical importance? | Pneumatization of the sphenoid sinus refers to the expansion or development of the sphenoid sinus, an air-filled cavity located within the sphenoid bone of the skull. This pneumatization process occurs during normal growth and development but can vary in extent among individuals.  Clinical importance of pneumatization of the sphenoid sinus includes:  1. **Anatomical Variations**: The degree of pneumatization can vary greatly among individuals, leading to differences in the size and shape of the sphenoid sinus. Understanding these variations is crucial for surgeons performing procedures in the area, as it can impact surgical access and potential complications.  2. **Sinusitis**: Pneumatization can affect the susceptibility to sinusitis, an inflammation or infection of the sinuses. Variations in sinus anatomy, including pneumatization, may influence the drainage of mucus from the sinus cavity, potentially contributing to sinusitis development.  3. **Tumors and Lesions**: Pneumatization patterns can influence the presentation and management of tumors or lesions affecting the sphenoid sinus. The size and shape of the sinus may impact the growth patterns and symptoms associated with such conditions, as well as the feasibility of surgical intervention.  4. **Imaging Interpretation**: Radiologists rely on the assessment of pneumatization patterns when interpreting imaging studies such as CT (computed tomography) or MRI (magnetic resonance imaging) scans of the skull. Understanding the normal variations and anomalies related to pneumatization is essential for accurate diagnosis and treatment planning.  5. **Neurosurgery and Skull Base Surgery**: Pneumatization of the sphenoid sinus can significantly affect surgical approaches to the skull base and adjacent structures. Surgeons must consider the size, shape, and location of the sinus during procedures such as transsphenoidal surgery for pituitary tumors or approaches to the sellar region.  Overall, understanding the pneumatization of the sphenoid sinus is critical for various medical specialties, including otolaryngology, neurosurgery, radiology, and anatomical sciences, as it can impact clinical management, surgical planning, and interpretation of imaging studies. | Consistent | 2 | 1 | 2 |
| 1. What are the important structures in the cavernous sinüs? | The cavernous sinus is a crucial structure located on each side of the body, situated on either side of the sella turcica (a depression in the sphenoid bone). It contains a complex network of blood vessels, nerves, and other structures. Some of the important structures found within the cavernous sinus include:  1. **Internal carotid artery**: This major blood vessel supplies blood to the brain. It traverses through the cavernous sinus before entering the brain.  2. **Abducens nerve (CN VI)**: This cranial nerve controls the lateral rectus muscle of the eye, which moves the eye away from the nose. It runs through the cavernous sinus.  3. **Oculomotor nerve (CN III)**: This cranial nerve controls the movement of most of the muscles in the eye, including the superior rectus, inferior rectus, medial rectus, and inferior oblique muscles. It also controls the constriction of the pupil (miosis) and the shape of the lens (accommodation). It passes through the cavernous sinus.  4. **Trochlear nerve (CN IV)**: This cranial nerve controls the superior oblique muscle of the eye, which helps in downward and inward eye movements. It also runs through the cavernous sinus.  5. **Ophthalmic nerve (V1 branch of the trigeminal nerve, CN V)**: This is one of the three branches of the trigeminal nerve, responsible for sensory innervation of the upper face, including the forehead, scalp, upper eyelid, and nose. It passes through the cavernous sinus before entering the orbit through the superior orbital fissure.  6. **Maxillary nerve (V2 branch of the trigeminal nerve, CN V)**: This is another branch of the trigeminal nerve, providing sensory innervation to the middle face, including the lower eyelid, cheek, and upper lip. It also traverses through the cavernous sinus.  7. **Venous sinuses**: The cavernous sinus itself is a venous sinus, which serves as a conduit for blood drainage from the brain and surrounding structures. It connects with other venous sinuses such as the superior and inferior petrosal sinuses.  In summary, the cavernous sinus houses important structures such as cranial nerves, major blood vessels, and venous sinuses, making it a critical region in the head for both vascular and neural functions. Any pathology affecting this area can have significant consequences on vision, eye movements, and other sensory functions of the face. | Consistent | 1 | 1 | 1 |
| 1. Describe the clinical findings and pathogenesis of Tolosa-Hunt syndrome. | Tolosa-Hunt syndrome (THS) is a rare neurological disorder characterized by severe unilateral periorbital pain, accompanied by paralysis or weakness of the muscles surrounding the eye (ophthalmoplegia). It is caused by inflammation of the cavernous sinus or superior orbital fissure, which are structures located behind the eye socket (orbit) where several important nerves and blood vessels pass through.  Clinical Findings:  1. **Severe Periorbital Pain**: Patients typically experience sharp, stabbing, or throbbing pain around one eye, which can be very intense and may worsen with eye movement.  2. **Ophthalmoplegia**: This refers to paralysis or weakness of the muscles that control eye movement. Patients may experience double vision (diplopia), difficulty moving the eye in certain directions, or complete paralysis of eye movement.  3. **Ptosis**: Drooping of the eyelid on the affected side.  4. **Decreased Vision**: Some patients may experience blurred vision or other visual disturbances.  5. **Other Symptoms**: In some cases, patients may also experience facial pain, headache, or symptoms related to involvement of adjacent cranial nerves.  Pathogenesis:  The exact cause of Tolosa-Hunt syndrome is not fully understood, but it is believed to involve an inflammatory process affecting the cavernous sinus or superior orbital fissure. This inflammation can lead to compression or irritation of the nerves passing through these structures, particularly the oculomotor, trochlear, and abducens nerves, which control eye movement, as well as the ophthalmic division of the trigeminal nerve, which is responsible for sensation in the face and around the eyes.  The inflammation in THS is often considered to be idiopathic, meaning that it occurs without a known cause. However, it has been proposed that it may result from autoimmune mechanisms, in which the body's immune system mistakenly attacks its own tissues. In some cases, THS may also be associated with other inflammatory conditions such as granulomatous diseases or infections.  Diagnosis of THS is typically made based on clinical presentation, exclusion of other possible causes of similar symptoms, and imaging studies such as magnetic resonance imaging (MRI) or computed tomography (CT) scans to assess the extent of inflammation and rule out other underlying conditions.  Treatment usually involves the use of corticosteroids to reduce inflammation and alleviate symptoms. In some cases, other immunosuppressive medications may be used if corticosteroids are not effective or if the condition recurs. Prompt diagnosis and treatment are important to prevent complications and minimize the risk of long-term damage to the affected nerves. | Consistent | 1 | 1 | 1 |
| 1. What is the suprabullar cell classification? | Suprabullar cells are a type of paranasal sinus cell that lie superior to the bulla ethmoidalis, which is a prominent anatomical landmark within the ethmoid sinus. These cells are classified based on their anatomical location and relationship to adjacent structures. The classification system for suprabullar cells is as follows:  1. Type I: Isolated suprabullar cells that are completely separated from the ethmoid sinus and frontal recess.  2. Type II: Suprabullar cells that are connected to the ethmoid sinus through a narrow channel.  3. Type III: Suprabullar cells that are directly connected to the ethmoid sinus without an intervening bulla ethmoidalis.  4. Type IV: Suprabullar cells that extend into the frontal recess but do not involve the frontal sinus.  This classification system helps in understanding the anatomical variations and aids in surgical planning for conditions involving the paranasal sinuses. | Consistent | 2 | 3 | 2 |
| 1. Describe frontal sinus surgery with the intact bulla approach and explain its indications. | Frontal sinus surgery with the intact bulla approach is a technique used to address conditions affecting the frontal sinus while preserving the integrity of the frontal recess and ethmoid bulla. This approach is typically employed when dealing with certain frontal sinus pathologies, such as chronic frontal sinusitis, mucoceles, frontal sinus polyps, or frontal sinus tumors, where preservation of normal sinus anatomy is desirable.  Here's a step-by-step description of the procedure:  1. **Preoperative Evaluation**: Before surgery, thorough clinical evaluation and imaging studies like CT scans are performed to assess the extent of disease, anatomy of the frontal sinus, and surrounding structures.  2. **Anesthesia**: The patient is placed under general anesthesia to ensure comfort and immobility during the procedure.  3. **Incision**: A small incision is made either along the hairline or within the eyebrow, depending on the surgeon's preference and the specific case. This incision provides access to the frontal sinus region.  4. **Soft Tissue Dissection**: Soft tissues, including skin, subcutaneous fat, and muscle, are carefully dissected to expose the frontal sinus area while minimizing trauma to surrounding structures.  5. **Frontal Recess Identification**: Once the frontal sinus is accessed, the frontal recess—the narrow passage connecting the frontal sinus to the nasal cavity—is identified and preserved. This is a critical step in maintaining the natural drainage pathway of the sinus.  6. **Frontal Sinus Exploration**: With the frontal recess preserved, the surgeon gains access to the frontal sinus. Any diseased tissue, such as inflamed mucosa, polyps, or tumor, is carefully removed or addressed.  7. **Bulla Preservation**: The ethmoid bulla, a bony prominence in the lateral wall of the ethmoid sinus, is intentionally preserved during the procedure. This helps maintain the natural ventilation and drainage of the ethmoid and frontal sinuses.  8. **Sinus Ventilation and Drainage**: Special attention is paid to ensuring adequate ventilation and drainage of the frontal sinus. This may involve enlarging the frontal ostium (opening) or creating new pathways to facilitate proper sinus function.  9. **Closure**: After addressing the pathology and ensuring proper sinus ventilation, the incision is closed meticulously to promote optimal wound healing and cosmesis.  Indications for frontal sinus surgery with the intact bulla approach include:  - Chronic frontal sinusitis that has not responded to medical management  - Frontal sinus mucoceles (accumulation of mucus in the sinus)  - Frontal sinus polyps causing obstruction or recurrent infections  - Benign or malignant tumors involving the frontal sinus  - Complications of frontal sinus disease, such as orbital or intracranial extension  Overall, the intact bulla approach offers a conservative yet effective means of addressing frontal sinus pathology while preserving important anatomical structures and minimizing the risk of complications. It requires expertise in endoscopic sinus surgery and a thorough understanding of sinus anatomy. | Consistent | 1 | 3 | 3 |
| 1. What are the most common causes of CSF rhinorrhea? | Cerebrospinal fluid (CSF) rhinorrhea refers to the leakage of CSF from the nose. The most common causes of CSF rhinorrhea include:  1. **Trauma**: This is the most common cause, often resulting from head injuries, fractures to the skull base, or surgical trauma to the skull and face.  2. **Spontaneous**: In some cases, CSF leaks can occur spontaneously without any apparent cause. This may be due to defects or weaknesses in the skull base or surrounding tissues.  3. **Tumors**: Certain tumors, particularly those affecting the skull base such as meningiomas or schwannomas, can erode through bone and lead to CSF leakage.  4. **Idiopathic Intracranial Hypertension (IIH)**: Increased pressure within the skull can sometimes cause CSF leaks.  5. **Congenital Defects**: Rarely, individuals may be born with abnormalities in the skull base or the surrounding tissues, predisposing them to CSF leaks.  6. **Iatrogenic**: CSF leaks can occur as a complication of certain medical procedures involving the skull, sinuses, or brain, such as sinus surgery, head and neck surgeries, or lumbar punctures.  It's essential to diagnose and treat CSF rhinorrhea promptly to prevent complications such as meningitis or intracranial infections. Treatment typically involves surgical repair of the leak and measures to reduce CSF pressure if necessary. | Consistent | 1 | 1 | 1 |
| 1. In patients with spontaneous CSF rhinorrhoea, what are the most common sites of defects? | In patients with spontaneous cerebrospinal fluid (CSF) rhinorrhea, the most common sites of defects typically involve the skull base, particularly in areas where there is thinning or erosion of bone through which the CSF can leak into the nasal passages. These defects can occur due to various reasons such as trauma, surgery, congenital anomalies, or idiopathic causes. Some of the common sites of defects include:  1. Cribriform plate: This is a thin bone that separates the cranial cavity from the nasal cavity. Defects in the cribriform plate are a frequent cause of CSF rhinorrhea, often associated with trauma or congenital defects.  2. Ethmoid roof: The ethmoid bone, particularly its roof, can have defects leading to CSF leakage. These defects may be due to trauma, surgical procedures, or anatomical variations.  3. Sphenoid sinus: The sphenoid sinus is another common location for defects causing CSF rhinorrhea. Erosion or thinning of the bone surrounding the sphenoid sinus can result in CSF leakage.  4. Frontal sinus: Defects in the frontal sinus can also lead to CSF rhinorrhea. These defects may result from trauma, surgical intervention, or other causes.  5. Skull base fractures: Traumatic injuries, such as skull base fractures, can cause disruptions in the bony structures surrounding the cranial cavity, leading to CSF leakage.  It's essential to diagnose the specific site of the defect accurately to determine the most appropriate treatment approach, which may include surgical repair to prevent ongoing CSF leakage and potential complications such as meningitis. Imaging studies, such as CT scans or MRI, are often used to identify the site and extent of the defect in patients with CSF rhinorrhea. | Consistent | 1 | 2 | 2 |
| 1. What are the most commonly used approaches for the repair of CSF rhinorrhoea? | Cerebrospinal fluid (CSF) rhinorrhea is a condition characterized by the leakage of cerebrospinal fluid from the nose, often due to a defect or injury in the skull base or surrounding structures. The repair of CSF rhinorrhea typically involves surgical intervention. Some commonly used approaches for the repair of CSF rhinorrhea include:  1. Endoscopic Endonasal Surgery: This minimally invasive approach involves accessing the site of CSF leakage through the nasal passages using an endoscope. Surgeons use specialized instruments to repair the defect in the skull base and close off the leak. Endoscopic techniques offer advantages such as reduced trauma, faster recovery, and fewer complications compared to traditional open surgery.  2. Transnasal Transsphenoidal Surgery: This approach involves accessing the skull base through the sphenoid sinus, which is located behind the nasal passages. Surgeons can repair CSF leaks in this region through a transnasal transsphenoidal approach, accessing the defect without the need for external incisions.  3. Craniotomy: In cases where the CSF leak is associated with larger skull base defects or tumors, a craniotomy may be necessary. This involves making an incision in the scalp and creating a bone flap to access the skull base directly. Surgeons then repair the defect and replace the bone flap to secure the closure.  4. Lumbar Drainage: In some cases, temporary CSF diversion through lumbar drainage may be employed to reduce intracranial pressure and facilitate healing of the CSF leak. This involves inserting a catheter into the lumbar spine to drain CSF and relieve pressure on the skull base.  5. Tissue Grafts and Sealants: Various tissue grafts, such as fascia or synthetic materials, may be used to reinforce the repair site and promote healing. Additionally, sealants or adhesives may be applied to ensure watertight closure of the defect.  6. Microsurgical Techniques: In complex cases or when dealing with small defects, microsurgical techniques may be employed to precisely repair the CSF leak under magnification.  The choice of approach depends on factors such as the location and size of the CSF leak, the underlying cause, the patient's overall health, and the surgeon's expertise. Multidisciplinary collaboration between neurosurgeons, otolaryngologists, and other specialists may be necessary to achieve optimal outcomes in CSF rhinorrhea repair. | Consistent | 2 | 2 | 2 |
| 1. What are the advantages of endoscopical approach over external approaches in CSF rhinorrhea repair? | Endoscopic approaches offer several advantages over external approaches in cerebrospinal fluid (CSF) rhinorrhea repair:  1. **Minimally Invasive:** Endoscopic techniques involve accessing the surgical site through the natural openings of the body, such as the nostrils, without the need for external incisions. This minimally invasive approach reduces trauma to surrounding tissues, resulting in less postoperative pain, faster recovery, and shorter hospital stays compared to external approaches.  2. **Improved Visualization:** Endoscopes provide high-definition, magnified views of the nasal cavity and skull base structures, allowing for precise identification and repair of CSF leaks. This enhanced visualization helps surgeons navigate complex anatomical structures more safely and effectively, reducing the risk of complications.  3. **Preservation of Nasal Function:** Endoscopic techniques preserve the normal anatomy and function of the nasal cavity, including the nasal mucosa and nasal turbinates, leading to better postoperative nasal airflow and less risk of complications such as nasal crusting, synechiae (adhesions), and nasal septal perforation.  4. **Reduced Risk of Cosmetic Deformity:** Since endoscopic approaches do not involve external incisions or visible scarring, they minimize the risk of cosmetic deformity compared to external approaches, which may leave noticeable scars or alter the appearance of the face.  5. **Customized Repair:** Endoscopic techniques allow surgeons to tailor the repair to the specific location and size of the CSF leak, optimizing outcomes and reducing the likelihood of recurrence.  6. **Decreased Risk of Complications:** By avoiding external incisions and extensive tissue dissection, endoscopic approaches reduce the risk of complications such as wound infections, hematoma formation, and damage to surrounding structures (e.g., facial nerves, blood vessels).  7. **Shorter Hospitalization and Recovery Time:** Patients undergoing endoscopic CSF rhinorrhea repair typically experience shorter hospital stays and faster recovery times compared to those undergoing external approaches. This can lead to quicker return to normal activities and improved overall quality of life.  Overall, endoscopic approaches offer numerous advantages over external approaches in CSF rhinorrhea repair, making them the preferred choice for many patients and surgeons. | Consistent | 1 | 1 | 1 |
